# Supplementary material
Source: PubMed Central journal article supplement (PMC2733945)
Supplement: NIHMS115013-supplement-01.pdf [file NIHMS115013-supplement-01.pdf]

**Supplementary table 1****Upregulated transcripts in sarcoid vs control with 1.5-fold change or more and q-value < 5%**

| Probe Set ID          | Gene Symbol           | Gene Title                                                                                              | Fold Change | q value (%) |
|-----------------------|-----------------------|---------------------------------------------------------------------------------------------------------|-------------|-------------|
| 228439_at             | BATF2                 | basic leucine zipper transcription factor, ATF-like 2                                                   | 11.149      | 0.000       |
| 214511_x_at           | FCGR1B                | Fc fragment of IgG, high affinity Ib, receptor (CD64)                                                   | 4.694       | 0.000       |
| 223670_s_at           | HEMGN                 | hemogen                                                                                                 | 6.004       | 0.000       |
| 216950_s_at           | FCGR1A                | Fc fragment of IgG, high affinity Ia, receptor (CD64)                                                   | 5.101       | 0.000       |
| 227458_at             | ---                   | ---                                                                                                     | 4.630       | 0.000       |
| 1552583_s_at          | ABCC13                | ATP-binding cassette, sub-family C (CFTR/MRP), member 13                                                | 8.867       | 0.000       |
| 206637_at             | P2RY14                | purinergic receptor P2Y, G-protein coupled, 14                                                          | 3.078       | 0.000       |
| 220173_at             | C14orf45              | chromosome 14 open reading frame 45                                                                     | 3.508       | 0.000       |
| 209969_s_at           | STAT1                 | signal transducer and activator of transcription 1, 91kDa                                               | 2.252       | 0.000       |
| 200986_at             | SERPING1              | serpin peptidase inhibitor, clade G (C1 inhibitor), member 1, (angioedema, hereditary)                  | 11.128      | 0.000       |
| 224225_s_at           | ETV7                  | ets variant gene 7 (TEL2 oncogene)                                                                      | 12.104      | 0.000       |
| 238581_at             | GBP5                  | Guanylate binding protein 5                                                                             | 3.689       | 0.000       |
| 210029_at             | INDO                  | indoleamine-pyrrole 2,3 dioxygenase                                                                     | 3.687       | 0.000       |
| 223669_at             | HEMGN                 | hemogen                                                                                                 | 3.507       | 0.000       |
| 204858_s_at           | ECGF1                 | endothelial cell growth factor 1 (platelet-derived)                                                     | 2.048       | 0.000       |
| 213716_s_at           | SECTM1                | secreted and transmembrane 1                                                                            | 2.124       | 0.000       |
| 211560_s_at           | ALAS2                 | aminolevulinate, delta-, synthase 2 (sideroblastic/hypochromic anemia)                                  | 2.901       | 0.000       |
| 225388_at             | TSPAN5                | tetraspanin 5                                                                                           | 2.715       | 0.000       |
| 231769_at             | FBXO6                 | F-box protein 6                                                                                         | 2.080       | 0.000       |
| 202748_at             | GBP2                  | guanylate binding protein 2, interferon-inducible /// guanylate binding protein 2, interferon-inducible | 1.775       | 0.000       |
| 219630_at             | PDZK1IP1              | PDZK1 interacting protein 1                                                                             | 2.491       | 0.000       |
| 242907_at             | GBP2                  | guanylate binding protein 2, interferon-inducible                                                       | 1.796       | 0.000       |
| AFFX-<br>HUMISGF3A/M9 | STAT1                 | signal transducer and activator of transcription 1, 91kDa                                               | 2.233       | 0.000       |
| 7935_MB_at            |                       |                                                                                                         |             |             |
| 1553589_a_at          | PDZK1IP1              | PDZK1 interacting protein 1                                                                             | 2.436       | 0.000       |
| 206414_s_at           | DDEF2                 | development and differentiation enhancing factor 2                                                      | 2.174       | 0.000       |
| 225387_at             | TSPAN5                | tetraspanin 5                                                                                           | 2.739       | 0.000       |
| 221747_at             | TNS1                  | Tensin 1 /// Tensin 1                                                                                   | 4.463       | 0.000       |
| 204187_at             | GMPR                  | guanosine monophosphate reductase /// guanosine monophosphate reductase                                 | 3.076       | 0.000       |
| 202468_s_at           | CTNNAL1               | catenin (cadherin-associated protein), alpha-like 1                                                     | 4.651       | 0.000       |
| 225167_at             | FRMD4A                | FERM domain containing 4A                                                                               | 6.672       | 0.000       |
| 220306_at             | FAM46C                | family with sequence similarity 46, member C                                                            | 4.042       | 0.000       |
| 205950_s_at           | CA1                   | carbonic anhydrase I                                                                                    | 5.246       | 0.000       |
| 233371_at             | ABCC13                | ATP-binding cassette, sub-family C (CFTR/MRP), member 13                                                | 6.304       | 0.000       |
| 218232_at             | C1QA                  | complement component 1, q subcomponent, A chain                                                         | 3.150       | 0.000       |
| 238327_at             | GCLM ///<br>LOC440836 | glutamate-cysteine ligase, modifier subunit /// similar to MGC52679 protein                             | 2.314       | 0.000       |

## Supplementary table 1

## Upregulated transcripts

|              |                      |                                                                                                                                          |       |       |
|--------------|----------------------|------------------------------------------------------------------------------------------------------------------------------------------|-------|-------|
| 238439_at    | ANKRD22              | ankyrin repeat domain 22                                                                                                                 | 7.127 | 0.000 |
| 231578_at    | GBP1                 | guanylate binding protein 1, interferon-inducible, 67kDa                                                                                 | 5.294 | 0.000 |
| 229625_at    | GBP5                 | Guanylate binding protein 5                                                                                                              | 4.116 | 0.000 |
| 205592_at    | IL8                  | interleukin 8                                                                                                                            | 3.650 | 0.000 |
| 202269_x_at  | GBP1                 | guanylate binding protein 1, interferon-inducible, 67kDa<br>/// guanylate binding protein 1, interferon-inducible, 67kDa                 | 2.943 | 0.000 |
| 231577_s_at  | GBP1                 | guanylate binding protein 1, interferon-inducible, 67kDa                                                                                 | 2.715 | 0.000 |
| 206303_s_at  | NUDT4 ///<br>NUDT4P1 | nudix (nucleoside diphosphate linked moiety X)-type motif 4 /// nudix (nucleoside diphosphate linked moiety X)-type motif 4 pseudogene 1 | 3.104 | 0.000 |
| 202411_at    | IFI27                | interferon, alpha-inducible protein 27                                                                                                   | 5.017 | 0.000 |
| 201333_s_at  | ARHGEF12             | Rho guanine nucleotide exchange factor (GEF) 12                                                                                          | 4.312 | 0.000 |
| 201042_at    | TGM2                 | transglutaminase 2 (C polypeptide, protein-glutamine-gamma-glutamyltransferase)                                                          | 3.844 | 0.000 |
| 244840_x_at  | DOCK4                | dedicator of cytokinesis 4                                                                                                               | 3.180 | 0.000 |
| 221748_s_at  | TNS1                 | tensin 1 /// tensin 1                                                                                                                    | 4.086 | 0.000 |
| 207500_at    | CASP5                | caspase 5, apoptosis-related cysteine peptidase                                                                                          | 2.651 | 0.000 |
| 230645_at    | FRMD3                | FERM domain containing 3                                                                                                                 | 2.444 | 0.000 |
| 1564525_at   | ---                  | ---                                                                                                                                      | 2.152 | 0.000 |
| 227757_at    | CUL4A                | Cullin 4A                                                                                                                                | 3.678 | 0.000 |
| 202974_at    | MPP1                 | membrane protein, palmitoylated 1, 55kDa                                                                                                 | 2.400 | 0.000 |
| 202270_at    | GBP1                 | guanylate binding protein 1, interferon-inducible, 67kDa<br>/// guanylate binding protein 1, interferon-inducible, 67kDa                 | 2.512 | 0.000 |
| 221627_at    | TRIM10               | tripartite motif-containing 10                                                                                                           | 6.645 | 0.000 |
| 218864_at    | TNS1                 | tensin 1                                                                                                                                 | 3.452 | 0.000 |
| 218847_at    | IGF2BP2              | insulin-like growth factor 2 mRNA binding protein 2                                                                                      | 3.355 | 0.000 |
| 218863_s_at  | TNS1                 | tensin 1                                                                                                                                 | 2.732 | 0.000 |
| 214433_s_at  | SELENBP1             | selenium binding protein 1 /// selenium binding protein 1                                                                                | 3.287 | 0.000 |
| 205389_s_at  | ANK1                 | ankyrin 1, erythrocytic /// ankyrin 1, erythrocytic                                                                                      | 5.326 | 0.000 |
| 201912_s_at  | GSPT1                | G1 to S phase transition 1 /// G1 to S phase transition 1                                                                                | 2.231 | 0.000 |
| 235993_at    | ---                  | ---                                                                                                                                      | 2.580 | 0.000 |
| 212807_s_at  | SORT1                | sortilin 1                                                                                                                               | 1.773 | 0.000 |
| 225782_at    | MSRB3                | methionine sulfoxide reductase B3                                                                                                        | 2.157 | 0.000 |
| 215047_at    | TRIM58               | tripartite motif-containing 58                                                                                                           | 2.962 | 0.000 |
| 1552713_a_at | SLC4A1               | solute carrier family 4, anion exchanger, member 1 (erythrocyte membrane protein band 3, Diego blood group)                              | 5.754 | 0.000 |
| 212340_at    | YIPF6                | Yip1 domain family, member 6                                                                                                             | 2.134 | 0.000 |
| 236081_at    | ---                  | Transcribed locus                                                                                                                        | 4.839 | 0.000 |
| 203115_at    | FECH                 | ferrochelatase (protoporphyrin)                                                                                                          | 3.985 | 0.000 |
| 226811_at    | FAM46C               | family with sequence similarity 46, member C                                                                                             | 3.104 | 0.000 |
| 230972_at    | ANKRD9               | ankyrin repeat domain 9                                                                                                                  | 2.961 | 0.000 |
| 212658_at    | LHFPL2               | lipoma HMGIC fusion partner-like 2                                                                                                       | 2.389 | 0.000 |
| 208353_x_at  | ANK1                 | ankyrin 1, erythrocytic                                                                                                                  | 3.735 | 0.000 |
| 226763_at    | SESTD1               | SEC14 and spectrin domains 1                                                                                                             | 1.872 | 0.000 |

## Supplementary table 1

## Upregulated transcripts

|              |           |                                                                                   |       |       |
|--------------|-----------|-----------------------------------------------------------------------------------|-------|-------|
| 203116_s_at  | FECH      | ferrochelatase (protoporphyrin)                                                   | 3.687 | 0.000 |
| 207087_x_at  | ANK1      | ankyrin 1, erythrocytic                                                           | 3.462 | 0.000 |
| 227235_at    | GUCY1A3   | Guanylate cyclase 1, soluble, alpha 3                                             | 2.321 | 0.000 |
| 229740_at    | LOC643008 | PP12104                                                                           | 2.370 | 0.000 |
| 220751_s_at  | C5orf4    | chromosome 5 open reading frame 4                                                 | 2.752 | 0.000 |
| 207269_at    | DEFA4     | defensin, alpha 4, corticostatin                                                  | 5.034 | 0.000 |
| 209890_at    | TSPAN5    | tetraspanin 5 /// tetraspanin 5                                                   | 2.273 | 0.000 |
| 202124_s_at  | TRAK2     | trafficking protein, kinesin binding 2                                            | 3.129 | 0.000 |
| 1552348_at   | PRSS33    | protease, serine, 33                                                              | 3.176 | 0.000 |
| 223834_at    | CD274     | CD274 molecule                                                                    | 2.193 | 0.000 |
| 211889_x_at  | CEACAM1   | carcinoembryonic antigen-related cell adhesion molecule 1 (biliary glycoprotein)  | 3.114 | 0.000 |
| 204747_at    | IFIT3     | interferon-induced protein with tetratricopeptide repeats 3                       | 2.912 | 0.000 |
| 1558691_a_at | DOCK4     | dedicator of cytokinesis 4                                                        | 4.630 | 0.000 |
| 202672_s_at  | ATF3      | activating transcription factor 3                                                 | 4.156 | 0.000 |
| 214407_x_at  | GYPB      | glycophorin B (MNS blood group)                                                   | 4.149 | 0.000 |
| 231933_at    |           | 8-Mar membrane-associated ring finger (C3HC4) 8                                   | 2.275 | 0.000 |
| 205003_at    | DOCK4     | dedicator of cytokinesis 4                                                        | 2.599 | 0.000 |
| 213415_at    | CLIC2     | chloride intracellular channel 2                                                  | 2.250 | 0.000 |
| 215438_x_at  | GSPT1     | G1 to S phase transition 1                                                        | 2.114 | 0.000 |
| 219938_s_at  | PSTPIP2   | proline-serine-threonine phosphatase interacting protein 2                        | 1.952 | 0.000 |
| 221932_s_at  | GLRX5     | glutaredoxin 5 homolog (S. cerevisiae)                                            | 2.216 | 0.000 |
| 214040_s_at  | GSN       | gelsolin (amyloidosis, Finnish type)                                              | 2.311 | 0.000 |
| 223220_s_at  | PARP9     | poly (ADP-ribose) polymerase family, member 9                                     | 1.782 | 0.000 |
| 206765_at    | KCNJ2     | potassium inwardly-rectifying channel, subfamily J, member 2                      | 1.666 | 0.000 |
| 206698_at    | XK        | X-linked Kx blood group (McLeod syndrome)                                         | 4.431 | 0.000 |
| 216925_s_at  | TAL1      | T-cell acute lymphocytic leukemia 1                                               | 3.274 | 0.000 |
| 237403_at    | GFI1B     | growth factor independent 1B (potential regulator of CDKN1A, translocated in CML) | 2.525 | 0.000 |
| 235670_at    | STX11     | Syntaxin 11                                                                       | 1.699 | 0.000 |
| 205391_x_at  | ANK1      | ankyrin 1, erythrocytic /// ankyrin 1, erythrocytic                               | 3.443 | 0.000 |
| 215037_s_at  | BCL2L1    | BCL2-like 1                                                                       | 2.337 | 0.000 |
| 229893_at    | FRMD3     | FERM domain containing 3                                                          | 2.652 | 0.000 |
| 239979_at    | EPSTI1    | Epithelial stromal interaction 1 (breast)                                         | 3.809 | 0.000 |
| 240336_at    | HBM       | hemoglobin, mu                                                                    | 2.380 | 0.000 |
| 224789_at    | WDR40A    | WD repeat domain 40A                                                              | 2.093 | 0.000 |
| 204505_s_at  | EPB49     | erythrocyte membrane protein band 4.9 (dematin)                                   | 2.372 | 0.000 |
| 214073_at    | ALDH1A3   | Aldehyde dehydrogenase 1 family, member A3                                        | 3.162 | 0.000 |
| 212430_at    | RBM38     | RNA binding motif protein 38 /// RNA binding motif protein 38                     | 2.254 | 0.000 |
| 1561651_s_at | TAL1      | T-cell acute lymphocytic leukemia 1                                               | 2.301 | 0.000 |
| 206995_x_at  | SCARF1    | scavenger receptor class F, member 1                                              | 2.282 | 0.000 |
| 212148_at    | PBX1      | Pre-B-cell leukemia transcription factor 1                                        | 3.510 | 0.000 |
| 229450_at    | ---       | ---                                                                               | 2.313 | 0.000 |
| 210746_s_at  | EPB42     | erythrocyte membrane protein band 4.2 /// erythrocyte membrane protein band 4.2   | 2.969 | 0.000 |
| 221942_s_at  | GUCY1A3   | guanylate cyclase 1, soluble, alpha 3                                             | 2.406 | 0.000 |

|                                    |                      |                                                                                                                                          |       |       |
|------------------------------------|----------------------|------------------------------------------------------------------------------------------------------------------------------------------|-------|-------|
| 203502_at                          | BPGM                 | 2,3-bisphosphoglycerate mutase /// 2,3-bisphosphoglycerate mutase                                                                        | 2.920 | 0.000 |
| 201649_at                          | UBE2L6               | ubiquitin-conjugating enzyme E2L 6                                                                                                       | 1.904 | 0.000 |
| 218644_at                          | PLEK2                | pleckstrin 2                                                                                                                             | 3.246 | 0.000 |
| 224693_at                          | C20orf108            | chromosome 20 open reading frame 108                                                                                                     | 2.763 | 0.000 |
| 209546_s_at                        | APOL1                | apolipoprotein L, 1                                                                                                                      | 1.985 | 0.000 |
| 227609_at                          | EPST11               | epithelial stromal interaction 1 (breast)                                                                                                | 3.578 | 0.000 |
| 203662_s_at                        | TMOD1                | tropomodulin 1                                                                                                                           | 3.690 | 0.000 |
| 206196_s_at                        | RPIP8                | RaP2 interacting protein 8                                                                                                               | 6.031 | 0.000 |
| 231513_at                          | ---                  | Transcribed locus                                                                                                                        | 1.578 | 0.000 |
| 224690_at                          | C20orf108            | chromosome 20 open reading frame 108                                                                                                     | 2.446 | 0.000 |
| 213096_at                          | TMCC2                | transmembrane and coiled-coil domain family 2                                                                                            | 3.972 | 0.000 |
| 223266_at                          | ALS2CR2              | amyotrophic lateral sclerosis 2 (juvenile) chromosome region, candidate 2                                                                | 2.131 | 0.000 |
| 48031_r_at                         | C5orf4               | chromosome 5 open reading frame 4                                                                                                        | 2.271 | 0.000 |
| 207801_s_at                        | RNF10                | ring finger protein 10                                                                                                                   | 2.237 | 0.000 |
| 207459_x_at                        | GYPB                 | glycophorin B (MNS blood group)                                                                                                          | 3.920 | 0.000 |
| 218418_s_at                        | ANKRD25              | ankyrin repeat domain 25                                                                                                                 | 3.693 | 0.000 |
| 241237_at                          | LOC151146            | Hypothetical protein LOC151146                                                                                                           | 2.636 | 0.000 |
| 216833_x_at                        | GYPB /// GYPE        | glycophorin B (MNS blood group) /// glycophorin E                                                                                        | 3.165 | 0.000 |
| 206576_s_at                        | CEACAM1              | carcinoembryonic antigen-related cell adhesion molecule 1 (biliary glycoprotein)                                                         | 3.129 | 0.000 |
| 201906_s_at                        | CTDSPL               | CTD (carboxy-terminal domain, RNA polymerase II, polypeptide A) small phosphatase-like                                                   | 2.299 | 0.000 |
| AFFX-<br>HUMISGF3A/M9<br>7935_5_at | STAT1                | signal transducer and activator of transcription 1, 91kDa                                                                                | 1.712 | 0.000 |
| 206302_s_at                        | NUDT4 ///<br>NUDT4P1 | nudix (nucleoside diphosphate linked moiety X)-type motif 4 /// nudix (nucleoside diphosphate linked moiety X)-type motif 4 pseudogene 1 | 2.477 | 0.000 |
| 228770_at                          | GPR146               | G protein-coupled receptor 146                                                                                                           | 3.396 | 0.000 |
| 209498_at                          | CEACAM1              | carcinoembryonic antigen-related cell adhesion molecule 1 (biliary glycoprotein)                                                         | 2.767 | 0.000 |
| 206665_s_at                        | BCL2L1               | BCL2-like 1                                                                                                                              | 2.239 | 0.000 |
| 207511_s_at                        | C2orf24              | chromosome 2 open reading frame 24                                                                                                       | 1.846 | 0.000 |
| 203661_s_at                        | TMOD1                | tropomodulin 1                                                                                                                           | 3.841 | 0.000 |
| 221824_s_at                        |                      | 8-Mar membrane-associated ring finger (C3HC4) 8                                                                                          | 2.052 | 0.000 |
| 232375_at                          | STAT1                | Signal transducer and activator of transcription 1, 91kDa                                                                                | 2.005 | 0.000 |
| 208352_x_at                        | ANK1                 | ankyrin 1, erythrocytic                                                                                                                  | 2.900 | 0.000 |
| 223432_at                          | OSBP2                | oxysterol binding protein 2                                                                                                              | 2.986 | 0.000 |
| 237563_s_at                        | LOC440731            | hypothetical LOC440731                                                                                                                   | 1.938 | 0.000 |
| 209930_s_at                        | NFE2                 | nuclear factor (erythroid-derived 2), 45kDa                                                                                              | 1.745 | 0.000 |
| 236065_at                          | ---                  | Transcribed locus                                                                                                                        | 1.735 | 0.000 |
| 209339_at                          | SIAH2                | seven in absentia homolog 2 (Drosophila) /// seven in absentia homolog 2 (Drosophila)                                                    | 2.060 | 0.000 |
| 229390_at                          | RP1-93H18.5          | hypothetical protein LOC441168                                                                                                           | 2.382 | 0.000 |
| 227807_at                          | PARP9                | poly (ADP-ribose) polymerase family, member 9                                                                                            | 2.088 | 0.000 |
| 218141_at                          | UBE2O                | ubiquitin-conjugating enzyme E2O                                                                                                         | 2.292 | 0.000 |

## Supplementary table 1

## Upregulated transcripts

|                       |         |                                                                                   |       |       |
|-----------------------|---------|-----------------------------------------------------------------------------------|-------|-------|
| 212445_s_at           | NEDD4L  | neural precursor cell expressed, developmentally down-regulated 4-like            | 3.848 | 0.000 |
| 228088_at             | ---     | CDNA FLJ31513 fis, clone NT2R11000127                                             | 1.786 | 0.000 |
| 201285_at             | MKRN1   | makorin, ring finger protein, 1 /// makorin, ring finger protein, 1               | 1.825 | 0.000 |
| 1552349_a_at          | PRSS33  | protease, serine, 33                                                              | 3.154 | 0.000 |
| 235643_at             | SAMD9L  | sterile alpha motif domain containing 9-like                                      | 2.414 | 0.000 |
| 201195_s_at           | SLC7A5  | solute carrier family 7 (cationic amino acid transporter, y+ system), member 5    | 2.833 | 0.000 |
| 239196_at             | ANKRD22 | ankyrin repeat domain 22                                                          | 5.567 | 0.000 |
| 219763_at             | DENND1A | DENN/MADD domain containing 1A                                                    | 1.922 | 0.116 |
| 211883_x_at           | CEACAM1 | carcinoembryonic antigen-related cell adhesion molecule 1 (biliary glycoprotein)  | 2.595 | 0.116 |
| 221237_s_at           | OSBP2   | oxysterol binding protein 2 /// oxysterol binding protein 2                       | 2.398 | 0.116 |
| 224905_at             | WDR26   | WD repeat domain 26                                                               | 1.824 | 0.116 |
| 215761_at             | DMXL2   | Dmx-like 2                                                                        | 2.193 | 0.116 |
| 242300_at             | ---     | Ubiquitin B (UBB) mRNA, 3' UTR and genetic suppressor element                     | 3.658 | 0.116 |
| 214108_at             | MAX     | MYC associated factor X                                                           | 1.791 | 0.116 |
| 213797_at             | RSAD2   | radical S-adenosyl methionine domain containing 2                                 | 3.927 | 0.116 |
| 241916_at             | PLSCR1  | Phospholipid scramblase 1                                                         | 1.839 | 0.116 |
| 229530_at             | GUCY1A3 | Guanylate cyclase 1, soluble, alpha 3                                             | 2.194 | 0.116 |
| 229498_at             | ---     | MRNA; cDNA DKFZp779M2422 (from clone DKFZp779M2422)                               | 2.218 | 0.116 |
| 220807_at             | HBQ1    | hemoglobin, theta 1 /// hemoglobin, theta 1                                       | 2.304 | 0.116 |
| 200648_s_at           | GLUL    | glutamate-ammonia ligase (glutamine synthetase)                                   | 1.841 | 0.116 |
| 205570_at             | PIP5K2A | phosphatidylinositol-4-phosphate 5-kinase, type II, alpha                         | 2.130 | 0.116 |
| 210446_at             | GATA1   | GATA binding protein 1 (globin transcription factor 1)                            | 2.439 | 0.116 |
| 225168_at             | FRMD4A  | FERM domain containing 4A                                                         | 4.570 | 0.116 |
| AFFX-<br>HUMISGF3A/M9 | STAT1   | signal transducer and activator of transcription 1, 91kDa                         | 2.128 | 0.116 |
| 7935_MA_at            |         |                                                                                   |       |       |
| 225369_at             | ESAM    | endothelial cell adhesion molecule                                                | 2.076 | 0.116 |
| 202953_at             | C1QB    | complement component 1, q subcomponent, B chain                                   | 1.792 | 0.116 |
| 208501_at             | GFI1B   | growth factor independent 1B (potential regulator of CDKN1A, translocated in CML) | 2.098 | 0.116 |
| 210504_at             | KLF1    | Kruppel-like factor 1 (erythroid)                                                 | 2.512 | 0.116 |
| 217202_s_at           | GLUL    | glutamate-ammonia ligase (glutamine synthetase)                                   | 1.786 | 0.116 |
| 203395_s_at           | HES1    | hairy and enhancer of split 1, (Drosophila)                                       | 1.820 | 0.116 |
| 219814_at             | MBNL3   | muscleblind-like 3 (Drosophila)                                                   | 2.535 | 0.116 |
| 1555590_a_at          | GATA1   | GATA binding protein 1 (globin transcription factor 1)                            | 2.432 | 0.116 |
| 243222_at             | ALPK1   | Alpha-kinase 1                                                                    | 1.991 | 0.116 |
| 210993_s_at           | SMAD1   | SMAD family member 1                                                              | 1.876 | 0.116 |
| 239598_s_at           | AYTL1   | acyltransferase like 1                                                            | 1.713 | 0.116 |
| 212667_at             | SPARC   | secreted protein, acidic, cysteine-rich (osteonectin)                             | 3.017 | 0.116 |
| 202949_s_at           | FHL2    | four and a half LIM domains 2                                                     | 2.974 | 0.116 |
| 227366_at             | RILP    | Rab interacting lysosomal protein                                                 | 2.033 | 0.116 |
| 243271_at             | SAMD9L  | Sterile alpha motif domain containing 9-like                                      | 2.024 | 0.116 |

## Supplementary table 1

## Upregulated transcripts

|                                 |                       |                                                                                                                       |       |       |
|---------------------------------|-----------------------|-----------------------------------------------------------------------------------------------------------------------|-------|-------|
| 203040_s_at                     | HMBS                  | hydroxymethylbilane synthase                                                                                          | 2.075 | 0.116 |
| 229391_s_at                     | RP1-93H18.5           | hypothetical protein LOC441168                                                                                        | 2.391 | 0.116 |
| 221920_s_at                     | SLC25A37              | solute carrier family 25, member 37                                                                                   | 1.779 | 0.116 |
| 210854_x_at                     | SLC6A8                | solute carrier family 6 (neurotransmitter transporter, creatine), member 8                                            | 2.533 | 0.116 |
| 211821_x_at                     | GYP A                 | glycophorin A (MNS blood group)                                                                                       | 2.979 | 0.116 |
| 235276_at                       | ---                   | ---                                                                                                                   | 2.543 | 0.116 |
| 227438_at                       | ALPK1                 | alpha-kinase 1                                                                                                        | 1.910 | 0.116 |
| 235683_at                       | SESN3                 | sestrin 3                                                                                                             | 1.981 | 0.132 |
| 204466_s_at                     | SNCA                  | synuclein, alpha (non A4 component of amyloid precursor) /// synuclein, alpha (non A4 component of amyloid precursor) | 2.137 | 0.132 |
| 239258_at                       | RHOQ                  | Ras homolog gene family, member Q                                                                                     | 1.776 | 0.132 |
| 224701_at                       | PARP14                | poly (ADP-ribose) polymerase family, member 14                                                                        | 1.776 | 0.132 |
| 217748_at                       | ADIPOR1               | adiponectin receptor 1 /// adiponectin receptor 1                                                                     | 1.897 | 0.132 |
| 212759_s_at                     | TCF7L2                | transcription factor 7-like 2 (T-cell specific, HMG-box)                                                              | 1.786 | 0.132 |
| 242625_at                       | RSAD2                 | radical S-adenosyl methionine domain containing 2                                                                     | 3.423 | 0.132 |
| 48030_i_at                      | C5orf4                | chromosome 5 open reading frame 4                                                                                     | 2.022 | 0.132 |
| 217354_s_at                     | HPS1 ///<br>LOC646756 | Hermansky-Pudlak syndrome 1 /// similar to Hermansky-Pudlak syndrome 1 protein isoform b                              | 2.126 | 0.132 |
| 212312_at                       | BCL2L1                | BCL2-like 1 /// BCL2-like 1                                                                                           | 2.136 | 0.132 |
| 223549_s_at                     | ESPN                  | espin                                                                                                                 | 2.733 | 0.132 |
| AFFX-<br>HUMRGE/M100<br>98_3_at | ---                   | ---                                                                                                                   | 1.835 | 0.132 |
| 211864_s_at                     | FER1L3                | fer-1-like 3, myoferlin (C. elegans)                                                                                  | 2.132 | 0.132 |
| 202307_s_at                     | TAP1                  | transporter 1, ATP-binding cassette, sub-family B (MDR/TAP)                                                           | 1.624 | 0.132 |
| 239492_at                       | SEC14L4               | SEC14-like 4 (S. cerevisiae)                                                                                          | 3.629 | 0.132 |
| 200629_at                       | WARS                  | tryptophanyl-tRNA synthetase                                                                                          | 1.761 | 0.132 |
| 232465_at                       | TCF7L2                | Transcription factor 7-like 2 (T-cell specific, HMG-box)                                                              | 2.126 | 0.132 |
| 227935_s_at                     | PCGF5                 | polycomb group ring finger 5                                                                                          | 2.457 | 0.132 |
| 202638_s_at                     | ICAM1                 | intercellular adhesion molecule 1 (CD54), human rhinovirus receptor                                                   | 1.823 | 0.132 |
| 225074_at                       | RAB2B                 | RAB2B, member RAS oncogene family                                                                                     | 1.925 | 0.132 |
| 242600_at                       | FRMD3                 | FERM domain containing 3                                                                                              | 2.699 | 0.132 |
| 227995_at                       | ---                   | MRNA; cDNA DKFZp564O0862 (from clone DKFZp564O0862)                                                                   | 1.739 | 0.132 |
| 213843_x_at                     | SLC6A8                | solute carrier family 6 (neurotransmitter transporter, creatine), member 8                                            | 2.321 | 0.132 |
| 214074_s_at                     | CTTN                  | cortactin                                                                                                             | 1.896 | 0.132 |
| 236012_at                       | ---                   | ---                                                                                                                   | 1.860 | 0.132 |
| 200887_s_at                     | STAT1                 | signal transducer and activator of transcription 1, 91kDa                                                             | 1.592 | 0.132 |
| 210112_at                       | HPS1                  | Hermansky-Pudlak syndrome 1                                                                                           | 2.070 | 0.132 |
| 209391_at                       | DPM2                  | dolichyl-phosphate mannosyltransferase polypeptide 2, regulatory subunit                                              | 2.211 | 0.132 |
| 229413_s_at                     | ---                   | ---                                                                                                                   | 2.845 | 0.132 |
| 208632_at                       | RNF10                 | ring finger protein 10 /// ring finger protein 10                                                                     | 2.747 | 0.132 |

## Supplementary table 1

## Upregulated transcripts

|              |                            |                                                                                                                      |       |       |
|--------------|----------------------------|----------------------------------------------------------------------------------------------------------------------|-------|-------|
| 213608_s_at  | CTB-1048E9.5               | similar to SRR1-like protein                                                                                         | 2.119 | 0.132 |
| 219546_at    | BMP2K                      | BMP2 inducible kinase                                                                                                | 1.770 | 0.132 |
| 212185_x_at  | MT2A                       | metallothionein 2A                                                                                                   | 1.679 | 0.132 |
| 207291_at    | PRRG4                      | proline rich Gla (G-carboxyglutamic acid) 4<br>(transmembrane)                                                       | 1.753 | 0.132 |
| 229151_at    | SLC14A1                    | Solute carrier family 14 (urea transporter), member 1<br>(Kidd blood group)                                          | 2.737 | 0.132 |
| 202219_at    | SLC6A8                     | solute carrier family 6 (neurotransmitter transporter,<br>creatine), member 8                                        | 2.386 | 0.132 |
| 1555503_a_at | TMCC2                      | transmembrane and coiled-coil domain family 2                                                                        | 4.012 | 0.132 |
| 225319_s_at  | FAM104A                    | family with sequence similarity 104, member A                                                                        | 1.988 | 0.132 |
| 235582_at    | E2F2                       | E2F transcription factor 2                                                                                           | 2.044 | 0.132 |
| 217736_s_at  | EIF2AK1                    | eukaryotic translation initiation factor 2-alpha kinase 1                                                            | 1.761 | 0.132 |
| 200628_s_at  | WARS                       | tryptophanyl-tRNA synthetase                                                                                         | 1.677 | 0.132 |
| 206548_at    | FLJ23556                   | hypothetical protein FLJ23556                                                                                        | 1.935 | 0.132 |
| 203817_at    | GUCY1B3                    | guanylate cyclase 1, soluble, beta 3                                                                                 | 2.014 | 0.132 |
| 219672_at    | ERAF                       | erythroid associated factor                                                                                          | 2.905 | 0.132 |
| 242281_at    | ---                        | ---                                                                                                                  | 2.100 | 0.132 |
| 223608_at    | EFCAB2                     | EF-hand calcium binding domain 2                                                                                     | 1.984 | 0.132 |
| 207042_at    | E2F2                       | E2F transcription factor 2                                                                                           | 4.175 | 0.132 |
| 1559663_at   | ACSL4                      | Acyl-CoA synthetase long-chain family member 4                                                                       | 1.891 | 0.132 |
| 221063_x_at  | RNF123                     | ring finger protein 123                                                                                              | 2.183 | 0.132 |
| 226726_at    | MBOAT2                     | membrane bound O-acyltransferase domain containing<br>2                                                              | 1.783 | 0.132 |
| 207387_s_at  | GK                         | glycerol kinase                                                                                                      | 1.717 | 0.132 |
| 221246_x_at  | TNS1                       | tensin 1 /// tensin 1                                                                                                | 2.121 | 0.132 |
| 206491_s_at  | NAPA                       | N-ethylmaleimide-sensitive factor attachment protein,<br>alpha                                                       | 1.590 | 0.132 |
| 202637_s_at  | ICAM1                      | intercellular adhesion molecule 1 (CD54), human<br>rhinovirus receptor                                               | 1.777 | 0.132 |
| 1559582_at   | RHOQ                       | ras homolog gene family, member Q                                                                                    | 1.617 | 0.132 |
| 210075_at    |                            | 2-Mar membrane-associated ring finger (C3HC4) 2                                                                      | 1.760 | 0.132 |
| 224186_s_at  | RNF123                     | ring finger protein 123                                                                                              | 1.990 | 0.132 |
| 221479_s_at  | BNIP3L                     | BCL2/adenovirus E1B 19kDa interacting protein 3-like<br>/// BCL2/adenovirus E1B 19kDa interacting protein 3-<br>like | 1.584 | 0.132 |
| 230036_at    | SAMD9L                     | sterile alpha motif domain containing 9-like                                                                         | 1.912 | 0.132 |
| 59644_at     | BMP2K                      | BMP2 inducible kinase                                                                                                | 1.784 | 0.132 |
| 242335_at    | SLC25A37                   | solute carrier family 25, member 37                                                                                  | 1.756 | 0.132 |
| 212845_at    | SAMD4A                     | sterile alpha motif domain containing 4A                                                                             | 1.956 | 0.132 |
| 209845_at    | MKRN1                      | makorin, ring finger protein, 1                                                                                      | 1.821 | 0.183 |
| 224818_at    | SORT1                      | sortilin 1                                                                                                           | 1.678 | 0.183 |
| 209807_s_at  | NFIX                       | nuclear factor I/X (CCAAT-binding transcription factor)                                                              | 1.851 | 0.183 |
| 239167_at    | AFF1                       | AF4/FMR2 family, member 1                                                                                            | 1.704 | 0.183 |
| 396_f_at     | EPOR                       | erythropoietin receptor                                                                                              | 1.672 | 0.183 |
| 224752_at    | LOC641845 ///<br>LOC647087 | hypothetical protein LOC641845 /// hypothetical<br>LOC647087                                                         | 1.686 | 0.183 |
| 215684_s_at  | ASCC2                      | activating signal cointegrator 1 complex subunit 2                                                                   | 1.963 | 0.183 |
| 203308_x_at  | HPS1                       | Hermansky-Pudlak syndrome 1                                                                                          | 1.869 | 0.183 |

## Supplementary table 1

## Upregulated transcripts

|              |           |                                                                                        |       |       |
|--------------|-----------|----------------------------------------------------------------------------------------|-------|-------|
| 35254_at     | TRAFD1    | TRAF-type zinc finger domain containing 1                                              | 1.569 | 0.183 |
| 221653_x_at  | APOL2     | apolipoprotein L, 2                                                                    | 1.675 | 0.183 |
| 209651_at    | TGFB1I1   | transforming growth factor beta 1 induced transcript 1                                 | 2.144 | 0.183 |
| 235175_at    | GBP4      | guanylate binding protein 4                                                            | 2.166 | 0.183 |
| 203911_at    | RAP1GAP   | RAP1 GTPase activating protein                                                         | 4.020 | 0.183 |
| 223094_s_at  | ANKH      | ankylosis, progressive homolog (mouse)                                                 | 2.293 | 0.183 |
|              | DEFA1 /// | defensin, alpha 1 ///                                                                  |       |       |
|              | DEFA3 /// | defensin, alpha 3, neutrophil-specific ///                                             |       |       |
| 205033_s_at  | LOC728358 | (HNP-1) (HP-1) (HP1) (Defensin, alpha 1)                                               | 2.470 | 0.183 |
| 216054_x_at  | MYL4      | myosin, light chain 4, alkali; atrial, embryonic                                       | 2.184 | 0.183 |
| 227309_at    | YOD1      | YOD1 OTU deubiquinating enzyme 1 homolog (S. cerevisiae)                               | 2.099 | 0.183 |
|              | GP1BB /// | glycoprotein Ib (platelet), beta polypeptide ///                                       |       |       |
| 209767_s_at  | SEPT5     | septin 5                                                                               | 1.565 | 0.183 |
| 209018_s_at  | PINK1     | PTEN induced putative kinase 1                                                         | 1.784 | 0.183 |
| 208751_at    | NAPA      | N-ethylmaleimide-sensitive factor attachment protein, alpha                            | 1.646 | 0.183 |
| 211794_at    | FYB       | FYN binding protein (FYB-120/130)                                                      | 1.582 | 0.183 |
| 243465_at    | TMEM140   | Transmembrane protein 140                                                              | 1.610 | 0.183 |
| 221425_s_at  | HBLD2     | HESB like domain containing 2 ///                                                      | 2.173 | 0.183 |
|              |           | HESB like domain containing 2                                                          |       |       |
| 207827_x_at  | SNCA      | synuclein, alpha (non A4 component of amyloid precursor)                               | 2.061 | 0.183 |
| 228361_at    | E2F2      | E2F transcription factor 2                                                             | 2.813 | 0.183 |
| 235396_at    | C22orf25  | Chromosome 22 open reading frame 25                                                    | 1.664 | 0.183 |
| 217475_s_at  | LIMK2     | LIM domain kinase 2                                                                    | 1.833 | 0.183 |
| 228775_at    | ---       | ---                                                                                    | 1.892 | 0.183 |
| 229778_at    | C12orf39  | Chromosome 12 open reading frame 39                                                    | 2.093 | 0.183 |
| 1558837_a_at | PLGLB1    | Plasminogen-like B1                                                                    | 1.731 | 0.183 |
| 1566959_at   | GAB2      | GRB2-associated binding protein 2                                                      | 1.942 | 0.183 |
| 212540_at    | CDC34     | cell division cycle 34 homolog (S. cerevisiae)                                         | 1.811 | 0.183 |
| 205856_at    | SLC14A1   | solute carrier family 14 (urea transporter), member 1 (Kidd blood group)               | 2.622 | 0.183 |
| 202426_s_at  | RXRA      | retinoid X receptor, alpha                                                             | 2.180 | 0.183 |
| 201904_s_at  | CTDSPL    | CTD (carboxy-terminal domain, RNA polymerase II, polypeptide A) small phosphatase-like | 2.162 | 0.183 |
| 204611_s_at  | PPP2R5B   | protein phosphatase 2, regulatory subunit B (B56), beta isoform                        | 1.549 | 0.183 |
| 214974_x_at  | CXCL5     | chemokine (C-X-C motif) ligand 5                                                       | 2.254 | 0.183 |
| 230505_at    | LOC145474 | hypothetical protein LOC145474                                                         | 1.770 | 0.183 |
| 1558688_at   | LOC441461 | hypothetical gene supported by BC030123                                                | 2.298 | 0.183 |
| 239555_at    | LYN       | V-yes-1 Yamaguchi sarcoma viral related oncogene homolog                               | 1.869 | 0.183 |
| 226757_at    | IFIT2     | interferon-induced protein with tetratricopeptide repeats 2                            | 1.707 | 0.183 |
| 229543_at    | RPL29     | Ribosomal protein L29 ///                                                              | 2.492 | 0.183 |
|              |           | Ribosomal protein L29                                                                  |       |       |
| 215087_at    | C15orf39  | chromosome 15 open reading frame 39                                                    | 1.936 | 0.183 |
| 239600_at    | SIPA1L1   | Signal-induced proliferation-associated 1 like 1                                       | 1.699 | 0.183 |
| 1566958_at   | GAB2      | GRB2-associated binding protein 2                                                      | 2.086 | 0.183 |
| 220757_s_at  | UBXD1     | UBX domain containing 1                                                                | 1.855 | 0.183 |

## Supplementary table 1

## Upregulated transcripts

|             |                                         |                                                                                                                                                                                                                                                                 |       |       |
|-------------|-----------------------------------------|-----------------------------------------------------------------------------------------------------------------------------------------------------------------------------------------------------------------------------------------------------------------|-------|-------|
| 204393_s_at | ACPP                                    | acid phosphatase, prostate                                                                                                                                                                                                                                      | 1.646 | 0.183 |
| 206834_at   | HBD                                     | hemoglobin, delta /// hemoglobin, delta                                                                                                                                                                                                                         | 2.973 | 0.183 |
| 212151_at   | PBX1                                    | Pre-B-cell leukemia transcription factor 1                                                                                                                                                                                                                      | 2.545 | 0.183 |
| 214464_at   | CDC42BPA                                | CDC42 binding protein kinase alpha (DMPK-like)                                                                                                                                                                                                                  | 2.662 | 0.183 |
| 40850_at    | FKBP8                                   | FK506 binding protein 8, 38kDa                                                                                                                                                                                                                                  | 2.036 | 0.183 |
| 211546_x_at | SNCA                                    | synuclein, alpha (non A4 component of amyloid precursor)                                                                                                                                                                                                        | 2.094 | 0.183 |
| 211456_x_at | LOC645745                               | metallothionein 1H-like protein                                                                                                                                                                                                                                 | 1.584 | 0.183 |
| 238725_at   | ---                                     | ---                                                                                                                                                                                                                                                             | 1.592 | 0.183 |
| 232610_at   | PARP14                                  | poly (ADP-ribose) polymerase family, member 14                                                                                                                                                                                                                  | 2.376 | 0.183 |
| 233072_at   | NTNG2                                   | netrin G2                                                                                                                                                                                                                                                       | 1.574 | 0.183 |
| 209417_s_at | IFI35                                   | interferon-induced protein 35                                                                                                                                                                                                                                   | 1.709 | 0.183 |
| 208255_s_at | FKBP8                                   | FK506 binding protein 8, 38kDa                                                                                                                                                                                                                                  | 2.115 | 0.183 |
| 217125_at   | ---                                     | ---                                                                                                                                                                                                                                                             | 2.039 | 0.183 |
| 213324_at   | SRC                                     | v-src sarcoma (Schmidt-Ruppin A-2) viral oncogene homolog (avian)                                                                                                                                                                                               | 1.750 | 0.183 |
| 235574_at   | GBP4                                    | guanylate binding protein 4                                                                                                                                                                                                                                     | 2.435 | 0.183 |
| 215812_s_at | SLC6A8 ///<br>SLC6A10P ///<br>LOC653562 | solute carrier family 6 (neurotransmitter transporter, creatine), member 8 /// solute carrier family 6 (neurotransmitter transporter, creatine), member 10 (pseudogene) /// similar to Sodium- and chloride-dependent creatine transporter 1 (CT1) (Creatine tr | 2.283 | 0.183 |
| 223649_s_at | SLC25A39                                | solute carrier family 25, member 39                                                                                                                                                                                                                             | 1.721 | 0.183 |
| 213439_x_at | RPIP8                                   | RaP2 interacting protein 8                                                                                                                                                                                                                                      | 4.034 | 0.183 |
| 239661_at   | AFF1                                    | AF4/FMR2 family, member 1                                                                                                                                                                                                                                       | 1.558 | 0.183 |
| 204993_at   | GNAZ                                    | guanine nucleotide binding protein (G protein), alpha z polypeptide                                                                                                                                                                                             | 1.812 | 0.183 |
| 241420_at   | LOC728262                               | Hypothetical protein LOC728262                                                                                                                                                                                                                                  | 6.244 | 0.183 |
| 211012_s_at | PML ///<br>LOC161527                    | promyelocytic leukemia /// hypothetical protein<br>LOC161527                                                                                                                                                                                                    | 1.614 | 0.183 |
| 212512_s_at | CARM1                                   | coactivator-associated arginine methyltransferase 1                                                                                                                                                                                                             | 1.981 | 0.183 |
| 214523_at   | CEBPE                                   | CCAAT/enhancer binding protein (C/EBP), epsilon                                                                                                                                                                                                                 | 1.677 | 0.183 |
| 215966_x_at | GK3P                                    | glycerol kinase 3 pseudogene                                                                                                                                                                                                                                    | 1.686 | 0.250 |
| 217144_at   | UBB ///<br>LOC648390                    | ubiquitin B /// similar to ubiquitin B precursor                                                                                                                                                                                                                | 2.585 | 0.250 |
| 216549_s_at | TBC1D22B                                | TBC1 domain family, member 22B                                                                                                                                                                                                                                  | 2.657 | 0.250 |
| 241849_at   | CD74                                    | CD74 molecule, major histocompatibility complex, class II invariant chain                                                                                                                                                                                       | 1.610 | 0.250 |
| 242267_x_at | NINJ2                                   | Ninjurin 2                                                                                                                                                                                                                                                      | 2.439 | 0.250 |
| 208087_s_at | ZBP1                                    | Z-DNA binding protein 1 /// Z-DNA binding protein 1                                                                                                                                                                                                             | 1.818 | 0.250 |
| 219090_at   | SLC24A3                                 | solute carrier family 24 (sodium/potassium/calcium exchanger), member 3                                                                                                                                                                                         | 2.134 | 0.250 |
| 213338_at   | TMEM158                                 | transmembrane protein 158                                                                                                                                                                                                                                       | 4.355 | 0.250 |
| 1558836_at  | PLGLB1                                  | Plasminogen-like B1                                                                                                                                                                                                                                             | 1.633 | 0.250 |
| 206123_at   | LLGL1                                   | lethal giant larvae homolog 1 (Drosophila)                                                                                                                                                                                                                      | 1.764 | 0.250 |
| 201178_at   | FBXO7                                   | F-box protein 7                                                                                                                                                                                                                                                 | 1.676 | 0.250 |
| 204042_at   | WASF3                                   | WAS protein family, member 3                                                                                                                                                                                                                                    | 1.741 | 0.250 |
| 234157_at   | WDFY1                                   | WD repeat and FYVE domain containing 1                                                                                                                                                                                                                          | 1.836 | 0.250 |
| 201052_s_at | PSMF1                                   | proteasome (prosome, macropain) inhibitor subunit 1 (PI31)                                                                                                                                                                                                      | 1.733 | 0.250 |
| 241948_at   | FAM122A                                 | Family with sequence similarity 122A                                                                                                                                                                                                                            | 1.596 | 0.250 |

## Supplementary table 1

## Upregulated transcripts

|              |          |                                                                                                                                                       |       |       |
|--------------|----------|-------------------------------------------------------------------------------------------------------------------------------------------------------|-------|-------|
| 223039_at    | C22orf13 | chromosome 22 open reading frame 13                                                                                                                   | 1.696 | 0.250 |
| 233591_at    | ---      | CDNA: FLJ23098 fis, clone LNG07440                                                                                                                    | 2.720 | 0.250 |
| 236216_at    | TCF7L2   | Transcription factor 7-like 2 (T-cell specific, HMG-box)                                                                                              | 1.809 | 0.250 |
| 57588_at     | SLC24A3  | solute carrier family 24 (sodium/potassium/calcium exchanger), member 3                                                                               | 1.975 | 0.250 |
| 235054_at    | NUDT16   | nudix (nucleoside diphosphate linked moiety X)-type motif 16                                                                                          | 1.516 | 0.250 |
| 202130_at    | RIOK3    | RIO kinase 3 (yeast) /// RIO kinase 3 (yeast)                                                                                                         | 1.542 | 0.250 |
| 209948_at    | KCNMB1   | potassium large conductance calcium-activated channel, subfamily M, beta member 1                                                                     | 1.700 | 0.250 |
| 242094_at    | ITGB3    | Integrin, beta 3 (platelet glycoprotein IIIa, antigen CD61)                                                                                           | 1.663 | 0.250 |
| 1552309_a_at | NEXN     | nexilin (F actin binding protein)                                                                                                                     | 1.853 | 0.250 |
| 216336_x_at  | MT1M     | metallothionein 1M                                                                                                                                    | 1.541 | 0.250 |
| 226152_at    | TTC7B    | tetratricopeptide repeat domain 7B                                                                                                                    | 2.076 | 0.250 |
| 205451_at    | MLLT7    | myeloid/lymphoid or mixed-lineage leukemia (trithorax homolog, Drosophila); translocated to, 7                                                        | 1.827 | 0.250 |
| 206513_at    | AIM2     | absent in melanoma 2                                                                                                                                  | 2.005 | 0.250 |
| 210582_s_at  | LIMK2    | LIM domain kinase 2                                                                                                                                   | 1.693 | 0.250 |
| 230942_at    | CMTM5    | CKLF-like MARVEL transmembrane domain containing 5                                                                                                    | 2.605 | 0.250 |
| 37408_at     | MRC2     | mannose receptor, C type 2                                                                                                                            | 2.211 | 0.250 |
| 219716_at    | APOL6    | apolipoprotein L, 6                                                                                                                                   | 1.951 | 0.250 |
| 206025_s_at  | TNFAIP6  | tumor necrosis factor, alpha-induced protein 6                                                                                                        | 2.036 | 0.250 |
| 214681_at    | GK       | glycerol kinase                                                                                                                                       | 1.610 | 0.250 |
| 225119_at    | CHMP4B   | chromatin modifying protein 4B                                                                                                                        | 1.884 | 0.250 |
| 231038_s_at  | ---      | Transcribed locus, strongly similar to NP_001028866.1 regulatory element binding factor 2 [Rattus norvegicus]                                         | 1.909 | 0.250 |
| 203966_s_at  | PPM1A    | protein phosphatase 1A (formerly 2C), magnesium-dependent, alpha isoform /// protein phosphatase 1A (formerly 2C), magnesium-dependent, alpha isoform | 1.598 | 0.250 |
| 204081_at    | NRGN     | neurogranin (protein kinase C substrate, RC3)                                                                                                         | 1.890 | 0.250 |
| 1556590_s_at | ---      | CDNA FLJ25645 fis, clone SYN00113                                                                                                                     | 2.551 | 0.250 |
| 207815_at    | PF4V1    | platelet factor 4 variant 1                                                                                                                           | 3.899 | 0.250 |
| 1555659_a_at | TREML1   | triggering receptor expressed on myeloid cells-like 1                                                                                                 | 2.298 | 0.250 |
| 211433_x_at  | KIAA1539 | KIAA1539                                                                                                                                              | 1.547 | 0.250 |
| 205099_s_at  | CCR1     | chemokine (C-C motif) receptor 1                                                                                                                      | 1.678 | 0.250 |
| 202555_s_at  | MYLK     | myosin, light chain kinase /// myosin, light chain kinase                                                                                             | 2.005 | 0.250 |
| 200615_s_at  | AP2B1    | adaptor-related protein complex 2, beta 1 subunit                                                                                                     | 1.848 | 0.250 |
| 212086_x_at  | LMNA     | lamin A/C                                                                                                                                             | 1.547 | 0.250 |
| 207414_s_at  | PCSK6    | proprotein convertase subtilisin/kexin type 6                                                                                                         | 3.004 | 0.250 |
| 205463_s_at  | PDGFA    | platelet-derived growth factor alpha polypeptide                                                                                                      | 1.750 | 0.250 |
| 200665_s_at  | SPARC    | secreted protein, acidic, cysteine-rich (osteonectin) /// secreted protein, acidic, cysteine-rich (osteonectin)                                       | 2.057 | 0.250 |
| 201161_s_at  | CSDA     | cold shock domain protein A                                                                                                                           | 1.859 | 0.250 |
| 202456_s_at  | ZYG11BL  | zyg-11 homolog B (C. elegans)-like                                                                                                                    | 1.950 | 0.250 |

|              |          |                                                                                                                       |       |       |
|--------------|----------|-----------------------------------------------------------------------------------------------------------------------|-------|-------|
| 235512_at    | CDKL1    | Cyclin-dependent kinase-like 1 (CDC2-related kinase)                                                                  | 1.715 | 0.250 |
| 200075_s_at  | GUK1     | guanylate kinase 1 /// guanylate kinase 1                                                                             | 1.578 | 0.250 |
| 219622_at    | RAB20    | RAB20, member RAS oncogene family                                                                                     | 1.890 | 0.250 |
| 226603_at    | SAMD9L   | sterile alpha motif domain containing 9-like                                                                          | 1.788 | 0.250 |
| 208416_s_at  | SPTB     | spectrin, beta, erythrocytic (includes spherocytosis, clinical type I)                                                | 2.742 | 0.250 |
| 1556764_s_at | PDE4D    | Phosphodiesterase 4D, cAMP-specific (phosphodiesterase E3 dunce homolog, Drosophila)                                  | 2.597 | 0.250 |
| 201798_s_at  | FER1L3   | fer-1-like 3, myoferlin (C. elegans)                                                                                  | 1.943 | 0.250 |
| 202387_at    | BAG1     | BCL2-associated athanogene /// BCL2-associated athanogene                                                             | 1.781 | 0.250 |
| 228214_at    | ---      | Transcribed locus                                                                                                     | 5.136 | 0.250 |
| 214020_x_at  | ITGB5    | Integrin, beta 5                                                                                                      | 1.657 | 0.250 |
| 241154_x_at  | MTSS1    | Metastasis suppressor 1                                                                                               | 1.594 | 0.250 |
| 31874_at     | GAS2L1   | growth arrest-specific 2 like 1                                                                                       | 1.757 | 0.250 |
| 239210_at    | PBX1     | Pre-B-cell leukemia transcription factor 1                                                                            | 6.905 | 0.250 |
| 1554334_a_at | DNAJA4   | DnaJ (Hsp40) homolog, subfamily A, member 4                                                                           | 2.110 | 0.250 |
| 222678_s_at  | DCUN1D1  | DCN1, defective in cullin neddylation 1, domain containing 1 (S. cerevisiae)                                          | 1.818 | 0.250 |
| 201334_s_at  | ARHGEF12 | Rho guanine nucleotide exchange factor (GEF) 12                                                                       | 2.080 | 0.250 |
| 209641_s_at  | ABCC3    | ATP-binding cassette, sub-family C (CFTR/MRP), member 3                                                               | 1.714 | 0.250 |
| 204467_s_at  | SNCA     | synuclein, alpha (non A4 component of amyloid precursor) /// synuclein, alpha (non A4 component of amyloid precursor) | 2.035 | 0.250 |
| 203827_at    | WIP1     | WD repeat domain, phosphoinositide interacting 1                                                                      | 1.540 | 0.250 |
| 229736_at    | TMEM86B  | transmembrane protein 86B                                                                                             | 2.085 | 0.341 |
| 205067_at    | IL1B     | interleukin 1, beta                                                                                                   | 1.601 | 0.341 |
| 209019_s_at  | PINK1    | PTEN induced putative kinase 1                                                                                        | 1.567 | 0.341 |
| 243463_s_at  | RIT1     | Ras-like without CAAX 1                                                                                               | 2.503 | 0.341 |
| 226184_at    | FMNL2    | formin-like 2                                                                                                         | 1.967 | 0.341 |
| 215449_at    | BZRPL1   | benzodiazapine receptor (peripheral)-like 1                                                                           | 2.384 | 0.341 |
| 39402_at     | IL1B     | interleukin 1, beta                                                                                                   | 1.582 | 0.341 |
| 212705_x_at  | PNPLA2   | patatin-like phospholipase domain containing 2                                                                        | 1.661 | 0.341 |
| 224898_at    | WDR26    | WD repeat domain 26                                                                                                   | 1.669 | 0.341 |
| 200696_s_at  | GSN      | gelsolin (amyloidosis, Finnish type)                                                                                  | 1.575 | 0.341 |
| 202364_at    | MXI1     | MAX interactor 1 /// MAX interactor 1                                                                                 | 1.865 | 0.341 |
| 239853_at    | KLC3     | kinesin light chain 3                                                                                                 | 2.980 | 0.341 |
| 227014_at    | ASPHD2   | aspartate beta-hydroxylase domain containing 2                                                                        | 1.735 | 0.341 |
| 223012_at    | UBXD1    | UBX domain containing 1                                                                                               | 1.678 | 0.341 |
| 235756_at    | SAMD4A   | Sterile alpha motif domain containing 4A                                                                              | 1.992 | 0.341 |
| 219695_at    | SMPD3    | sphingomyelin phosphodiesterase 3, neutral membrane (neutral sphingomyelinase II)                                     | 2.086 | 0.341 |
| 202129_s_at  | RIOK3    | RIO kinase 3 (yeast) /// RIO kinase 3 (yeast)                                                                         | 2.011 | 0.341 |
| 208161_s_at  | ABCC3    | ATP-binding cassette, sub-family C (CFTR/MRP), member 3                                                               | 1.970 | 0.341 |
| 223832_s_at  | CAPNS2   | calpain, small subunit 2                                                                                              | 1.677 | 0.341 |
| 201125_s_at  | ITGB5    | integrin, beta 5                                                                                                      | 1.959 | 0.341 |
| 635_s_at     | PPP2R5B  | protein phosphatase 2, regulatory subunit B (B56), beta isoform                                                       | 1.608 | 0.341 |

## Supplementary table 1

## Upregulated transcripts

|              |           |                                                                                                  |       |       |
|--------------|-----------|--------------------------------------------------------------------------------------------------|-------|-------|
| 225239_at    | ---       | CDNA FLJ26120 fis, clone SYN00419                                                                | 1.737 | 0.341 |
| 236707_at    | DAPP1     | dual adaptor of phosphotyrosine and 3-phosphoinositides                                          | 1.749 | 0.341 |
| 203196_at    | ABCC4     | ATP-binding cassette, sub-family C (CFTR/MRP), member 4                                          | 1.547 | 0.341 |
| 201058_s_at  | MYL9      | myosin, light chain 9, regulatory                                                                | 2.929 | 0.341 |
| 232522_at    | TCF7L2    | Transcription factor 7-like 2 (T-cell specific, HMG-box)                                         | 1.886 | 0.341 |
| 202201_at    | BLVRB     | biliverdin reductase B (flavin reductase (NADPH))                                                | 1.746 | 0.341 |
| 206283_s_at  | TAL1      | T-cell acute lymphocytic leukemia 1                                                              | 2.569 | 0.341 |
| 223121_s_at  | SFRP2     | secreted frizzled-related protein 2                                                              | 4.125 | 0.341 |
| 215977_x_at  | GK        | glycerol kinase                                                                                  | 1.747 | 0.341 |
| 212055_at    | C18orf10  | chromosome 18 open reading frame 10                                                              | 2.367 | 0.341 |
| 240630_at    | RARA      | Retinoic acid receptor, alpha                                                                    | 1.650 | 0.341 |
| 202947_s_at  | GYPC      | glycophorin C (Gerbich blood group)                                                              | 1.598 | 0.341 |
| 212472_at    | MICAL2    | microtubule associated monooxygenase, calponin and LIM domain containing 2                       | 1.781 | 0.341 |
| 237299_at    | ---       | Transcribed locus                                                                                | 2.787 | 0.341 |
| 221809_at    | RANBP10   | RAN binding protein 10                                                                           | 1.869 | 0.341 |
| 225252_at    | SRXN1     | sulfiredoxin 1 homolog (S. cerevisiae)                                                           | 1.688 | 0.341 |
| 227798_at    | SMAD1     | SMAD family member 1                                                                             | 1.595 | 0.341 |
| 225102_at    | MGLL      | monoglyceride lipase                                                                             | 1.614 | 0.341 |
| 206026_s_at  | TNFAIP6   | tumor necrosis factor, alpha-induced protein 6                                                   | 1.926 | 0.341 |
| 232579_at    | ---       | CDNA: FLJ22719 fis, clone HSI14307                                                               | 2.286 | 0.341 |
| 209217_s_at  | WDR45     | WD repeat domain 45                                                                              | 1.653 | 0.341 |
| 219202_at    | RHBDF2    | rhomboid 5 homolog 2 (Drosophila)                                                                | 1.511 | 0.341 |
| 1569095_at   | LOC731424 | hypothetical protein LOC731424                                                                   | 2.084 | 0.341 |
| 225271_at    | TMEM63B   | transmembrane protein 63B                                                                        | 1.786 | 0.341 |
| 201059_at    | CTTN      | cortactin                                                                                        | 2.193 | 0.341 |
| 210088_x_at  | MYL4      | myosin, light chain 4, alkali; atrial, embryonic                                                 | 2.039 | 0.341 |
| 1555068_at   | WNK1      | WNK lysine deficient protein kinase 1                                                            | 2.181 | 0.341 |
| 212077_at    | CALD1     | caldesmon 1                                                                                      | 2.339 | 0.341 |
| 226071_at    | ADAMTSL4  | ADAMTS-like 4                                                                                    | 1.723 | 0.341 |
| 209992_at    | PFKFB2    | 6-phosphofructo-2-kinase/fructose-2,6-biphosphatase 2                                            | 1.528 | 0.341 |
| 213288_at    | MBOAT2    | membrane bound O-acyltransferase domain containing 2                                             | 1.746 | 0.341 |
| 207357_s_at  | GALNT10   | UDP-N-acetyl-alpha-D-galactosamine:polypeptide N-acetylgalactosaminyltransferase 10 (GalNAc-T10) | 1.519 | 0.341 |
| 1554423_a_at | FBXO7     | F-box protein 7                                                                                  | 1.613 | 0.341 |
| 221962_s_at  | UBE2H     | ubiquitin-conjugating enzyme E2H (UBC8 homolog, yeast)                                           | 1.933 | 0.341 |
| 202500_at    | DNAJB2    | DnaJ (Hsp40) homolog, subfamily B, member 2                                                      | 1.864 | 0.341 |
| 215150_at    | YOD1      | YOD1 OTU deubiquinating enzyme 1 homolog (S. cerevisiae)                                         | 2.062 | 0.341 |
| 210610_at    | CEACAM1   | carcinoembryonic antigen-related cell adhesion molecule 1 (biliary glycoprotein)                 | 1.787 | 0.341 |
| 1555680_a_at | SMOX      | spermine oxidase                                                                                 | 2.191 | 0.341 |
| 236155_at    | ZCCHC6    | Zinc finger, CCHC domain containing 6                                                            | 1.510 | 0.341 |
| 205127_at    | PTGS1     | prostaglandin-endoperoxide synthase 1 (prostaglandin G/H synthase and cyclooxygenase)            | 2.315 | 0.341 |

|              |             |                                                                                        |       |       |
|--------------|-------------|----------------------------------------------------------------------------------------|-------|-------|
| 225800_at    | JAZF1       | JAZF zinc finger 1                                                                     | 2.103 | 0.341 |
| 228362_s_at  | RP1-93H18.5 | Hypothetical protein LOC441168                                                         | 2.693 | 0.341 |
| 203394_s_at  | HES1        | hairy and enhancer of split 1, (Drosophila)                                            | 1.919 | 0.341 |
| 208335_s_at  | DARC        | Duffy blood group, chemokine receptor                                                  | 3.577 | 0.341 |
| 210999_s_at  | GRB10       | growth factor receptor-bound protein 10                                                | 1.527 | 0.341 |
| 211820_x_at  | GYP A       | glycophorin A (MNS blood group)                                                        | 2.643 | 0.341 |
| 211026_s_at  | MGLL        | monoglyceride lipase /// monoglyceride lipase                                          | 1.994 | 0.341 |
| 228273_at    | ---         | Transcribed locus                                                                      | 1.640 | 0.341 |
| 221345_at    | FFAR2       | free fatty acid receptor 2                                                             | 1.619 | 0.341 |
| 227959_at    | ---         | Transcribed locus                                                                      | 4.257 | 0.341 |
| 228195_at    | MGC13057    | hypothetical protein MGC13057                                                          | 1.798 | 0.341 |
| 202452_at    | ZYG11BL     | zyg-11 homolog B (C. elegans)-like                                                     | 1.871 | 0.341 |
| 228618_at    | PEAR1       | platelet endothelial aggregation receptor 1                                            | 1.536 | 0.341 |
| 213836_s_at  | WIPI1       | WD repeat domain, phosphoinositide interacting 1                                       | 1.545 | 0.341 |
| 205253_at    | PBX1        | pre-B-cell leukemia transcription factor 1                                             | 1.937 | 0.341 |
| 204439_at    | IFI44L      | interferon-induced protein 44-like                                                     | 2.583 | 0.341 |
| 221049_s_at  | POLL        | polymerase (DNA directed), lambda                                                      | 1.725 | 0.341 |
| 208791_at    | CLU         | clusterin                                                                              | 1.941 | 0.341 |
| 234643_x_at  | ---         | CDNA: FLJ21798 fis, clone HEP00573                                                     | 1.700 | 0.341 |
| 207793_s_at  | EPB41       | erythrocyte membrane protein band 4.1 (elliptocytosis 1, RH-linked)                    | 2.084 | 0.341 |
| 219905_at    | ERMAP       | erythroblast membrane-associated protein (Scianna blood group)                         | 1.695 | 0.341 |
| 1557538_at   | THRAP2      | Thyroid hormone receptor associated protein 2                                          | 1.508 | 0.341 |
| 241133_at    | ---         | CDNA FLJ35984 fis, clone TEST12014097, highly similar to V_segment translation product | 2.360 | 0.503 |
| 203289_s_at  | C16orf35    | chromosome 16 open reading frame 35                                                    | 2.625 | 0.503 |
| 239412_at    | IRF5        | interferon regulatory factor 5                                                         | 2.390 | 0.503 |
| 200954_at    | ATP6V0C     | ATPase, H+ transporting, lysosomal 16kDa, V0 subunit c                                 | 1.617 | 0.503 |
| 202131_s_at  | RIOK3       | RIO kinase 3 (yeast) /// RIO kinase 3 (yeast)                                          | 1.876 | 0.503 |
| 1557418_at   | ACSL4       | Acyl-CoA synthetase long-chain family member 4                                         | 1.843 | 0.503 |
| 233375_at    | EFCAB2      | EF-hand calcium binding domain 2                                                       | 3.064 | 0.503 |
| 211475_s_at  | BAG1        | BCL2-associated athanogene                                                             | 1.640 | 0.503 |
| 203819_s_at  | IGF2BP3     | insulin-like growth factor 2 mRNA binding protein 3                                    | 1.535 | 0.503 |
| 242601_at    | LOC253012   | hypothetical protein LOC253012                                                         | 2.808 | 0.503 |
| 207667_s_at  | MAP2K3      | mitogen-activated protein kinase kinase 3                                              | 1.743 | 0.503 |
| 241041_at    | SLC8A1      | Solute carrier family 8 (sodium/calcium exchanger), member 1                           | 1.813 | 0.503 |
| 208949_s_at  | LGALS3      | lectin, galactoside-binding, soluble, 3 (galectin 3)                                   | 1.692 | 0.503 |
| 208792_s_at  | CLU         | clusterin                                                                              | 1.856 | 0.503 |
| 201563_at    | SORD        | sorbitol dehydrogenase                                                                 | 1.620 | 0.503 |
| 227062_at    | TncRNA      | trophoblast-derived noncoding RNA                                                      | 2.528 | 0.503 |
| 1555724_s_at | TAGLN       | transgelin                                                                             | 1.810 | 0.503 |
| 206171_at    | ADORA3      | adenosine A3 receptor                                                                  | 2.051 | 0.503 |
| 241433_at    | RCOR3       | REST corepressor 3                                                                     | 3.609 | 0.503 |
| 231780_at    | GBGT1       | globoside alpha-1,3-N-acetylgalactosaminyltransferase 1                                | 1.545 | 0.503 |
| 201053_s_at  | PSMF1       | proteasome (prosome, macropain) inhibitor subunit 1 (PI31)                             | 1.589 | 0.503 |
| 1567219_at   | ---         | ---                                                                                    | 1.529 | 0.503 |

|              |               |                                                                                                    |       |       |
|--------------|---------------|----------------------------------------------------------------------------------------------------|-------|-------|
| 220712_at    | C8orf60       | chromosome 8 open reading frame 60                                                                 | 1.642 | 0.503 |
| 1553842_at   | CXorf20       | chromosome X open reading frame 20                                                                 | 1.786 | 0.503 |
| 242020_s_at  | ZBP1          | Z-DNA binding protein 1                                                                            | 1.787 | 0.503 |
| 224982_at    | AKT1S1        | AKT1 substrate 1 (proline-rich)                                                                    | 1.601 | 0.503 |
| 219863_at    | HERC5         | hect domain and RLD 5                                                                              | 1.814 | 0.503 |
| 1553976_a_at | RP11-529I10.4 | deleted in a mouse model of primary ciliary dyskinesia                                             | 2.041 | 0.503 |
| 238669_at    | PTGS1         | prostaglandin-endoperoxide synthase 1 (prostaglandin G/H synthase and cyclooxygenase)              | 1.768 | 0.503 |
| 1565483_at   | EGFR          | epidermal growth factor receptor (erythroblastic leukemia viral (v-erb-b) oncogene homolog, avian) | 2.909 | 0.503 |
| 227180_at    | ELOVL7        | ELOVL family member 7, elongation of long chain fatty acids (yeast)                                | 2.016 | 0.503 |
| 236313_at    | CDKN2B        | cyclin-dependent kinase inhibitor 2B (p15, inhibits CDK4)                                          | 1.527 | 0.503 |
| 207206_s_at  | ALOX12        | arachidonate 12-lipoxygenase                                                                       | 2.070 | 0.503 |
| 1558152_at   | TSPAN4        | Tetraspanin 4                                                                                      | 1.616 | 0.503 |
| 240498_at    | ETV6          | Ets variant gene 6 (TEL oncogene)                                                                  | 1.776 | 0.503 |
| 228152_s_at  | FLJ31033      | hypothetical protein FLJ31033                                                                      | 1.545 | 0.503 |
| 1556896_at   | LOC284751     | hypothetical protein LOC284751                                                                     | 2.218 | 0.503 |
| 200896_x_at  | HDGF          | hepatoma-derived growth factor (high-mobility group protein 1-like)                                | 1.560 | 0.503 |
| 217933_s_at  | LAP3          | leucine aminopeptidase 3                                                                           | 1.879 | 0.503 |
| 53987_at     | RANBP10       | RAN binding protein 10                                                                             | 1.715 | 0.503 |
| 210395_x_at  | MYL4          | myosin, light chain 4, alkali; atrial, embryonic                                                   | 2.043 | 0.503 |
| 235684_s_at  | SESN3         | sestrin 3                                                                                          | 1.729 | 0.503 |
| 219799_s_at  | DHRS9         | dehydrogenase/reductase (SDR family) member 9                                                      | 2.198 | 0.503 |
| 1557116_at   | APOL6         | apolipoprotein L, 6                                                                                | 1.603 | 0.503 |
| 218818_at    | FHL3          | four and a half LIM domains 3                                                                      | 1.635 | 0.503 |
| 212797_at    | SORT1         | sortilin 1                                                                                         | 1.577 | 0.503 |
| 201365_at    | OAZ2          | ornithine decarboxylase antizyme 2                                                                 | 1.654 | 0.503 |
| 215813_s_at  | PTGS1         | prostaglandin-endoperoxide synthase 1 (prostaglandin G/H synthase and cyclooxygenase)              | 1.774 | 0.503 |
| 214992_s_at  | DNASE2        | deoxyribonuclease II, lysosomal                                                                    | 1.562 | 0.503 |
| 238513_at    | PRRG4         | Proline rich Gla (G-carboxyglutamic acid) 4 (transmembrane)                                        | 1.561 | 0.503 |
| 1557236_at   | APOL6         | apolipoprotein L, 6                                                                                | 1.736 | 0.503 |
| 202284_s_at  | CDKN1A        | cyclin-dependent kinase inhibitor 1A (p21, Cip1)                                                   | 1.585 | 0.503 |
| 242596_at    | ---           | Transcribed locus                                                                                  | 1.518 | 0.503 |
| 210044_s_at  | LYL1          | lymphoblastic leukemia derived sequence 1                                                          | 1.612 | 0.503 |
| 204533_at    | CXCL10        | chemokine (C-X-C motif) ligand 10                                                                  | 2.835 | 0.503 |
| 217799_x_at  | UBE2H         | ubiquitin-conjugating enzyme E2H (UBC8 homolog, yeast)                                             | 1.849 | 0.503 |
| 212651_at    | RHOBTB1       | Rho-related BTB domain containing 1                                                                | 2.021 | 0.503 |
| 204067_at    | SUOX          | sulfite oxidase                                                                                    | 1.503 | 0.503 |
| 237588_at    | SMCHD1        | Structural maintenance of chromosomes flexible hinge domain containing 1                           | 2.066 | 0.503 |
| 205241_at    | SCO2          | SCO cytochrome oxidase deficient homolog 2 (yeast)                                                 | 1.770 | 0.503 |
| 229548_at    | UNC84B        | Unc-84 homolog B (C. elegans)                                                                      | 1.625 | 0.503 |
| 219316_s_at  | C14orf58      | chromosome 14 open reading frame 58                                                                | 1.543 | 0.503 |

## Supplementary table 1

## Upregulated transcripts

|              |           |                                                                                  |       |       |
|--------------|-----------|----------------------------------------------------------------------------------|-------|-------|
| 217882_at    | TMEM111   | transmembrane protein 111                                                        | 1.639 | 0.503 |
| 223123_s_at  | C1orf128  | chromosome 1 open reading frame 128                                              | 2.135 | 0.503 |
| 242390_at    | WDFY1     | WD repeat and FYVE domain containing 1                                           | 1.652 | 0.503 |
| 206275_s_at  | MICAL2    | microtubule associated monooxygenase, calponin and LIM domain containing 2       | 1.993 | 0.503 |
| 1561654_at   | LIMK2     | LIM domain kinase 2                                                              | 1.671 | 0.679 |
| 230778_at    | ---       | Transcribed locus                                                                | 2.025 | 0.679 |
| 206461_x_at  | MT1H      | metallothionein 1H                                                               | 1.510 | 0.679 |
| 212974_at    | DENND3    | DENN/MADD domain containing 3                                                    | 2.664 | 0.679 |
| 209729_at    | GAS2L1    | growth arrest-specific 2 like 1                                                  | 1.638 | 0.679 |
| 204745_x_at  | MT1G      | metallothionein 1G                                                               | 1.546 | 0.679 |
| 230214_at    | MRV11     | murine retrovirus integration site 1 homolog                                     | 3.160 | 0.679 |
| 1560262_at   | LRR32     | Leucine rich repeat containing 32                                                | 1.946 | 0.679 |
| 213274_s_at  | CTSB      | cathepsin B                                                                      | 1.812 | 0.679 |
| 230546_at    | VASH1     | vasohibin 1                                                                      | 1.561 | 0.679 |
| 1558770_a_at | C17orf38  | chromosome 17 open reading frame 38                                              | 2.033 | 0.679 |
| 206493_at    | ITGA2B    | integrin, alpha 2b (platelet glycoprotein IIb of IIb/IIIa complex, antigen CD41) | 2.124 | 0.679 |
| 229996_s_at  | PCGF5     | Polycomb group ring finger 5                                                     | 2.129 | 0.679 |
| 217502_at    | IFIT2     | interferon-induced protein with tetratricopeptide repeats 2                      | 1.788 | 0.679 |
| 240652_at    | ---       | ---                                                                              | 1.645 | 0.679 |
| 205012_s_at  | HAGH      | hydroxyacylglutathione hydrolase                                                 | 1.627 | 0.679 |
| 210036_s_at  | KCNH2     | potassium voltage-gated channel, subfamily H (eag-related), member 2             | 1.928 | 0.679 |
| 1553861_at   | TCP11L2   | t-complex 11 (mouse)-like 2                                                      | 1.877 | 0.679 |
| 213825_at    | OLIG2     | oligodendrocyte lineage transcription factor 2                                   | 2.894 | 0.679 |
| 225874_at    | FAM100A   | family with sequence similarity 100, member A                                    | 1.613 | 0.679 |
| 227250_at    | KREMEN1   | kringle containing transmembrane protein 1                                       | 2.588 | 0.679 |
| 220122_at    | MCTP1     | multiple C2 domains, transmembrane 1                                             | 1.592 | 0.679 |
| 65086_at     | YIPF2     | Yip1 domain family, member 2                                                     | 1.523 | 0.679 |
| 1568513_x_at | PRSS1     | Protease, serine, 1 (trypsin 1)                                                  | 1.554 | 0.679 |
| 210357_s_at  | SMOX      | spermine oxidase                                                                 | 1.829 | 0.679 |
| 225354_s_at  | SH3BGRL2  | SH3 domain binding glutamic acid-rich protein like 2                             | 1.969 | 0.679 |
| 204780_s_at  | FAS       | Fas (TNF receptor superfamily, member 6)                                         | 1.519 | 0.679 |
| 220694_at    | DDEF1IT1  | DDEF1 intronic transcript 1                                                      | 1.593 | 0.679 |
| 221680_s_at  | ETV7      | ets variant gene 7 (TEL2 oncogene)                                               | 3.641 | 0.679 |
| 218999_at    | TMEM140   | transmembrane protein 140                                                        | 1.534 | 0.679 |
| 210987_x_at  | TPM1      | tropomyosin 1 (alpha)                                                            | 1.501 | 0.679 |
| 217167_x_at  | GK        | glycerol kinase                                                                  | 1.608 | 0.679 |
| 206539_s_at  | CYP4F12   | cytochrome P450, family 4, subfamily F, polypeptide 12                           | 1.628 | 0.679 |
| 205632_s_at  | PIP5K1B   | phosphatidylinositol-4-phosphate 5-kinase, type I, beta                          | 1.838 | 0.679 |
| 214273_x_at  | C16orf35  | chromosome 16 open reading frame 35                                              | 2.229 | 0.679 |
| 227088_at    | PDE5A     | phosphodiesterase 5A, cGMP-specific                                              | 1.876 | 0.679 |
| 222793_at    | DDX58     | DEAD (Asp-Glu-Ala-Asp) box polypeptide 58                                        | 1.649 | 0.679 |
| 1555021_a_at | SCARF1    | scavenger receptor class F, member 1                                             | 1.512 | 0.679 |
| 203309_s_at  | HPS1      | Hermansky-Pudlak syndrome 1                                                      | 1.761 | 0.679 |
| 226702_at    | LOC129607 | hypothetical protein LOC129607                                                   | 1.877 | 0.679 |
| 223828_s_at  | LGALS12   | lectin, galactoside-binding, soluble, 12 (galectin 12)                           | 1.541 | 0.679 |

|              |                 |                                                                                                  |       |       |
|--------------|-----------------|--------------------------------------------------------------------------------------------------|-------|-------|
| 212531_at    | LCN2            | lipocalin 2 (oncogene 24p3)                                                                      | 1.953 | 0.679 |
| 1562321_at   | PKD4            | pyruvate dehydrogenase kinase, isozyme 4                                                         | 1.817 | 0.679 |
| 217507_at    | SLC11A1         | solute carrier family 11 (proton-coupled divalent metal ion transporters), member 1              | 2.175 | 0.679 |
| 1554333_at   | DNAJA4          | DnaJ (Hsp40) homolog, subfamily A, member 4                                                      | 2.276 | 0.679 |
| 223375_at    | TBC1D22B        | TBC1 domain family, member 22B                                                                   | 1.622 | 0.679 |
| 200649_at    | NUCB1           | nucleobindin 1                                                                                   | 1.519 | 0.679 |
| 234973_at    | SLC38A5         | solute carrier family 38, member 5                                                               | 2.169 | 0.679 |
| 226179_at    | SLC25A37        | solute carrier family 25, member 37                                                              | 1.612 | 0.679 |
| 1554574_a_at | CYB5R3          | cytochrome b5 reductase 3                                                                        | 1.539 | 0.679 |
| 208916_at    | SLC1A5          | solute carrier family 1 (neutral amino acid transporter), member 5                               | 1.662 | 0.679 |
| 228278_at    | NFIX            | nuclear factor I/X (CCAAT-binding transcription factor)                                          | 1.529 | 0.679 |
| 221477_s_at  | MGC5618         | hypothetical protein MGC5618                                                                     | 1.841 | 0.679 |
| 238505_at    | ADPRH           | ADP-ribosylarginine hydrolase                                                                    | 1.522 | 0.679 |
| 211702_s_at  | USP32           | ubiquitin specific peptidase 32 /// ubiquitin specific peptidase 32                              | 1.576 | 0.679 |
| 206857_s_at  | FKBP1B          | FK506 binding protein 1B, 12.6 kDa                                                               | 1.867 | 0.679 |
| 221675_s_at  | CHPT1           | choline phosphotransferase 1                                                                     | 1.661 | 0.679 |
| 204494_s_at  | C15orf39        | chromosome 15 open reading frame 39                                                              | 1.548 | 0.679 |
| 235157_at    | PARP14          | Poly (ADP-ribose) polymerase family, member 14                                                   | 1.899 | 0.679 |
| 216316_x_at  | GK /// GK3P     | glycerol kinase /// glycerol kinase 3 pseudogene                                                 | 1.607 | 0.679 |
| 206494_s_at  | ITGA2B          | integrin, alpha 2b (platelet glycoprotein IIb of IIb/IIIa complex, antigen CD41)                 | 2.225 | 0.679 |
| 234897_s_at  | C6orf21         | chromosome 6 open reading frame 21                                                               | 1.768 | 0.679 |
| 241202_at    | GALNT10         | UDP-N-acetyl-alpha-D-galactosamine:polypeptide N-acetylgalactosaminyltransferase 10 (GalNAc-T10) | 1.742 | 0.679 |
| 238515_at    | ---             | CDNA FLJ34034 fis, clone FCBBF2004671                                                            | 1.530 | 0.679 |
| 226009_at    | RP11-529I10.4   | deleted in a mouse model of primary ciliary dyskinesia                                           | 1.753 | 0.925 |
| 221160_s_at  | CABP3 /// CABP5 | calcium binding protein 3 /// calcium binding protein 5                                          | 1.950 | 0.925 |
| 215242_at    | PIGC            | phosphatidylinositol glycan anchor biosynthesis, class C                                         | 5.315 | 0.925 |
| 243352_at    | ALPK1           | alpha-kinase 1                                                                                   | 2.019 | 0.925 |
| 214428_x_at  | C4A /// C4B     | complement component 4A (Rodgers blood group) /// complement component 4B (Childo blood group)   | 2.395 | 0.925 |
| 231990_at    | USP15           | ubiquitin specific peptidase 15                                                                  | 1.554 | 0.925 |
| 237082_at    | DDEF1           | Development and differentiation enhancing factor 1                                               | 1.754 | 0.925 |
| 209216_at    | WDR45           | WD repeat domain 45                                                                              | 1.582 | 0.925 |
| 209273_s_at  | HBLD2           | HESB like domain containing 2                                                                    | 1.934 | 0.925 |
| 208612_at    | PDIA3           | protein disulfide isomerase family A, member 3                                                   | 2.349 | 0.925 |
| 223952_x_at  | DHRS9           | dehydrogenase/reductase (SDR family) member 9                                                    | 2.221 | 0.925 |
| 39854_r_at   | PNPLA2          | patatin-like phospholipase domain containing 2                                                   | 1.543 | 0.925 |
| 214583_at    | RSC1A1          | regulatory solute carrier protein, family 1, member 1                                            | 2.002 | 0.925 |
| 203805_s_at  | FANCA           | Fanconi anemia, complementation group A /// Fanconi anemia, complementation group A              | 1.719 | 0.925 |
| 223124_s_at  | C1orf128        | chromosome 1 open reading frame 128                                                              | 2.056 | 0.925 |
| 212003_at    | C1orf144        | chromosome 1 open reading frame 144                                                              | 1.580 | 0.925 |

|              |           |                                                                                         |       |       |
|--------------|-----------|-----------------------------------------------------------------------------------------|-------|-------|
| 212473_s_at  | MICAL2    | microtubule associated monooxygenase, calponin and LIM domain containing 2              | 1.613 | 0.925 |
| 240638_at    | PLXNC1    | Plexin C1                                                                               | 1.505 | 0.925 |
| 202869_at    | OAS1      | 2',5'-oligoadenylate synthetase 1, 40/46kDa                                             | 2.050 | 0.925 |
| 222043_at    | CLU       | clusterin                                                                               | 1.693 | 0.925 |
| 223924_at    | TTC25     | tetratricopeptide repeat domain 25                                                      | 1.911 | 0.925 |
| 236156_at    | LIPA      | lipase A, lysosomal acid, cholesterol esterase (Wolman disease)                         | 2.247 | 0.925 |
| 239012_at    | IBRDC2    | IBR domain containing 2                                                                 | 1.528 | 0.925 |
| 218400_at    | OAS3      | 2'-5'-oligoadenylate synthetase 3, 100kDa                                               | 1.997 | 0.925 |
| 237077_at    | ACPP      | Acid phosphatase, prostate                                                              | 1.753 | 0.925 |
| 213327_s_at  | USP12     | ubiquitin specific peptidase 12                                                         | 1.739 | 0.925 |
| 211781_x_at  | ---       | ---                                                                                     | 3.248 | 0.925 |
| 217274_x_at  | MYL4      | myosin, light chain 4, alkali; atrial, embryonic                                        | 2.005 | 0.925 |
| 243952_at    | psiTPTE22 | TPTE pseudogene                                                                         | 1.803 | 0.925 |
| 225775_at    | TSPAN33   | tetraspanin 33                                                                          | 1.570 | 0.925 |
| 203949_at    | MPO       | myeloperoxidase                                                                         | 2.429 | 0.925 |
| 221764_at    | C19orf22  | chromosome 19 open reading frame 22                                                     | 1.520 | 0.925 |
| 239206_at    | CR1L      | complement component (3b/4b) receptor 1-like                                            | 3.693 | 0.925 |
| 206647_at    | HBZ       | hemoglobin, zeta /// hemoglobin, zeta                                                   | 7.339 | 0.925 |
| 1565347_s_at | TFE3      | transcription factor binding to IGHM enhancer 3                                         | 1.864 | 0.925 |
| 227649_s_at  | SRGAP2    | SLIT-ROBO Rho GTPase activating protein 2                                               | 1.508 | 0.925 |
| 213617_s_at  | C18orf10  | chromosome 18 open reading frame 10                                                     | 1.762 | 0.925 |
| 211993_at    | WNK1      | WNK lysine deficient protein kinase 1 /// WNK lysine deficient protein kinase 1         | 1.909 | 0.925 |
| 205660_at    | OASL      | 2'-5'-oligoadenylate synthetase-like                                                    | 2.255 | 0.925 |
| 226637_at    | UBE2H     | Ubiquitin-conjugating enzyme E2H (UBC8 homolog, yeast)                                  | 2.017 | 0.925 |
| 209301_at    | CA2       | carbonic anhydrase II                                                                   | 1.775 | 0.925 |
| 205390_s_at  | ANK1      | ankyrin 1, erythrocytic /// ankyrin 1, erythrocytic                                     | 2.998 | 0.925 |
| 215498_s_at  | MAP2K3    | mitogen-activated protein kinase kinase 3 /// mitogen-activated protein kinase kinase 3 | 1.565 | 0.925 |
| 1554481_a_at | EPB41     | erythrocyte membrane protein band 4.1 (elliptocytosis 1, RH-linked)                     | 1.866 | 0.925 |
| 212155_at    | RNF187    | ring finger protein 187                                                                 | 1.539 | 0.925 |
| 234989_at    | TncRNA    | trophoblast-derived noncoding RNA                                                       | 1.524 | 0.925 |
| 215719_x_at  | FAS       | Fas (TNF receptor superfamily, member 6)                                                | 1.526 | 0.925 |
| 202242_at    | TSPAN7    | tetraspanin 7                                                                           | 1.667 | 0.925 |
| 218872_at    | TESC      | tescalcin                                                                               | 1.650 | 0.925 |
| 232035_at    | HIST1H4H  | histone cluster 1, H4h                                                                  | 1.781 | 0.925 |
| 208253_at    | SIGLEC8   | sialic acid binding Ig-like lectin 8                                                    | 2.293 | 0.925 |
| 243824_at    | LOC728649 | Hypothetical protein LOC728649                                                          | 1.557 | 0.925 |
| 219952_s_at  | MCOLN1    | mucolipin 1                                                                             | 2.009 | 0.925 |
| 233689_at    | TCF7L2    | Transcription factor 7-like 2 (T-cell specific, HMG-box)                                | 2.015 | 0.925 |
| 219684_at    | RTP4      | receptor (chemosensory) transporter protein 4                                           | 2.082 | 0.925 |
| 216956_s_at  | ITGA2B    | integrin, alpha 2b (platelet glycoprotein IIb of IIb/IIIa complex, antigen CD41)        | 2.318 | 0.925 |
| 208886_at    | H1F0      | H1 histone family, member 0                                                             | 1.652 | 0.925 |
| 205110_s_at  | FGF13     | fibroblast growth factor 13                                                             | 2.772 | 0.925 |
| 201039_s_at  | RAD23A    | RAD23 homolog A (S. cerevisiae)                                                         | 1.610 | 0.925 |

## Supplementary table 1

## Upregulated transcripts

|              |            |                                                                                                               |       |       |
|--------------|------------|---------------------------------------------------------------------------------------------------------------|-------|-------|
| 203725_at    | GADD45A    | growth arrest and DNA-damage-inducible, alpha                                                                 | 1.595 | 0.925 |
| 225202_at    | RHOBTB3    | Rho-related BTB domain containing 3                                                                           | 1.533 | 0.925 |
| 205128_x_at  | PTGS1      | prostaglandin-endoperoxide synthase 1 (prostaglandin G/H synthase and cyclooxygenase)                         | 1.691 | 0.925 |
| 204482_at    | CLDN5      | claudin 5 (transmembrane protein deleted in velocardiofacial syndrome)                                        | 1.512 | 0.925 |
| 223285_s_at  | ST6GALNAC4 | ST6 (alpha-N-acetyl-neuraminyl-2,3-beta-galactosyl-1,3)-N-acetylgalactosaminide alpha-2,6-sialyltransferase 4 | 1.771 | 0.925 |
| 231228_at    | BCL2L1     | BCL2-like 1                                                                                                   | 2.014 | 0.925 |
| 1565732_at   | P11        | 26 serine protease                                                                                            | 2.359 | 0.925 |
| 206077_at    | KEL        | Kell blood group, metallo-endopeptidase                                                                       | 2.545 | 0.925 |
| 243508_at    | NEB        | Nebulin                                                                                                       | 3.683 | 0.925 |
| 216252_x_at  | FAS        | Fas (TNF receptor superfamily, member 6)                                                                      | 1.594 | 0.925 |
| 227473_at    | ---        | Transcribed locus, strongly similar to XP_001174013.1 cortactin isoform 1 [Pan troglodytes]                   | 1.699 | 0.925 |
| 1556331_a_at | PDE4D      | Phosphodiesterase 4D, cAMP-specific (phosphodiesterase E3 dunce homolog, Drosophila)                          | 2.343 | 0.925 |
| 224009_x_at  | DHRS9      | dehydrogenase/reductase (SDR family) member 9                                                                 | 2.285 | 0.925 |
| 204800_s_at  | DHRS12     | dehydrogenase/reductase (SDR family) member 12                                                                | 1.621 | 0.925 |
| 230959_at    | LOC730453  | hypothetical protein LOC730453                                                                                | 2.122 | 0.925 |
| 232726_at    | MAML3      | Mastermind-like 3 (Drosophila)                                                                                | 1.540 | 0.925 |
| 1559835_at   | LOC728649  | Hypothetical protein LOC728649                                                                                | 1.689 | 0.925 |
| 206167_s_at  | ARHGAP6    | Rho GTPase activating protein 6                                                                               | 1.772 | 0.925 |
| 214157_at    | GNAS       | GNAS complex locus                                                                                            | 2.248 | 0.925 |
| 206359_at    | SOCS3      | suppressor of cytokine signaling 3                                                                            | 1.535 | 0.925 |
| 1561615_s_at | SLC8A1     | solute carrier family 8 (sodium/calcium exchanger), member 1                                                  | 2.078 | 0.925 |
| 1568620_at   | CSAD       | cysteine sulfinic acid decarboxylase                                                                          | 2.385 | 0.925 |
| 219594_at    | NINJ2      | ninjurin 2                                                                                                    | 1.532 | 0.925 |
| 224550_s_at  | MRVI1      | murine retrovirus integration site 1 homolog                                                                  | 3.514 | 0.925 |
| 204907_s_at  | BCL3       | B-cell CLL/lymphoma 3                                                                                         | 1.577 | 1.191 |
| 204627_s_at  | ITGB3      | integrin, beta 3 (platelet glycoprotein IIIa, antigen CD61)                                                   | 2.348 | 1.191 |
| 229635_at    | ---        | CDNA clone IMAGE:4800262                                                                                      | 2.718 | 1.191 |
| 227041_at    | ---        | CDNA FLJ31513 fis, clone NT2R11000127                                                                         | 1.664 | 1.191 |
| 204628_s_at  | ITGB3      | integrin, beta 3 (platelet glycoprotein IIIa, antigen CD61)                                                   | 1.984 | 1.191 |
| 203276_at    | LMNB1      | lamin B1                                                                                                      | 1.910 | 1.191 |
| 241869_at    | APOL6      | apolipoprotein L, 6                                                                                           | 1.986 | 1.191 |
| 227400_at    | NFIX       | nuclear factor I/X (CCAAT-binding transcription factor)                                                       | 2.339 | 1.191 |
| 203680_at    | PRKAR2B    | protein kinase, cAMP-dependent, regulatory, type II, beta                                                     | 1.621 | 1.191 |
| 207111_at    | EMR1       | egf-like module containing, mucin-like, hormone receptor-like 1                                               | 1.691 | 1.191 |
| 205048_s_at  | PSPH       | phosphoserine phosphatase                                                                                     | 2.952 | 1.191 |
| 225051_at    | EPB41      | erythrocyte membrane protein band 4.1 (elliptocytosis 1, RH-linked)                                           | 1.532 | 1.191 |
| 207389_at    | GP1BA      | glycoprotein Ib (platelet), alpha polypeptide                                                                 | 1.549 | 1.191 |

## Supplementary table 1

## Upregulated transcripts

|              |                            |                                                                                                                                                                                         |       |       |
|--------------|----------------------------|-----------------------------------------------------------------------------------------------------------------------------------------------------------------------------------------|-------|-------|
| 202193_at    | LIMK2                      | LIM domain kinase 2                                                                                                                                                                     | 1.540 | 1.191 |
| 221478_at    | BNIP3L                     | BCL2/adenovirus E1B 19kDa interacting protein 3-like<br>/// BCL2/adenovirus E1B 19kDa interacting protein 3-like                                                                        | 1.543 | 1.191 |
| 210430_x_at  | RHD                        | Rh blood group, D antigen                                                                                                                                                               | 1.802 | 1.191 |
| 201805_at    | PRKAG1                     | protein kinase, AMP-activated, gamma 1 non-catalytic subunit                                                                                                                            | 1.973 | 1.191 |
| 226018_at    | C7orf41                    | chromosome 7 open reading frame 41                                                                                                                                                      | 1.587 | 1.191 |
| 210215_at    | TFR2                       | transferrin receptor 2                                                                                                                                                                  | 2.032 | 1.191 |
| 220937_s_at  | ST6GALNAC4                 | ST6 (alpha-N-acetyl-neuraminy-2,3-beta-galactosyl-1,3)-N-acetylgalactosaminide alpha-2,6-sialyltransferase 4                                                                            | 1.670 | 1.191 |
| 55705_at     | C19orf22                   | chromosome 19 open reading frame 22                                                                                                                                                     | 1.510 | 1.191 |
| 224534_at    | KREMEN1                    | kringle containing transmembrane protein 1 /// kringle containing transmembrane protein 1                                                                                               | 2.064 | 1.191 |
| 219761_at    | CLEC1A                     | C-type lectin domain family 1, member A                                                                                                                                                 | 1.512 | 1.191 |
| 1559607_s_at | GBP6                       | Guanylate binding protein family, member 6                                                                                                                                              | 1.729 | 1.191 |
| 229856_s_at  | C1orf128                   | Chromosome 1 open reading frame 128                                                                                                                                                     | 1.691 | 1.191 |
| 222420_s_at  | UBE2H                      | ubiquitin-conjugating enzyme E2H (UBC8 homolog, yeast)                                                                                                                                  | 1.659 | 1.191 |
| 210797_s_at  | OASL                       | 2'-5'-oligoadenylate synthetase-like                                                                                                                                                    | 2.171 | 1.191 |
| 233880_at    | C17orf27                   | chromosome 17 open reading frame 27                                                                                                                                                     | 1.658 | 1.191 |
| 228617_at    | BIRC4BP                    | XIAP associated factor-1                                                                                                                                                                | 1.690 | 1.191 |
| 244464_at    | ---                        | ---                                                                                                                                                                                     | 1.677 | 1.191 |
| 242957_at    | VWCE                       | von Willebrand factor C and EGF domains                                                                                                                                                 | 1.753 | 1.191 |
| 242961_x_at  | DDX58                      | DEAD (Asp-Glu-Ala-Asp) box polypeptide 58                                                                                                                                               | 1.612 | 1.191 |
| 236254_at    | VPS13B                     | vacuolar protein sorting 13 homolog B (yeast)                                                                                                                                           | 1.520 | 1.191 |
| 241368_at    | LSDP5                      | lipid storage droplet protein 5                                                                                                                                                         | 1.504 | 1.191 |
| 1566698_at   | ---                        | MRNA; cDNA DKFZp586I2322 (from clone DKFZp586I2322)                                                                                                                                     | 1.655 | 1.191 |
| 206207_at    | CLC                        | Charcot-Leyden crystal protein /// Charcot-Leyden crystal protein                                                                                                                       | 1.846 | 1.191 |
| 243296_at    | PBEF1                      | Pre-B-cell colony enhancing factor 1                                                                                                                                                    | 1.547 | 1.191 |
| 222446_s_at  | BACE2                      | beta-site APP-cleaving enzyme 2                                                                                                                                                         | 1.567 | 1.191 |
| 219458_s_at  | NSUN3                      | NOL1/NOP2/Sun domain family, member 3                                                                                                                                                   | 1.687 | 1.191 |
| 239205_s_at  | CR1 /// CR1L /// LOC653907 | blood group) /// complement component (3b/4b) receptor 1 (Knops complement component (3b/4b) receptor 1-like /// similar to complement component (3b/4b) receptor 1 isoform F precursor | 1.723 | 1.191 |
| 223963_s_at  | IGF2BP2                    | insulin-like growth factor 2 mRNA binding protein 2                                                                                                                                     | 2.022 | 1.191 |
| 232472_at    | FNDC3B                     | Fibronectin type III domain containing 3B                                                                                                                                               | 1.501 | 1.191 |
| 236260_at    | ---                        | ---                                                                                                                                                                                     | 1.747 | 1.191 |
| 207038_at    | SLC16A6                    | solute carrier family 16, member 6 (monocarboxylic acid transporter 7)                                                                                                                  | 1.513 | 1.191 |
| 226657_at    | MGC33894                   | transcript expressed during hematopoiesis 2                                                                                                                                             | 1.572 | 1.191 |
| 205757_at    | ENTPD5                     | ectonucleoside triphosphate diphosphohydrolase 5                                                                                                                                        | 1.767 | 1.191 |
| 206676_at    | CEACAM8                    | carcinoembryonic antigen-related cell adhesion molecule 8                                                                                                                               | 2.403 | 1.191 |
| 216317_x_at  | RHCE                       | Rh blood group, CcEe antigens                                                                                                                                                           | 1.765 | 1.191 |
| 208451_s_at  | C4A /// C4B                | complement component 4A (Rodgers blood group) /// complement component 4B (Childo blood group)                                                                                          | 4.129 | 1.191 |

|             |                   |                                                                                         |       |       |
|-------------|-------------------|-----------------------------------------------------------------------------------------|-------|-------|
| 221881_s_at | ADD3 /// CLIC4    | adducin 3 (gamma) /// chloride intracellular channel 4                                  | 1.517 | 1.191 |
| 209212_s_at | KLF5              | Kruppel-like factor 5 (intestinal)                                                      | 1.689 | 1.191 |
| 216782_at   | KCNJ15            | Potassium inwardly-rectifying channel, subfamily J, member 15                           | 1.698 | 1.191 |
| 200930_s_at | VCL               | vinculin                                                                                | 1.563 | 1.191 |
| 209047_at   | AQP1              | aquaporin 1 (Colton blood group)                                                        | 2.875 | 1.191 |
| 204132_s_at | FOXO3A            | forkhead box O3A                                                                        | 1.583 | 1.191 |
| 206176_at   | BMP6              | bone morphogenetic protein 6                                                            | 1.798 | 1.191 |
| 215499_at   | MAP2K3            | mitogen-activated protein kinase kinase 3 /// mitogen-activated protein kinase kinase 3 | 1.511 | 1.191 |
| 235659_at   | ---               | Transcribed locus                                                                       | 1.520 | 1.191 |
| 201335_s_at | ARHGEF12          | Rho guanine nucleotide exchange factor (GEF) 12                                         | 1.558 | 1.191 |
| 236223_s_at | RIT1              | Ras-like without CAAX 1                                                                 | 1.754 | 1.191 |
| 216389_s_at | WDR23             | WD repeat domain 23                                                                     | 1.587 | 1.191 |
| 203149_at   | PVRL2             | poliovirus receptor-related 2 (herpesvirus entry mediator B)                            | 2.414 | 1.191 |
| 239227_at   | EXT1              | Exostososes (multiple) 1                                                                | 1.550 | 1.191 |
| 218417_s_at | FLJ20489          | hypothetical protein FLJ20489                                                           | 1.738 | 1.191 |
| 217878_s_at | CDC27             | cell division cycle 27 homolog (S. cerevisiae)                                          | 1.596 | 1.191 |
| 206655_s_at | GP1BB /// SEPT5   | glycoprotein Ib (platelet), beta polypeptide /// septin 5                               | 1.686 | 1.191 |
| 201886_at   | WDR23             | WD repeat domain 23                                                                     | 1.525 | 1.191 |
| 56748_at    | TRIM10            | tripartite motif-containing 10                                                          | 1.557 | 1.191 |
| 244889_at   | FUT4              | Fucosyltransferase 4 (alpha (1,3) fucosyltransferase, myeloid-specific)                 | 1.615 | 1.191 |
| 242106_at   | MAPK1             | Mitogen-activated protein kinase 1                                                      | 1.610 | 1.191 |
| 217518_at   | FER1L3            | fer-1-like 3, myoferlin (C. elegans)                                                    | 1.895 | 1.191 |
| 222866_s_at | C14orf58          | chromosome 14 open reading frame 58                                                     | 1.568 | 1.191 |
| 1554442_at  | BEST1             | bestrophin 1                                                                            | 1.661 | 1.191 |
| 232471_at   | MYO1E             | Myosin IE                                                                               | 1.574 | 1.191 |
| 209734_at   | NCKAP1L           | NCK-associated protein 1-like                                                           | 2.143 | 1.191 |
| 237904_at   | ADORA3            | Adenosine A3 receptor                                                                   | 1.782 | 1.191 |
| 210744_s_at | IL5RA             | interleukin 5 receptor, alpha                                                           | 1.889 | 1.191 |
| 206871_at   | ELA2              | elastase 2, neutrophil                                                                  | 2.280 | 1.191 |
| 218978_s_at | SLC25A37          | solute carrier family 25, member 37                                                     | 1.541 | 1.191 |
| 235417_at   | SPOCD1            | SPOC domain containing 1                                                                | 1.974 | 1.191 |
| 208180_s_at | HIST1H4H          | histone cluster 1, H4h                                                                  | 1.806 | 1.191 |
| 218660_at   | DYSF              | dysferlin, limb girdle muscular dystrophy 2B (autosomal recessive)                      | 1.568 | 1.191 |
| 202018_s_at | LTF /// LOC728320 | lactotransferrin /// similar to lactotransferrin                                        | 1.744 | 1.191 |
| 203414_at   | MMD               | monocyte to macrophage differentiation-associated                                       | 1.573 | 1.191 |
| 235370_at   | KREMEN1           | kringle containing transmembrane protein 1                                              | 1.745 | 1.191 |
| 215956_at   | RAB5A             | RAB5A, member RAS oncogene family                                                       | 1.502 | 1.191 |
| 1559585_at  | FLJ31033          | hypothetical protein FLJ31033                                                           | 1.859 | 1.191 |
| 209610_s_at | SLC1A4            | solute carrier family 1 (glutamate/neutral amino acid transporter), member 4            | 1.530 | 1.191 |
| 202448_s_at | ZYG11BL           | zyg-11 homolog B (C. elegans)-like                                                      | 2.209 | 1.191 |
| 225353_s_at | C1QC              | complement component 1, q subcomponent, C chain                                         | 1.531 | 1.191 |

|              |            |                                                                                                                             |       |       |
|--------------|------------|-----------------------------------------------------------------------------------------------------------------------------|-------|-------|
| 204507_s_at  | PPP3R1     | protein phosphatase 3 (formerly 2B), regulatory subunit B, 19kDa, alpha isoform (calcineurin B, type I)                     | 1.557 | 1.191 |
| 203021_at    | SLPI       | secretory leukocyte peptidase inhibitor                                                                                     | 2.068 | 1.191 |
| 200784_s_at  | LRP1       | low density lipoprotein-related protein 1 (alpha-2-macroglobulin receptor)                                                  | 1.509 | 1.191 |
| 236402_at    | ---        | CDNA FLJ42263 fis, clone TKIDN2014570                                                                                       | 1.835 | 1.191 |
| 236218_at    | PHOSPHO1   | phosphatase, orphan 1                                                                                                       | 1.526 | 1.191 |
| 214530_x_at  | EPB41      | erythrocyte membrane protein band 4.1 (elliptocytosis 1, RH-linked)                                                         | 1.793 | 1.191 |
| 1570165_at   | CHST11     | Carbohydrate (chondroitin 4) sulfotransferase 11                                                                            | 3.198 | 1.191 |
| 201280_s_at  | DAB2       | disabled homolog 2, mitogen-responsive phosphoprotein (Drosophila)                                                          | 1.507 | 1.191 |
| 1570402_at   | KLC3       | kinesin light chain 3                                                                                                       | 1.576 | 1.191 |
| 212739_s_at  | NME4       | non-metastatic cells 4, protein expressed in                                                                                | 1.652 | 1.191 |
| 225061_at    | DNAJA4     | DnaJ (Hsp40) homolog, subfamily A, member 4                                                                                 | 1.962 | 1.191 |
| 231997_at    | TBCEL      | tubulin folding cofactor E-like                                                                                             | 2.647 | 1.191 |
| 212973_at    | RPIA       | ribose 5-phosphate isomerase A (ribose 5-phosphate epimerase)                                                               | 1.633 | 1.191 |
| 202509_s_at  | TNFAIP2    | tumor necrosis factor, alpha-induced protein 2                                                                              | 1.619 | 1.191 |
| 201108_s_at  | THBS1      | thrombospondin 1                                                                                                            | 1.938 | 1.191 |
| 209164_s_at  | CYB561     | cytochrome b-561                                                                                                            | 1.652 | 1.191 |
| 203153_at    | IFIT1      | interferon-induced protein with tetratricopeptide repeats 1 /// interferon-induced protein with tetratricopeptide repeats 1 | 1.839 | 1.191 |
| 204227_s_at  | TK2        | thymidine kinase 2, mitochondrial                                                                                           | 1.591 | 1.191 |
| 207601_at    | SULT1B1    | sulfotransferase family, cytosolic, 1B, member 1                                                                            | 1.720 | 1.191 |
| 243010_at    | MSI2       | musashi homolog 2 (Drosophila)                                                                                              | 2.028 | 1.191 |
| 219451_at    | MSRB2      | methionine sulfoxide reductase B2                                                                                           | 1.505 | 1.191 |
| 205170_at    | STAT2      | signal transducer and activator of transcription 2, 113kDa                                                                  | 1.594 | 1.191 |
| 213621_s_at  | GUK1       | Guanylate kinase 1                                                                                                          | 1.519 | 1.191 |
| 230690_at    | TUBB1      | tubulin, beta 1                                                                                                             | 1.535 | 1.191 |
| 209911_x_at  | HIST1H2BD  | histone cluster 1, H2bd                                                                                                     | 1.547 | 1.191 |
| 243356_at    | ---        | ---                                                                                                                         | 1.558 | 1.191 |
| 210190_at    | STX11      | syntaxin 11                                                                                                                 | 1.578 | 1.191 |
| 210757_x_at  | DAB2       | disabled homolog 2, mitogen-responsive phosphoprotein (Drosophila)                                                          | 1.534 | 1.191 |
| 236592_at    | FLJ20273   | RNA-binding protein                                                                                                         | 1.641 | 1.191 |
| 238446_at    | GUSBP1     | glucuronidase, beta pseudogene 1                                                                                            | 2.302 | 1.191 |
| 1566549_at   | DHRXS      | Dehydrogenase/reductase (SDR family) X-linked                                                                               | 2.034 | 1.191 |
| 220496_at    | CLEC1B     | C-type lectin domain family 1, member B                                                                                     | 1.718 | 1.191 |
| 229617_x_at  | AP2A1      | adaptor-related protein complex 2, alpha 1 subunit                                                                          | 1.585 | 1.191 |
| 1565525_a_at | TCP11L2    | t-complex 11 (mouse)-like 2                                                                                                 | 1.922 | 1.191 |
| 205552_s_at  | OAS1       | 2',5'-oligoadenylate synthetase 1, 40/46kDa                                                                                 | 1.671 | 1.191 |
| 205020_s_at  | ARL4A      | ADP-ribosylation factor-like 4A                                                                                             | 1.565 | 1.191 |
| 209116_x_at  | HBB        | hemoglobin, beta /// hemoglobin, beta                                                                                       | 1.844 | 1.191 |
| 206390_x_at  | PF4        | platelet factor 4 (chemokine (C-X-C motif) ligand 4)                                                                        | 1.524 | 1.191 |
| 221551_x_at  | ST6GALNAC4 | ST6 (alpha-N-acetyl-neuraminyl-2,3-beta-galactosyl-1,3)-N-acetylgalactosaminide alpha-2,6-sialyltransferase 4               | 1.765 | 1.191 |

## Supplementary table 1

## Upregulated transcripts

|              |          |                                                                                                                        |       |       |
|--------------|----------|------------------------------------------------------------------------------------------------------------------------|-------|-------|
| 223609_at    | ROPN1L   | ropporin 1-like                                                                                                        | 1.556 | 1.191 |
| 233476_at    | ---      | CDNA FLJ20182 fis, clone COLF0190                                                                                      | 1.608 | 1.191 |
| 210579_s_at  | TRIM10   | tripartite motif-containing 10                                                                                         | 1.633 | 1.191 |
| 234072_at    | SEMA4A   | sema domain, immunoglobulin domain (Ig),<br>transmembrane domain (TM) and short cytoplasmic<br>domain, (semaphorin) 4A | 1.569 | 1.191 |
| 211909_x_at  | PTGER3   | prostaglandin E receptor 3 (subtype EP3) ///<br>prostaglandin E receptor 3 (subtype EP3)                               | 1.553 | 1.191 |
| 1555464_at   | IFIH1    | interferon induced with helicase C domain 1                                                                            | 1.660 | 1.191 |
| 1561937_x_at | MAPKAPK5 | Mitogen-activated protein kinase-activated protein<br>kinase 5                                                         | 2.782 | 1.191 |
| 202103_at    | BRD4     | bromodomain containing 4                                                                                               | 1.582 | 1.191 |
| 238105_x_at  | ---      | Transcribed locus                                                                                                      | 1.527 | 1.191 |
| 1569207_s_at | TCP11L2  | t-complex 11 (mouse)-like 2                                                                                            | 1.855 | 1.191 |
| 210001_s_at  | SOCS1    | suppressor of cytokine signaling 1                                                                                     | 1.846 | 1.191 |
| 242665_at    | FMNL2    | formin-like 2                                                                                                          | 1.526 | 1.191 |
| 239832_at    | FAM122A  | Family with sequence similarity 122A                                                                                   | 1.542 | 1.191 |
| 227347_x_at  | HES4     | hairy and enhancer of split 4 (Drosophila)                                                                             | 1.565 | 1.191 |
| 232225_at    | HDAC4    | Histone deacetylase 4                                                                                                  | 1.530 | 1.191 |
| 209526_s_at  | HDGFRP3  | hepatoma-derived growth factor, related protein 3                                                                      | 1.678 | 1.191 |
| 211003_x_at  | TGM2     | transglutaminase 2 (C polypeptide, protein-glutamine-<br>gamma-glutamyltransferase)                                    | 2.683 | 1.191 |
| 1556283_s_at | FGFR1OP2 | FGFR1 oncogene partner 2                                                                                               | 1.973 | 1.191 |
| 240765_at    | SPECC1   | Sperm antigen with calponin homology and coiled-coil<br>domains 1                                                      | 1.591 | 1.191 |
| 1555786_s_at | ---      | ---                                                                                                                    | 1.571 | 1.191 |
| 1555039_a_at | ABCC4    | ATP-binding cassette, sub-family C (CFTR/MRP),<br>member 4                                                             | 1.778 | 1.191 |
| 208975_s_at  | KPNB1    | karyopherin (importin) beta 1                                                                                          | 1.518 | 1.191 |
| 204069_at    | MEIS1    | Meis1, myeloid ecotropic viral integration site 1 homolog<br>(mouse)                                                   | 1.660 | 1.191 |
| 1569190_at   | SCLT1    | sodium channel and clathrin linker 1                                                                                   | 1.543 | 1.191 |
| 244523_at    | VIL2     | Villin 2 (ezrin)                                                                                                       | 1.643 | 1.191 |
| 208052_x_at  | CEACAM3  | carcinoembryonic antigen-related cell adhesion<br>molecule 3                                                           | 1.531 | 1.191 |
| 242234_at    | BIRC4BP  | XIAP associated factor-1                                                                                               | 2.060 | 1.191 |
| 204787_at    | VSIG4    | V-set and immunoglobulin domain containing 4                                                                           | 1.590 | 1.191 |
| 202074_s_at  | OPTN     | optineurin                                                                                                             | 1.561 | 1.191 |
| 232423_at    | ARSD     | arylsulfatase D                                                                                                        | 1.562 | 1.191 |
| 208677_s_at  | BSG      | basigin (Ok blood group)                                                                                               | 1.725 | 1.191 |
| 1563720_at   | GPR141   | G protein-coupled receptor 141                                                                                         | 1.911 | 1.191 |
| 1554600_s_at | LMNA     | lamin A/C                                                                                                              | 1.531 | 1.191 |
| 200844_s_at  | PRDX6    | peroxiredoxin 6                                                                                                        | 1.501 | 1.191 |
| 229060_at    | YPEL2    | yippee-like 2 (Drosophila)                                                                                             | 1.529 | 1.191 |
| 203588_s_at  | TFDP2    | transcription factor Dp-2 (E2F dimerization partner 2)                                                                 | 1.529 | 1.191 |
| 204392_at    | CAMK1    | calcium/calmodulin-dependent protein kinase I                                                                          | 1.504 | 1.191 |
| 1552701_a_at | COP1     | caspase-1 dominant-negative inhibitor pseudo-ICE                                                                       | 1.562 | 1.191 |
| 241824_at    | FOSL2    | FOS-like antigen 2                                                                                                     | 1.594 | 1.191 |
| 237340_at    | SLC26A8  | solute carrier family 26, member 8                                                                                     | 2.243 | 1.191 |
| 227015_at    | ASPHD2   | aspartate beta-hydroxylase domain containing 2                                                                         | 1.658 | 1.191 |
| 205837_s_at  | GYPA     | glycophorin A (MNS blood group)                                                                                        | 2.176 | 1.191 |

|              |           |                                                                                     |       |       |
|--------------|-----------|-------------------------------------------------------------------------------------|-------|-------|
| 1555116_s_at | SLC11A1   | solute carrier family 11 (proton-coupled divalent metal ion transporters), member 1 | 1.543 | 1.191 |
| 222528_s_at  | SLC25A37  | solute carrier family 25, member 37                                                 | 1.505 | 1.191 |
| 227615_at    | TFIP11    | Tuftelin interacting protein 11                                                     | 1.687 | 1.191 |
| 208782_at    | FSTL1     | folistatin-like 1                                                                   | 2.077 | 1.191 |
| 215240_at    | ITGB3     | integrin, beta 3 (platelet glycoprotein IIIa, antigen CD61)                         | 1.903 | 1.191 |
| 1558444_at   | LOC730943 | Similar to sorting nexin associated golgi protein 1                                 | 2.753 | 1.191 |
| 218384_at    | CARHSP1   | calcium regulated heat stable protein 1, 24kDa                                      | 1.527 | 1.191 |
| 227461_at    | STON2     | stonin 2                                                                            | 1.713 | 1.191 |
| 223237_x_at  | AP2A1     | adaptor-related protein complex 2, alpha 1 subunit                                  | 1.675 | 1.191 |
| 1564276_at   | LOC441108 | hypothetical gene supported by AK128882                                             | 1.645 | 1.191 |
| 217232_x_at  | HBB       | hemoglobin, beta                                                                    | 1.826 | 1.191 |
| 229309_at    | ADRB1     | adrenergic, beta-1-, receptor                                                       | 2.024 | 1.191 |
| 241881_at    | OR2W3     | olfactory receptor, family 2, subfamily W, member 3                                 | 2.729 | 1.191 |
| 62987_r_at   | CACNG4    | calcium channel, voltage-dependent, gamma subunit 4                                 | 1.506 | 1.191 |
| 37966_at     | PARVB     | parvin, beta                                                                        | 1.754 | 1.191 |
| 1570375_at   | PTPRN2    | Protein tyrosine phosphatase, receptor type, N polypeptide 2                        | 1.533 | 1.191 |
| 243507_s_at  | C20orf196 | chromosome 20 open reading frame 196                                                | 2.156 | 1.191 |
| 224823_at    | MYLK      | myosin, light chain kinase                                                          | 1.641 | 1.191 |
| 236963_at    | ---       | Transcribed locus                                                                   | 1.684 | 1.191 |
| 215248_at    | GRB10     | growth factor receptor-bound protein 10                                             | 1.516 | 1.191 |
| 217735_s_at  | EIF2AK1   | eukaryotic translation initiation factor 2-alpha kinase 1                           | 1.956 | 1.191 |
| 206049_at    | SELP      | selectin P (granule membrane protein 140kDa, antigen CD62)                          | 1.504 | 1.191 |
| 236224_at    | RIT1      | Ras-like without CAAX 1                                                             | 1.874 | 1.191 |
| 1559606_at   | GBP6      | Guanylate binding protein family, member 6                                          | 2.127 | 1.191 |
| 243032_at    | PIP3-E    | Phosphoinositide-binding protein PIP3-E                                             | 1.628 | 1.191 |
| 205442_at    | MFAP3L    | microfibrillar-associated protein 3-like                                            | 1.531 | 1.191 |
| 205508_at    | SCN1B     | sodium channel, voltage-gated, type I, beta                                         | 1.585 | 1.191 |
| 218952_at    | PCSK1N    | proprotein convertase subtilisin/kexin type 1 inhibitor                             | 2.290 | 1.191 |
| 1568249_at   | SNORA71B  | small nucleolar RNA, H/ACA box 71B                                                  | 1.551 | 1.191 |
| 202607_at    | NDST1     | N-deacetylase/N-sulfotransferase (heparan glucosaminy) 1                            | 1.630 | 1.191 |
| 230682_x_at  | ABCC3     | ATP-binding cassette, sub-family C (CFTR/MRP), member 3                             | 1.537 | 1.191 |
| 242906_at    | ---       | MRNA; cDNA DKFZp313B1017 (from clone DKFZp313B1017)                                 | 1.812 | 1.191 |
| 222904_s_at  | TMC5      | transmembrane channel-like 5                                                        | 2.411 | 1.191 |
| 215101_s_at  | CXCL5     | chemokine (C-X-C motif) ligand 5                                                    | 1.612 | 1.191 |
| 235916_at    | YPEL4     | yippee-like 4 (Drosophila)                                                          | 3.103 | 1.191 |
| 214770_at    | MSR1      | macrophage scavenger receptor 1                                                     | 1.701 | 1.191 |
| 204929_s_at  | VAMP5     | vesicle-associated membrane protein 5 (myobrevin)                                   | 1.717 | 1.191 |
| 210789_x_at  | CEACAM3   | carcinoembryonic antigen-related cell adhesion molecule 3                           | 1.518 | 1.191 |
| 202912_at    | ADM       | adrenomedullin                                                                      | 1.564 | 1.191 |
| 211018_at    | LSS       | lanosterol synthase (2,3-oxidosqualene-lanosterol cyclase)                          | 1.689 | 1.191 |

## Supplementary table 1

## Upregulated transcripts

|             |           |                                                                                                                     |       |       |
|-------------|-----------|---------------------------------------------------------------------------------------------------------------------|-------|-------|
| 235461_at   | KIAA1546  | KIAA1546                                                                                                            | 1.698 | 1.191 |
| 241621_at   | SMCHD1    | Structural maintenance of chromosomes flexible hinge domain containing 1                                            | 1.656 | 1.191 |
| 231732_at   | SMPD3     | sphingomyelin phosphodiesterase 3, neutral membrane (neutral sphingomyelinase II)                                   | 1.743 | 1.191 |
| 204131_s_at | FOXO3A    | forkhead box O3A                                                                                                    | 1.503 | 1.191 |
| 204629_at   | PARVB     | parvin, beta                                                                                                        | 1.514 | 1.191 |
| 1554469_at  | ZBTB44    | zinc finger and BTB domain containing 44                                                                            | 1.726 | 1.191 |
| 217654_at   | CFLAR     | CASP8 and FADD-like apoptosis regulator                                                                             | 1.510 | 1.191 |
| 233877_at   | GOLPH4    | Golgi phosphoprotein 4                                                                                              | 1.511 | 1.191 |
| 207233_s_at | MITF      | microphthalmia-associated transcription factor                                                                      | 1.584 | 1.191 |
| 225755_at   | KLHDC8B   | kelch domain containing 8B                                                                                          | 1.505 | 1.191 |
| 216671_x_at | MUC8      | mucin 8                                                                                                             | 2.215 | 1.191 |
| 240131_at   | ---       | Transcribed locus                                                                                                   | 1.947 | 1.191 |
| 1560007_at  | LOC645984 | hypothetical LOC645984                                                                                              | 1.665 | 1.191 |
| 224397_s_at | TMTC1     | transmembrane and tetratricopeptide repeat containing 1 /// transmembrane and tetratricopeptide repeat containing 1 | 1.544 | 1.191 |
| 217370_x_at | FUS       | fusion (involved in t(12;16) in malignant liposarcoma)                                                              | 1.581 | 1.191 |
| 216261_at   | ITGB3     | integrin, beta 3 (platelet glycoprotein IIIa, antigen CD61)                                                         | 1.852 | 1.191 |
| 223597_at   | ITLN1     | intelectin 1 (galactofuranose binding)                                                                              | 2.833 | 1.191 |
| 225286_at   | ARSD      | arylsulfatase D                                                                                                     | 1.501 | 1.191 |
| 231688_at   | ---       | Transcribed locus                                                                                                   | 1.937 | 1.191 |
| 205900_at   | KRT1      | keratin 1 (epidermolytic hyperkeratosis)                                                                            | 2.408 | 1.191 |
| 210672_s_at | C16orf35  | chromosome 16 open reading frame 35                                                                                 | 2.679 | 1.191 |
| 201250_s_at | SLC2A1    | solute carrier family 2 (facilitated glucose transporter), member 1                                                 | 1.822 | 1.191 |
| 202976_s_at | RHOBTB3   | Rho-related BTB domain containing 3                                                                                 | 1.555 | 1.191 |
| 210586_x_at | RHD       | Rh blood group, D antigen                                                                                           | 1.962 | 1.191 |
| 211696_x_at | HBB       | hemoglobin, beta /// hemoglobin, beta                                                                               | 1.731 | 1.191 |
| 201644_at   | TSTA3     | tissue specific transplantation antigen P35B                                                                        | 1.504 | 1.191 |
| 203559_s_at | ABP1      | amiloride binding protein 1 (amine oxidase (copper-containing))                                                     | 2.473 | 1.191 |
| 240948_at   | TLR4      | Toll-like receptor 4                                                                                                | 1.508 | 1.191 |
| 220336_s_at | GP6       | glycoprotein VI (platelet)                                                                                          | 1.606 | 1.191 |
| 238376_at   | DEXI      | Dexamethasone-induced transcript                                                                                    | 1.546 | 1.191 |
| 223754_at   | MGC13057  | hypothetical protein MGC13057                                                                                       | 1.771 | 1.191 |
| 205346_at   | ST3GAL2   | ST3 beta-galactoside alpha-2,3-sialyltransferase 2                                                                  | 1.578 | 1.191 |
| 230585_at   | ---       | Transcribed locus                                                                                                   | 1.843 | 1.191 |
| 214575_s_at | AZU1      | azurocidin 1 (cationic antimicrobial protein 37)                                                                    | 2.209 | 1.191 |
| 244519_at   | ASXL1     | additional sex combs like 1 (Drosophila)                                                                            | 1.529 | 1.191 |
| 205819_at   | MARCO     | macrophage receptor with collagenous structure /// macrophage receptor with collagenous structure                   | 2.106 | 1.191 |
| 222816_s_at | ZCCHC2    | zinc finger, CCHC domain containing 2                                                                               | 1.512 | 1.191 |
| 209457_at   | DUSP5     | dual specificity phosphatase 5                                                                                      | 1.600 | 1.191 |
| 227522_at   | CMBL      | carboxymethylenebutenolidase homolog (Pseudomonas)                                                                  | 1.597 | 1.191 |
| 243754_at   | ---       | Transcribed locus                                                                                                   | 1.599 | 1.191 |
| 233596_at   | UIMC1     | Ubiquitin interaction motif containing 1                                                                            | 1.556 | 1.191 |
| 203052_at   | C2        | complement component 2                                                                                              | 1.680 | 1.191 |

## Supplementary table 1

## Upregulated transcripts

|             |              |                                                                                                     |       |       |
|-------------|--------------|-----------------------------------------------------------------------------------------------------|-------|-------|
| 1570507_at  | CTNNB1       | catenin (cadherin-associated protein), beta 1, 88kDa                                                | 2.343 | 1.191 |
| 48106_at    | FLJ20489     | hypothetical protein FLJ20489                                                                       | 1.523 | 1.191 |
| 1557852_at  | PHC2         | Polyhomeotic homolog 2 (Drosophila)                                                                 | 1.507 | 1.191 |
| 211555_s_at | GUCY1B3      | guanylate cyclase 1, soluble, beta 3                                                                | 1.916 | 1.191 |
| 215886_x_at | USP12        | ubiquitin specific peptidase 12                                                                     | 1.710 | 1.191 |
| 228802_at   | RBPMS2       | RNA binding protein with multiple splicing 2                                                        | 2.131 | 1.191 |
| 231858_x_at | DKFZp761E198 | DKFZp761E198 protein                                                                                | 1.759 | 1.191 |
| 241620_at   | SMCHD1       | structural maintenance of chromosomes flexible hinge domain containing 1                            | 1.515 | 1.191 |
| 206110_at   | HIST1H3H     | histone cluster 1, H3h                                                                              | 1.758 | 1.191 |
| 240393_at   | AES          | Amino-terminal enhancer of split                                                                    | 1.556 | 1.191 |
| 202975_s_at | RHOBTB3      | Rho-related BTB domain containing 3                                                                 | 1.604 | 1.191 |
| 235744_at   | PPTC7        | PTC7 protein phosphatase homolog (S. cerevisiae)                                                    | 1.793 | 1.191 |
| 206632_s_at | APOBEC3B     | apolipoprotein B mRNA editing enzyme, catalytic polypeptide-like 3B                                 | 2.593 | 1.191 |
| 221529_s_at | PLVAP        | plasmalemma vesicle associated protein                                                              | 4.296 | 1.191 |
| 208601_s_at | TUBB1        | tubulin, beta 1 /// tubulin, beta 1                                                                 | 1.525 | 1.191 |
| 200923_at   | LGALS3BP     | lectin, galactoside-binding, soluble, 3 binding protein                                             | 1.613 | 1.191 |
| 214483_s_at | ARFIP1       | ADP-ribosylation factor interacting protein 1 (arfaptin 1)                                          | 2.570 | 1.191 |
| 236495_at   | PBEF1        | Pre-B-cell colony enhancing factor 1                                                                | 1.500 | 1.191 |
| 214639_s_at | HOXA1        | homeobox A1                                                                                         | 1.842 | 1.191 |
| 244875_at   | CXYorf2      | Chromosome X and Y open reading frame 2                                                             | 2.017 | 1.191 |
| 211573_x_at | TGM2         | transglutaminase 2 (C polypeptide, protein-glutamine-gamma-glutamyltransferase)                     | 2.086 | 1.191 |
| 215819_s_at | RHCE /// RHD | Rh blood group, CcEe antigens /// Rh blood group, D antigen                                         | 1.562 | 1.191 |
| 207329_at   | MMP8         | matrix metalloproteinase 8 (neutrophil collagenase)                                                 | 1.570 | 1.191 |
| 1569490_at  | FNDC3B       | Fibronectin type III domain containing 3B                                                           | 1.514 | 1.191 |
| 236422_at   | FLJ22662     | Hypothetical protein FLJ22662                                                                       | 1.503 | 1.191 |
| 225207_at   | PDK4         | pyruvate dehydrogenase kinase, isozyme 4                                                            | 1.513 | 1.191 |
| 231982_at   | LOC284422    | similar to HSPC323                                                                                  | 1.892 | 1.191 |
| 207550_at   | MPL          | myeloproliferative leukemia virus oncogene                                                          | 2.106 | 1.191 |
| 201551_s_at | LAMP1        | lysosomal-associated membrane protein 1                                                             | 3.920 | 1.191 |
| 224393_s_at | CECR6        | cat eye syndrome chromosome region, candidate 6 /// cat eye syndrome chromosome region, candidate 6 | 1.510 | 1.191 |
| 225418_at   | PVRL2        | poliovirus receptor-related 2 (herpesvirus entry mediator B)                                        | 3.117 | 1.191 |
| 212811_x_at | SLC1A4       | solute carrier family 1 (glutamate/neutral amino acid transporter), member 4                        | 1.619 | 1.191 |
| 243256_at   | MKNK1        | MAP kinase interacting serine/threonine kinase 1                                                    | 1.529 | 1.191 |
| 221102_s_at | TRPM6        | transient receptor potential cation channel, subfamily M, member 6                                  | 1.602 | 1.191 |
| 236013_at   | CACNA1E      | calcium channel, voltage-dependent, alpha 1E subunit                                                | 2.096 | 1.191 |
| 203691_at   | PI3          | peptidase inhibitor 3, skin-derived (SKALP) /// peptidase inhibitor 3, skin-derived (SKALP)         | 2.027 | 1.191 |
| 201801_s_at | SLC29A1      | solute carrier family 29 (nucleoside transporters), member 1                                        | 1.619 | 1.191 |

|              |                     |                                                                                                                                                                                                     |       |       |
|--------------|---------------------|-----------------------------------------------------------------------------------------------------------------------------------------------------------------------------------------------------|-------|-------|
| 220335_x_at  | FLJ21736            | esterase 31                                                                                                                                                                                         | 1.521 | 1.191 |
| 205960_at    | PDK4                | pyruvate dehydrogenase kinase, isozyme 4                                                                                                                                                            | 1.552 | 1.191 |
| 237156_at    | IQSEC1              | IQ motif and Sec7 domain 1                                                                                                                                                                          | 1.526 | 1.191 |
| 1560397_s_at | KLHL6               | kelch-like 6 (Drosophila)                                                                                                                                                                           | 1.537 | 1.191 |
| 211517_s_at  | IL5RA               | interleukin 5 receptor, alpha                                                                                                                                                                       | 1.989 | 1.191 |
| 236390_at    | C20orf94            | chromosome 20 open reading frame 94                                                                                                                                                                 | 1.534 | 1.191 |
| 211207_s_at  | ACSL6               | acyl-CoA synthetase long-chain family member 6                                                                                                                                                      | 1.742 | 1.191 |
| 234068_s_at  | AP2A1               | adaptor-related protein complex 2, alpha 1 subunit                                                                                                                                                  | 1.578 | 1.191 |
| 1565484_x_at | EGFR                | epidermal growth factor receptor (erythroblastic leukemia viral (v-erb-b) oncogene homolog, avian)                                                                                                  | 1.753 | 1.191 |
| 227717_at    | FLJ41603            | FLJ41603 protein                                                                                                                                                                                    | 1.667 | 1.191 |
| 219386_s_at  | SLAMF8              | SLAM family member 8                                                                                                                                                                                | 1.735 | 1.191 |
| 1561880_a_at | SIGLECP16           | sialic acid binding Ig-like lectin, pseudogene 16                                                                                                                                                   | 1.563 | 1.191 |
| 1554918_a_at | ABCC4               | ATP-binding cassette, sub-family C (CFTR/MRP), member 4                                                                                                                                             | 2.058 | 1.191 |
| 211657_at    | CEACAM6             | carcinoembryonic antigen-related cell adhesion molecule 6 (non-specific cross reacting antigen) /// carcinoembryonic antigen-related cell adhesion molecule 6 (non-specific cross reacting antigen) | 2.637 | 1.191 |
| 227683_x_at  | ---                 | ---                                                                                                                                                                                                 | 1.673 | 1.191 |
| 205692_s_at  | CD38                | CD38 molecule                                                                                                                                                                                       | 1.709 | 1.191 |
| 212912_at    | RPS6KA2             | ribosomal protein S6 kinase, 90kDa, polypeptide 2                                                                                                                                                   | 1.586 | 1.191 |
| 222139_at    | KIAA1466            | KIAA1466 gene                                                                                                                                                                                       | 1.739 | 1.191 |
| 1562955_at   | WDFY1               | WD repeat and FYVE domain containing 1                                                                                                                                                              | 1.703 | 1.191 |
| 205166_at    | CAPN5               | calpain 5                                                                                                                                                                                           | 1.576 | 1.191 |
| 238405_at    | GAB2                | GRB2-associated binding protein 2                                                                                                                                                                   | 1.624 | 1.191 |
| 222154_s_at  | DNAPTP6             | DNA polymerase-transactivated protein 6                                                                                                                                                             | 1.758 | 1.191 |
| 242582_at    | ---                 | Transcribed locus                                                                                                                                                                                   | 1.524 | 1.191 |
| 210173_at    | PTPRJ               | protein tyrosine phosphatase, receptor type, J                                                                                                                                                      | 1.580 | 1.191 |
| 202729_s_at  | LTBP1               | latent transforming growth factor beta binding protein 1                                                                                                                                            | 1.563 | 1.191 |
| 228216_at    | ---                 | Transcribed locus                                                                                                                                                                                   | 2.298 | 1.191 |
| 1558322_a_at | PAQR9               | progesterin and adipoQ receptor family member IX                                                                                                                                                    | 1.548 | 1.191 |
| 1562777_at   | ---                 | CDNA FLJ40180 fis, clone TEST12018035                                                                                                                                                               | 1.529 | 1.191 |
| 211806_s_at  | KCNJ15              | potassium inwardly-rectifying channel, subfamily J, member 15                                                                                                                                       | 1.533 | 1.191 |
| 231078_at    | ---                 | ---                                                                                                                                                                                                 | 1.568 | 1.191 |
| 209163_at    | CYB561              | cytochrome b-561                                                                                                                                                                                    | 1.509 | 1.191 |
| 231381_at    | HESRG               | embryonic stem cell related protein                                                                                                                                                                 | 2.081 | 1.191 |
| 228737_at    | C20orf100           | chromosome 20 open reading frame 100                                                                                                                                                                | 1.662 | 1.191 |
| 225024_at    | C20orf77            | chromosome 20 open reading frame 77                                                                                                                                                                 | 1.687 | 1.191 |
| 1567101_at   | DACH1               | Dachshund homolog 1 (Drosophila)                                                                                                                                                                    | 1.560 | 1.191 |
| 202290_at    | PDAP1               | PDGFA associated protein 1                                                                                                                                                                          | 1.564 | 1.191 |
| 203757_s_at  | CEACAM6             | carcinoembryonic antigen-related cell adhesion molecule 6 (non-specific cross reacting antigen)                                                                                                     | 1.930 | 1.191 |
| 239872_at    | OSBP2               | Oxysterol binding protein 2                                                                                                                                                                         | 4.384 | 1.191 |
| 223635_s_at  | SSBP3 ///<br>IL17RB | single stranded DNA binding protein 3 /// interleukin 17 receptor B                                                                                                                                 | 1.513 | 1.191 |
| 221484_at    | B4GALT5             | UDP-Gal:betaGlcNAc beta 1,4- galactosyltransferase, polypeptide 5                                                                                                                                   | 1.651 | 1.191 |
| 239464_at    | ---                 | ---                                                                                                                                                                                                 | 1.690 | 1.191 |

## Supplementary table 1

## Upregulated transcripts

|              |           |                                                                                |       |       |
|--------------|-----------|--------------------------------------------------------------------------------|-------|-------|
| 226686_at    | ZCD2      | zinc finger, CDGSH-type domain 2                                               | 1.588 | 1.191 |
| 205569_at    | LAMP3     | lysosomal-associated membrane protein 3                                        | 1.664 | 1.191 |
| 202199_s_at  | SRPK1     | SFRS protein kinase 1                                                          | 1.592 | 1.191 |
| 41469_at     | PI3       | peptidase inhibitor 3, skin-derived (SKALP)                                    | 2.007 | 1.191 |
| 215236_s_at  | PICALM    | phosphatidylinositol binding clathrin assembly protein                         | 1.850 | 1.191 |
| 242842_at    | ---       | Transcribed locus                                                              | 1.631 | 1.191 |
| 206877_at    | MXD1      | MAX dimerization protein 1                                                     | 2.477 | 1.191 |
| 204625_s_at  | ITGB3     | integrin, beta 3 (platelet glycoprotein IIIa, antigen CD61)                    | 2.267 | 1.191 |
| 219580_s_at  | TMC5      | transmembrane channel-like 5                                                   | 3.794 | 1.191 |
| 240055_at    | NANOG     | Nanog homeobox                                                                 | 1.848 | 1.191 |
| 214453_s_at  | IFI44     | interferon-induced protein 44                                                  | 1.694 | 1.191 |
| 240389_at    | TRPM6     | Transient receptor potential cation channel, subfamily M, member 6             | 1.538 | 1.191 |
| 226599_at    | KIAA1727  | KIAA1727 protein                                                               | 1.734 | 1.191 |
| 212570_at    | ENDOD1    | endonuclease domain containing 1                                               | 1.648 | 1.191 |
| 212183_at    | NUDT4     | nudix (nucleoside diphosphate linked moiety X)-type motif 4                    | 1.519 | 1.191 |
| 1557455_s_at | MOSPD1    | motile sperm domain containing 1                                               | 1.501 | 1.191 |
| 224098_at    | ---       | ---                                                                            | 1.640 | 1.191 |
| 235059_at    | RAB12     | RAB12, member RAS oncogene family                                              | 6.726 | 1.191 |
| 212418_at    | ELF1      | E74-like factor 1 (ets domain transcription factor)                            | 1.559 | 1.191 |
| 1559028_at   | C21orf15  | chromosome 21 open reading frame 15                                            | 2.070 | 1.191 |
| 238478_at    | BNC2      | basonuclin 2                                                                   | 1.663 | 1.191 |
| 214502_at    | HIST1H2BJ | histone cluster 1, H2bj                                                        | 1.555 | 1.191 |
| 210139_s_at  | PMP22     | peripheral myelin protein 22                                                   | 1.738 | 1.191 |
| 202767_at    | ACP2      | acid phosphatase 2, lysosomal                                                  | 1.510 | 1.191 |
| 206851_at    | RNASE3    | ribonuclease, RNase A family, 3 (eosinophil cationic protein)                  | 3.599 | 1.191 |
| 213258_at    | TFPI      | tissue factor pathway inhibitor (lipoprotein-associated coagulation inhibitor) | 1.545 | 1.191 |
| 215350_at    | SYNE1     | spectrin repeat containing, nuclear envelope 1                                 | 1.666 | 1.191 |
| 207766_at    | CDKL1     | cyclin-dependent kinase-like 1 (CDC2-related kinase)                           | 1.504 | 1.191 |
| 223767_at    | GPR84     | G protein-coupled receptor 84                                                  | 1.504 | 1.191 |
| 214059_at    | IFI44     | Interferon-induced protein 44                                                  | 1.953 | 1.191 |
| 222730_s_at  | ZDHHC2    | zinc finger, DHHC-type containing 2                                            | 1.586 | 1.191 |
| 237071_at    | ---       | Transcribed locus                                                              | 1.654 | 1.191 |
| 208459_s_at  | XPO7      | exportin 7                                                                     | 1.529 | 1.191 |
| 209785_s_at  | PLA2G4C   | phospholipase A2, group IVC (cytosolic, calcium-independent)                   | 1.561 | 1.191 |
| 1566964_at   | ---       | ---                                                                            | 2.203 | 1.191 |
| 233024_at    | RAB18     | RAB18, member RAS oncogene family                                              | 1.572 | 1.191 |
| 209691_s_at  | DOK4      | docking protein 4                                                              | 1.504 | 1.191 |
| 1568377_x_at | DEFB124   | defensin, beta 124                                                             | 1.661 | 1.191 |
| 214657_s_at  | TncRNA    | Trophoblast-derived noncoding RNA                                              | 3.259 | 1.191 |
| 236094_at    | TCF7L2    | Transcription factor 7-like 2 (T-cell specific, HMG-box)                       | 1.791 | 1.191 |
| 213524_s_at  | G0S2      | G0/G1switch 2                                                                  | 1.837 | 1.191 |
| 240671_at    | GYPC      | Glycophorin C (Gerbich blood group)                                            | 1.577 | 1.191 |

## Supplementary table 1

## Upregulated transcripts

|              |                                                                                                       |                                                                                                                                                                                                                                                                |       |       |
|--------------|-------------------------------------------------------------------------------------------------------|----------------------------------------------------------------------------------------------------------------------------------------------------------------------------------------------------------------------------------------------------------------|-------|-------|
| 206361_at    | GPR44                                                                                                 | G protein-coupled receptor 44                                                                                                                                                                                                                                  | 1.609 | 1.191 |
| 205471_s_at  | DACH1                                                                                                 | dachshund homolog 1 (Drosophila)                                                                                                                                                                                                                               | 1.621 | 1.191 |
| 230720_at    | RNF182                                                                                                | ring finger protein 182                                                                                                                                                                                                                                        | 5.124 | 1.191 |
| 216591_s_at  | SDHC ///<br>LOC642502                                                                                 | succinate dehydrogenase complex, subunit C, integral membrane protein, 15kDa /// similar to succinate dehydrogenase complex, subunit C isoform 3 precursor                                                                                                     | 1.732 | 2.863 |
| 209369_at    | ANXA3                                                                                                 | annexin A3                                                                                                                                                                                                                                                     | 1.850 | 2.863 |
| 205268_s_at  | ADD2                                                                                                  | adducin 2 (beta)                                                                                                                                                                                                                                               | 1.963 | 2.863 |
| 210506_at    | FUT7                                                                                                  | fucosyltransferase 7 (alpha (1,3) fucosyltransferase)                                                                                                                                                                                                          | 1.773 | 2.863 |
| 1557034_s_at | FAM19A3 ///<br>FAM39DP ///<br>FAM39B ///<br>FLJ00038 ///<br>CXYorf1 ///<br>LOC653635 ///<br>LOC727741 | family with sequence similarity 19 (chemokine (C-C motif)-like), member A3 /// family with sequence similarity 39, member D pseudogene /// family with sequence similarity 39, member B /// CXYorf1-related protein /// chromosomes X and Y open reading frame | 2.780 | 2.863 |
| 206768_at    | RPL3L                                                                                                 | ribosomal protein L3-like                                                                                                                                                                                                                                      | 1.662 | 2.863 |
| 204415_at    | IFI6                                                                                                  | interferon, alpha-inducible protein 6                                                                                                                                                                                                                          | 1.832 | 2.863 |
| 201329_s_at  | ETS2                                                                                                  | v-ets erythroblastosis virus E26 oncogene homolog 2 (avian)                                                                                                                                                                                                    | 1.672 | 2.863 |
| 228835_at    | ---                                                                                                   | CDNA FLJ33090 fis, clone TRACH2000559                                                                                                                                                                                                                          | 2.100 | 2.863 |
| 215990_s_at  | BCL6                                                                                                  | B-cell CLL/lymphoma 6 (zinc finger protein 51)                                                                                                                                                                                                                 | 1.884 | 2.863 |
| 230425_at    | EPHB1                                                                                                 | EPH receptor B1                                                                                                                                                                                                                                                | 1.514 | 2.863 |
| 212624_s_at  | CHN1                                                                                                  | chimerin (chimaerin) 1                                                                                                                                                                                                                                         | 1.544 | 2.863 |
| 203643_at    | ERF                                                                                                   | Ets2 repressor factor                                                                                                                                                                                                                                          | 1.644 | 2.863 |
| 241640_at    | ---                                                                                                   | ---                                                                                                                                                                                                                                                            | 1.793 | 2.863 |
| 209773_s_at  | RRM2                                                                                                  | ribonucleotide reductase M2 polypeptide                                                                                                                                                                                                                        | 2.066 | 2.863 |
| 243611_at    | MICALCL                                                                                               | MICAL C-terminal like                                                                                                                                                                                                                                          | 1.580 | 2.863 |
| 37117_at     | ARHGAP8 ///<br>LOC553158                                                                              | Rho GTPase activating protein 8 /// PRR5-ARHGAP8 fusion                                                                                                                                                                                                        | 1.610 | 2.863 |
| 206937_at    | SPTA1                                                                                                 | spectrin, alpha, erythrocytic 1 (elliptocytosis 2)                                                                                                                                                                                                             | 2.172 | 2.863 |
| 209372_x_at  | TUBB2A ///<br>TUBB2B                                                                                  | tubulin, beta 2A /// tubulin, beta 2B                                                                                                                                                                                                                          | 1.634 | 2.863 |
| 232079_s_at  | PVRL2                                                                                                 | poliovirus receptor-related 2 (herpesvirus entry mediator B)                                                                                                                                                                                                   | 2.647 | 2.863 |
| 1553920_at   | C9orf84                                                                                               | chromosome 9 open reading frame 84                                                                                                                                                                                                                             | 1.556 | 2.863 |
| 1554835_a_at | B3GNT5                                                                                                | UDP-GlcNAc:betaGal beta-1,3-N-acetylglucosaminyltransferase 5                                                                                                                                                                                                  | 1.644 | 2.863 |
| 1569617_at   | OSBP2                                                                                                 | Oxysterol binding protein 2                                                                                                                                                                                                                                    | 2.025 | 2.863 |
| 215832_x_at  | PICALM                                                                                                | phosphatidylinositol binding clathrin assembly protein                                                                                                                                                                                                         | 1.643 | 2.863 |
| 209735_at    | ABCG2                                                                                                 | ATP-binding cassette, sub-family G (WHITE), member 2                                                                                                                                                                                                           | 3.268 | 2.863 |
| 234199_at    | SLC24A3                                                                                               | Solute carrier family 24 (sodium/potassium/calcium exchanger), member 3                                                                                                                                                                                        | 1.602 | 2.863 |
| 228568_at    | Gcom1                                                                                                 | GRINL1A combined protein                                                                                                                                                                                                                                       | 1.618 | 2.863 |
| 230958_s_at  | ---                                                                                                   | Transcribed locus                                                                                                                                                                                                                                              | 1.646 | 2.863 |
| 224412_s_at  | TRPM6                                                                                                 | transient receptor potential cation channel, subfamily M, member 6 /// transient receptor potential cation channel, subfamily M, member 6                                                                                                                      | 1.738 | 2.863 |

|              |               |                                                                                                                 |       |       |
|--------------|---------------|-----------------------------------------------------------------------------------------------------------------|-------|-------|
| 213537_at    | HLA-DPA1      | major histocompatibility complex, class II, DP alpha 1                                                          | 1.736 | 2.863 |
| 1562031_at   | JAK2          | Janus kinase 2 (a protein tyrosine kinase)                                                                      | 1.562 | 2.863 |
| 210549_s_at  | CCL23         | chemokine (C-C motif) ligand 23                                                                                 | 1.971 | 2.863 |
| 230574_at    | SPIRE2        | Spire homolog 2 (Drosophila)                                                                                    | 1.594 | 2.863 |
| 232078_at    | PVRL2         | poliovirus receptor-related 2 (herpesvirus entry mediator B)                                                    | 2.913 | 2.863 |
| 1552582_at   | ABCC13        | ATP-binding cassette, sub-family C (CFTR/MRP), member 13                                                        | 2.069 | 2.863 |
| 207091_at    | P2RX7         | purinergic receptor P2X, ligand-gated ion channel, 7                                                            | 1.513 | 2.863 |
| 226173_at    | OATL1         | ornithine aminotransferase-like 1                                                                               | 1.540 | 2.863 |
| 1559117_at   | ---           | CDNA FLJ34664 fis, clone LIVER2000592                                                                           | 2.257 | 2.863 |
| 244144_at    | SYNE1         | spectrin repeat containing, nuclear envelope 1                                                                  | 1.598 | 2.863 |
| 205336_at    | PVALB         | parvalbumin                                                                                                     | 1.606 | 2.863 |
| 235818_at    | VSTM1         | V-set and transmembrane domain containing 1                                                                     | 1.573 | 2.863 |
| 216627_s_at  | B4GALT1       | UDP-Gal:betaGlcNAc beta 1,4- galactosyltransferase, polypeptide 1                                               | 1.989 | 2.863 |
|              | LOC340089 /// |                                                                                                                 |       |       |
|              | LOC441081 /// |                                                                                                                 |       |       |
|              | LOC643367 /// |                                                                                                                 |       |       |
|              | LOC728452 /// | similar to nuclear pore membrane protein 121 ///                                                                |       |       |
|              | LOC728488 /// | similar to nuclear pore membrane protein 121 ///                                                                |       |       |
| 1558011_at   | LOC728499 /// | containing SMA4; hypothetical protein LOC153561 ///                                                             | 1.557 | 2.863 |
|              | LOC728506 /// | similar to nuclear pore membrane protein 121 ///                                                                |       |       |
|              | LOC728526 /// | similar to Nuclear envelope pore membrane protein                                                               |       |       |
|              | LOC728540 /// |                                                                                                                 |       |       |
|              | LOC728575 /// |                                                                                                                 |       |       |
|              | LOC730392     |                                                                                                                 |       |       |
| 39729_at     | PRDX2         | peroxiredoxin 2                                                                                                 | 1.505 | 2.863 |
| 1557446_x_at | TREML3        | triggering receptor expressed on myeloid cells-like 3                                                           | 1.514 | 2.863 |
| 224399_at    | PDCD1LG2      | programmed cell death 1 ligand 2 /// programmed cell death 1 ligand 2                                           | 1.524 | 2.863 |
| 235221_at    | CBLN3         | cerebellin 3 precursor                                                                                          | 1.506 | 2.863 |
| 233036_at    | BNC2          | Basonuclin 2                                                                                                    | 2.297 | 2.863 |
| 204141_at    | TUBB2A        | tubulin, beta 2A                                                                                                | 1.957 | 2.863 |
| 207993_s_at  | CHP           | calcium binding protein P22                                                                                     | 1.561 | 2.863 |
| 223349_s_at  | BOK           | BCL2-related ovarian killer                                                                                     | 1.687 | 2.863 |
| 212998_x_at  | HLA-DQB1      | major histocompatibility complex, class II, DQ beta 1 /// major histocompatibility complex, class II, DQ beta 1 | 1.527 | 2.863 |
| 238309_x_at  | LOC441119     | Hypothetical LOC441119                                                                                          | 1.528 | 2.863 |
| 203948_s_at  | MPO           | myeloperoxidase                                                                                                 | 1.717 | 2.863 |
| 204682_at    | LTBP2         | latent transforming growth factor beta binding protein 2                                                        | 2.006 | 2.863 |
| 239249_at    | BCL6          | B-cell CLL/lymphoma 6 (zinc finger protein 51)                                                                  | 2.445 | 2.863 |
| 230315_at    | KLF3          | Kruppel-like factor 3 (basic)                                                                                   | 1.818 | 2.863 |
| 237056_at    | INSC          | inscuteable homolog (Drosophila)                                                                                | 1.699 | 2.863 |
| 238170_at    | CEP63         | Centrosomal protein 63kDa                                                                                       | 1.817 | 2.863 |
| 203961_at    | NEBL          | nebulin                                                                                                         | 2.314 | 2.863 |
| 235456_at    | ---           | CDNA clone IMAGE:4819084                                                                                        | 1.745 | 2.863 |
| 203913_s_at  | HPGD          | hydroxyprostaglandin dehydrogenase 15-(NAD)                                                                     | 1.556 | 2.863 |

## Supplementary table 1

## Upregulated transcripts

|             |               |                                                                                                                    |       |       |
|-------------|---------------|--------------------------------------------------------------------------------------------------------------------|-------|-------|
| 226806_s_at | ---           | ---                                                                                                                | 1.659 | 2.863 |
| 228910_at   | ---           | Transcribed locus                                                                                                  | 2.168 | 2.863 |
| 209728_at   | HLA-DRB4      | major histocompatibility complex, class II, DR beta 4 ///<br>major histocompatibility complex, class II, DR beta 4 | 2.485 | 2.863 |
| 204638_at   | ACP5          | acid phosphatase 5, tartrate resistant                                                                             | 1.775 | 2.863 |
| 226485_at   | ---           | CDNA FLJ37658 fis, clone BRHIP2010593                                                                              | 1.624 | 2.863 |
| 235250_at   | FLCN          | folliculin                                                                                                         | 2.966 | 2.863 |
| 231426_at   | C9orf71       | Chromosome 9 open reading frame 71                                                                                 | 1.561 | 2.863 |
| 225762_x_at | LOC284801     | hypothetical protein LOC284801                                                                                     | 1.600 | 2.863 |
| 220058_at   | C17orf39      | chromosome 17 open reading frame 39                                                                                | 1.549 | 2.863 |
| 220785_at   | UTS2          | urotensin 2                                                                                                        | 1.565 | 2.863 |
| 208476_s_at | FRMD4A        | FERM domain containing 4A                                                                                          | 3.038 | 2.863 |
| 205483_s_at | ISG15         | ISG15 ubiquitin-like modifier                                                                                      | 1.726 | 2.863 |
| 230422_at   | FPRL2         | formyl peptide receptor-like 2                                                                                     | 1.689 | 2.863 |
| 1556842_at  | LOC286087     | hypothetical protein LOC286087                                                                                     | 1.802 | 2.863 |
| 232232_s_at | SLC22A16      | solute carrier family 22 (organic cation transporter),<br>member 16                                                | 1.789 | 2.863 |
| 219607_s_at | MS4A4A        | membrane-spanning 4-domains, subfamily A, member 4                                                                 | 1.507 | 2.863 |
| 201222_s_at | RAD23B        | RAD23 homolog B (S. cerevisiae)                                                                                    | 1.503 | 2.863 |
| 213789_at   | ---           | ---                                                                                                                | 1.618 | 2.863 |
| 203890_s_at | DAPK3         | death-associated protein kinase 3                                                                                  | 1.771 | 2.863 |
| 240358_at   | DENND3        | DENN/MADD domain containing 3                                                                                      | 1.624 | 2.863 |
| 230354_at   | ---           | Transcribed locus                                                                                                  | 1.511 | 2.863 |
| 219271_at   | GALNT14       | UDP-N-acetyl-alpha-D-galactosamine:polypeptide N-<br>acetylgalactosaminyltransferase 14 (GalNAc-T14)               | 1.502 | 2.863 |
| 204720_s_at | DNAJC6        | DnaJ (Hsp40) homolog, subfamily C, member 6                                                                        | 1.578 | 2.863 |
| 209823_x_at | HLA-DQB1      | major histocompatibility complex, class II, DQ beta 1                                                              | 1.536 | 2.863 |
| 212482_at   | RMND5A        | required for meiotic nuclear division 5 homolog A (S.<br>cerevisiae)                                               | 1.500 | 2.863 |
| 207328_at   | ALOX15        | arachidonate 15-lipoxygenase                                                                                       | 1.689 | 2.863 |
| 202856_s_at | SLC16A3       | solute carrier family 16, member 3 (monocarboxylic acid<br>transporter 4)                                          | 1.596 | 2.863 |
| 201109_s_at | THBS1         | thrombospondin 1                                                                                                   | 1.527 | 2.863 |
| 202609_at   | EPS8          | epidermal growth factor receptor pathway substrate 8                                                               | 1.616 | 2.863 |
| 233587_s_at | SIPA1L2       | signal-induced proliferation-associated 1 like 2                                                                   | 1.706 | 2.863 |
| 1569955_at  | ---           | Homo sapiens, clone IMAGE:4097490, mRNA                                                                            | 1.513 | 2.863 |
| 1558504_at  | FLJ14186      | Hypothetical gene supported by AK024248; AL137733                                                                  | 1.507 | 2.863 |
| 220231_at   | C7orf16       | chromosome 7 open reading frame 16                                                                                 | 1.579 | 2.863 |
| 205591_at   | OLFM1         | olfactomedin 1                                                                                                     | 1.727 | 2.863 |
| 209616_s_at | CES1          | carboxylesterase 1 (monocyte/macrophage serine<br>esterase 1)                                                      | 1.723 | 2.863 |
| 230092_at   | ---           | ---                                                                                                                | 1.613 | 2.863 |
| 218733_at   | MSL2L1        | male-specific lethal 2-like 1 (Drosophila)                                                                         | 1.557 | 2.863 |
| 213515_x_at | HBG1 /// HBG2 | hemoglobin, gamma A /// hemoglobin, gamma A ///<br>hemoglobin, gamma G /// hemoglobin, gamma G                     | 1.554 | 2.863 |

## Supplementary table 1

## Upregulated transcripts

|             |                   |                                                                                                |       |       |
|-------------|-------------------|------------------------------------------------------------------------------------------------|-------|-------|
| 204848_x_at | HBG1 /// HBG2     | hemoglobin, gamma A /// hemoglobin, gamma A ///<br>hemoglobin, gamma G /// hemoglobin, gamma G | 1.531 | 2.863 |
| 238320_at   | TncRNA            | trophoblast-derived noncoding RNA                                                              | 1.516 | 2.863 |
| 220784_s_at | UTS2              | urotensin 2                                                                                    | 4.125 | 2.863 |
| 225056_at   | SIPA1L2           | signal-induced proliferation-associated 1 like 2                                               | 1.505 | 2.863 |
| 224568_x_at | MALAT1            | metastasis associated lung adenocarcinoma transcript 1<br>(non-coding RNA)                     | 2.628 | 2.863 |
| 243349_at   | KIAA1324          | KIAA1324                                                                                       | 2.132 | 2.863 |
| 231886_at   | DKFZP434B20<br>16 | similar to hypothetical protein LOC284701                                                      | 1.564 | 2.863 |
| 231768_at   | USF1              | upstream transcription factor 1                                                                | 2.396 | 2.863 |
| 204419_x_at | HBG1 /// HBG2     | hemoglobin, gamma A /// hemoglobin, gamma A ///<br>hemoglobin, gamma G /// hemoglobin, gamma G | 1.560 | 2.863 |
| 205654_at   | C4BPA             | complement component 4 binding protein, alpha                                                  | 2.756 | 2.863 |
| 211136_s_at | CLPTM1            | cleft lip and palate associated transmembrane protein 1                                        | 1.628 | 2.863 |
| 232568_at   | MGC24103          | hypothetical protein MGC24103                                                                  | 1.665 | 2.863 |
| 234366_x_at | IGL@              | Immunoglobulin lambda locus                                                                    | 1.641 | 2.863 |
