# Supplementary material
Source: PubMed Central journal article supplement (PMC2733945)
Supplement: NIHMS115013-supplement-02.pdf [file NIHMS115013-supplement-02.pdf]

**Supplementary table 2****Downregulated transcripts in sarcoid vs control with 1.5-fold change or more and q-value < 5%**

| Probe Set ID | Gene Symbol                                | Gene Title                                                                                 | Fold Change | q value (%) |
|--------------|--------------------------------------------|--------------------------------------------------------------------------------------------|-------------|-------------|
| 209840_s_at  | LRRN3                                      | leucine rich repeat neuronal 3                                                             | 0.122       | 0.000       |
| 234396_at    | ---                                        | TCR variable region Va30 subfamily gene (VA30, JA, CA segments), 5' end                    | 0.230       | 0.000       |
| 209841_s_at  | LRRN3                                      | leucine rich repeat neuronal 3                                                             | 0.172       | 0.000       |
| 234013_at    | TRA@                                       | T cell receptor alpha locus /// Clone PSA.S.31 T-cell receptor alpha chain                 | 0.412       | 0.000       |
| 231798_at    | NOG                                        | Noggin                                                                                     | 0.270       | 0.000       |
| 228370_at    | ---                                        | ---                                                                                        | 0.414       | 0.000       |
| 205254_x_at  | TCF7                                       | transcription factor 7 (T-cell specific, HMG-box)                                          | 0.489       | 0.000       |
| 1561363_a_at | ---                                        | CDNA FLJ36285 fis, clone THYMU2003470                                                      | 0.393       | 0.000       |
| 241871_at    | CAMK4                                      | calcium/calmodulin-dependent protein kinase IV                                             | 0.446       | 0.000       |
| 204793_at    | GPRASP1                                    | G protein-coupled receptor associated sorting protein 1                                    | 0.434       | 0.000       |
| 239122_at    | ---                                        | Transcribed locus                                                                          | 0.523       | 0.000       |
| 216133_at    | TRA@                                       | T cell receptor alpha locus                                                                | 0.481       | 0.000       |
| 238649_at    | PITPNC1                                    | phosphatidylinositol transfer protein, cytoplasmic 1                                       | 0.579       | 0.000       |
| 214945_at    | LOC202134 ///<br>NY-REN-7 ///<br>LOC653316 | hypothetical protein LOC202134 /// NY-REN-7 antigen<br>/// hypothetical protein LOC653316  | 0.328       | 0.000       |
| 221221_s_at  | KLHL3                                      | kelch-like 3 (Drosophila)                                                                  | 0.465       | 0.000       |
| 1556402_at   | ---                                        | CDNA FLJ36234 fis, clone THYMU2001314                                                      | 0.447       | 0.000       |
| 206150_at    | CD27                                       | CD27 molecule /// CD27 molecule                                                            | 0.542       | 0.000       |
| 209368_at    | EPHX2                                      | epoxide hydrolase 2, cytoplasmic                                                           | 0.399       | 0.000       |
| 203578_s_at  | SLC7A6                                     | solute carrier family 7 (cationic amino acid transporter, y+ system), member 6             | 0.502       | 0.000       |
| 215967_s_at  | LY9                                        | lymphocyte antigen 9                                                                       | 0.585       | 0.000       |
| 221558_s_at  | LEF1                                       | lymphoid enhancer-binding factor 1                                                         | 0.493       | 0.000       |
| 242292_at    | LOC653687 ///<br>LOC729488                 | similar to melanoma antigen family B, 18 /// similar to chromosome X open reading frame 50 | 0.487       | 0.000       |
| 201849_at    | BNIP3                                      | BCL2/adenovirus E1B 19kDa interacting protein 3                                            | 0.490       | 0.116       |
| 227449_at    | EPHA4                                      | EPH receptor A4                                                                            | 0.447       | 0.116       |
| 1553118_at   | THEM4                                      | thioesterase superfamily member 4                                                          | 0.487       | 0.116       |
| 243735_at    | ---                                        | CDNA FLJ38461 fis, clone FEBRA2020977                                                      | 0.543       | 0.116       |
| 212400_at    | FAM102A                                    | family with sequence similarity 102, member A                                              | 0.532       | 0.116       |
| 210370_s_at  | LY9                                        | lymphocyte antigen 9                                                                       | 0.564       | 0.116       |
| 213170_at    | GPX7                                       | glutathione peroxidase 7                                                                   | 0.485       | 0.116       |
| 221790_s_at  | LDLRAP1                                    | low density lipoprotein receptor adaptor protein 1                                         | 0.581       | 0.116       |
| 228174_at    | GOLGA1                                     | Golgi autoantigen, golgin subfamily a, 1                                                   | 0.472       | 0.116       |
| 222843_at    | FIGNL1                                     | fidgetin-like 1                                                                            | 0.302       | 0.116       |
| 211000_s_at  | IL6ST                                      | interleukin 6 signal transducer (gp130, oncostatin M receptor)                             | 0.443       | 0.116       |
| 204890_s_at  | LCK                                        | lymphocyte-specific protein tyrosine kinase                                                | 0.597       | 0.116       |
| 227686_at    | OXNAD1                                     | oxidoreductase NAD-binding domain containing 1                                             | 0.522       | 0.116       |
| 200965_s_at  | ABLIM1                                     | actin binding LIM protein 1                                                                | 0.569       | 0.116       |
| 228974_at    | ZNF677                                     | Zinc finger protein 677                                                                    | 0.540       | 0.116       |

|              |                           |                                                                                                     |       |       |
|--------------|---------------------------|-----------------------------------------------------------------------------------------------------|-------|-------|
| 215262_at    | OXNAD1                    | Oxidoreductase NAD-binding domain containing 1                                                      | 0.386 | 0.116 |
| 221081_s_at  | DENND2D                   | DENN/MADD domain containing 2D                                                                      | 0.629 | 0.116 |
| 230178_s_at  | ---                       | CDNA FLJ38461 fis, clone FEBRA2020977                                                               | 0.624 | 0.116 |
| 225458_at    | LOC25845                  | hypothetical LOC25845                                                                               | 0.570 | 0.116 |
| 221740_x_at  | LOC728871 ///<br>LRRC37A2 | Hypothetical protein LOC728871 /// Leucine rich repeat containing 37, member A2                     | 0.579 | 0.116 |
| 227796_at    | ZFP62 ///<br>LOC643836    | zinc finger protein 62 homolog (mouse) /// similar to Zinc finger protein 62 homolog (Zfp-62) (ZT3) | 0.512 | 0.116 |
| 202524_s_at  | SPOCK2                    | sparc/osteonectin, cwcv and kazal-like domains proteoglycan (testican) 2                            | 0.590 | 0.116 |
| 57082_at     | LDLRAP1                   | low density lipoprotein receptor adaptor protein 1                                                  | 0.591 | 0.116 |
| 223403_s_at  | POLR1B                    | polymerase (RNA) I polypeptide B, 128kDa                                                            | 0.647 | 0.116 |
| 244798_at    | SERTAD4                   | SERTA domain containing 4                                                                           | 0.251 | 0.116 |
| 203579_s_at  | SLC7A6                    | solute carrier family 7 (cationic amino acid transporter, y+ system), member 6                      | 0.542 | 0.116 |
| 202969_at    | ---                       | MRNA; cDNA DKFZp667B0924 (from clone DKFZp667B0924)                                                 | 0.568 | 0.116 |
| 1554555_a_at | SETD6                     | SET domain containing 6                                                                             | 0.588 | 0.116 |
| 228046_at    | LOC152485                 | Hypothetical protein LOC152485                                                                      | 0.511 | 0.116 |
| 209504_s_at  | PLEKHB1                   | pleckstrin homology domain containing, family B (evectins) member 1                                 | 0.514 | 0.116 |
| 1569652_at   | MLLT3                     | myeloid/lymphoid or mixed-lineage leukemia (trithorax homolog, Drosophila); translocated to, 3      | 0.535 | 0.116 |
| 235436_at    | ---                       | ---                                                                                                 | 0.608 | 0.116 |
| 207971_s_at  | CEP68                     | centrosomal protein 68kDa                                                                           | 0.561 | 0.116 |
| 218667_at    | PJA1                      | praja 1                                                                                             | 0.601 | 0.116 |
| 1552733_at   | KLHDC1                    | kelch domain containing 1                                                                           | 0.527 | 0.116 |
| 225314_at    | OCIAD2                    | OCIA domain containing 2                                                                            | 0.521 | 0.116 |
| 228298_at    | FAM113B                   | family with sequence similarity 113, member B                                                       | 0.577 | 0.116 |
| 212538_at    | DOCK9                     | dedicator of cytokinesis 9                                                                          | 0.535 | 0.116 |
| 210039_s_at  | PRKCQ                     | protein kinase C, theta                                                                             | 0.575 | 0.116 |
| 226272_at    | ---                       | Full length insert cDNA clone ZD79H10                                                               | 0.518 | 0.116 |
| 235085_at    | DKFZp761P04<br>23         | homolog of rat pragma of Rnd2                                                                       | 0.608 | 0.116 |
| 226591_at    | ---                       | CDNA FLJ33569 fis, clone BRAMY2010317                                                               | 0.493 | 0.116 |
| 234339_s_at  | GLTSCR2                   | glioma tumor suppressor candidate region gene 2                                                     | 0.589 | 0.116 |
| 204863_s_at  | IL6ST ///<br>MAGEA4       | interleukin 6 signal transducer (gp130, oncostatin M receptor) /// melanoma antigen family A, 4     | 0.445 | 0.116 |
| 234785_at    | ---                       | ---                                                                                                 | 0.537 | 0.116 |
| 230298_at    | LOC153364                 | similar to metallo-beta-lactamase superfamily protein                                               | 0.530 | 0.116 |
| 225457_s_at  | LOC25845                  | hypothetical LOC25845                                                                               | 0.577 | 0.116 |
| 229007_at    | LOC283788                 | hypothetical protein LOC283788                                                                      | 0.400 | 0.116 |
| 228109_at    | RASGRF2                   | Ras protein-specific guanine nucleotide-releasing factor 2                                          | 0.454 | 0.116 |
| 221757_at    | MGC17330                  | HGFL gene /// HGFL gene                                                                             | 0.589 | 0.116 |
| 221756_at    | MGC17330                  | HGFL gene /// HGFL gene                                                                             | 0.571 | 0.116 |
| 210948_s_at  | LEF1                      | lymphoid enhancer-binding factor 1                                                                  | 0.490 | 0.116 |
| 228423_at    | MAP9                      | microtubule-associated protein 9                                                                    | 0.480 | 0.116 |
| 1555450_a_at | NARG1L                    | NMDA receptor regulated 1-like                                                                      | 0.523 | 0.116 |

|              |                      |                                                                                                                      |       |       |
|--------------|----------------------|----------------------------------------------------------------------------------------------------------------------|-------|-------|
| 211596_s_at  | LRIG1                | leucine-rich repeats and immunoglobulin-like domains 1<br>/// leucine-rich repeats and immunoglobulin-like domains 1 | 0.529 | 0.116 |
| 243154_at    | ---                  | Transcribed locus                                                                                                    | 0.589 | 0.116 |
| 218532_s_at  | FLJ20152             | hypothetical protein FLJ20152                                                                                        | 0.541 | 0.116 |
| 222696_at    | AXIN2                | axin 2 (conductin, axil)                                                                                             | 0.457 | 0.116 |
| 242051_at    | ---                  | Transcribed locus                                                                                                    | 0.442 | 0.116 |
| 1569472_s_at | TTC3                 | tetratricopeptide repeat domain 3                                                                                    | 0.395 | 0.116 |
| 206545_at    | CD28                 | CD28 molecule                                                                                                        | 0.477 | 0.116 |
| 36545_s_at   | SFI1                 | Sfi1 homolog, spindle assembly associated (yeast)                                                                    | 0.593 | 0.116 |
| 218851_s_at  | WDR33                | WD repeat domain 33                                                                                                  | 0.631 | 0.132 |
| 219528_s_at  | BCL11B               | B-cell CLL/lymphoma 11B (zinc finger protein)                                                                        | 0.562 | 0.132 |
| 238524_at    | ---                  | ---                                                                                                                  | 0.625 | 0.132 |
| 1554007_at   | ZNF483               | Zinc finger protein 483                                                                                              | 0.437 | 0.132 |
| 212677_s_at  | CEP68                | centrosomal protein 68kDa                                                                                            | 0.576 | 0.132 |
| 231817_at    | USP53                | ubiquitin specific peptidase 53                                                                                      | 0.428 | 0.132 |
| 228630_at    | ZNF84                | Zinc finger protein 84                                                                                               | 0.602 | 0.132 |
| 202746_at    | ITM2A                | integral membrane protein 2A                                                                                         | 0.561 | 0.132 |
| 227984_at    | LOC650392            | Hypothetical protein LOC650392                                                                                       | 0.317 | 0.132 |
| 1566448_at   | CD6                  | CD6 molecule                                                                                                         | 0.527 | 0.132 |
| 238454_at    | ZNF540               | zinc finger protein 540                                                                                              | 0.487 | 0.132 |
| 224518_s_at  | ZNF559               | zinc finger protein 559 /// zinc finger protein 559                                                                  | 0.597 | 0.132 |
| 1552343_s_at | PDE7A                | phosphodiesterase 7A                                                                                                 | 0.653 | 0.132 |
| 37433_at     | PIAS2                | protein inhibitor of activated STAT, 2                                                                               | 0.636 | 0.132 |
| 218918_at    | MAN1C1               | mannosidase, alpha, class 1C, member 1                                                                               | 0.496 | 0.132 |
| 220418_at    | IFT52 ///<br>UBASH3A | intraflagellar transport 52 homolog (Chlamydomonas) ///<br>ubiquitin associated and SH3 domain containing, A         | 0.546 | 0.132 |
| 212675_s_at  | ---                  | ---                                                                                                                  | 0.589 | 0.132 |
| 1559097_at   | C14orf64             | chromosome 14 open reading frame 64                                                                                  | 0.525 | 0.132 |
| 226388_at    | TCEA3                | transcription elongation factor A (SII), 3                                                                           | 0.441 | 0.132 |
| 224931_at    | SLC41A3              | solute carrier family 41, member 3                                                                                   | 0.602 | 0.132 |
| 1553132_a_at | MTAC2D1              | membrane targeting (tandem) C2 domain containing 1                                                                   | 0.449 | 0.132 |
| 205259_at    | NR3C2                | nuclear receptor subfamily 3, group C, member 2                                                                      | 0.454 | 0.132 |
| 213049_at    | GARNL1               | GTPase activating Rap/RanGAP domain-like 1                                                                           | 0.623 | 0.132 |
| 206337_at    | CCR7                 | chemokine (C-C motif) receptor 7 /// chemokine (C-C motif) receptor 7                                                | 0.543 | 0.132 |
| 204352_at    | TRAF5                | TNF receptor-associated factor 5                                                                                     | 0.609 | 0.132 |
| 1556061_at   | LOC283012            | hypothetical protein LOC283012                                                                                       | 0.576 | 0.132 |
| 1557733_a_at | CHRM3                | Cholinergic receptor, muscarinic 3                                                                                   | 0.429 | 0.132 |
| 239487_at    | FAM98A               | Family with sequence similarity 98, member A                                                                         | 0.565 | 0.132 |
| 204891_s_at  | LCK                  | lymphocyte-specific protein tyrosine kinase                                                                          | 0.636 | 0.132 |
| 1559025_at   | 9-Sep                | septin 9                                                                                                             | 0.528 | 0.132 |
| 232001_at    | LOC439949            | hypothetical gene supported by AY007155                                                                              | 0.554 | 0.132 |
| 211841_s_at  | TNFRSF25             | tumor necrosis factor receptor superfamily, member 25                                                                | 0.535 | 0.132 |
| 238750_at    | ---                  | ---                                                                                                                  | 0.551 | 0.132 |
| 244571_s_at  | TTC12                | Tetratricopeptide repeat domain 12                                                                                   | 0.427 | 0.132 |
| 205372_at    | PLAG1                | pleiomorphic adenoma gene 1                                                                                          | 0.603 | 0.132 |
| 241494_at    | SERINC5              | Serine incorporator 5                                                                                                | 0.457 | 0.132 |
| 204749_at    | NAP1L3               | nucleosome assembly protein 1-like 3                                                                                 | 0.418 | 0.132 |

|              |                                                           |                                                                                                                                                                                |       |       |
|--------------|-----------------------------------------------------------|--------------------------------------------------------------------------------------------------------------------------------------------------------------------------------|-------|-------|
| 212621_at    | KIAA0286                                                  | KIAA0286 protein                                                                                                                                                               | 0.620 | 0.132 |
| 225391_at    | LOC93622                                                  | hypothetical protein BC006130                                                                                                                                                  | 0.599 | 0.132 |
| 205790_at    | SKAP1                                                     | src kinase associated phosphoprotein 1                                                                                                                                         | 0.629 | 0.132 |
| 210972_x_at  | TRA@ ///<br>TRDV2 ///<br>TRAV20 ///<br>TRAJ17 ///<br>TRAC | T cell receptor alpha locus /// T cell receptor delta variable 2 /// T cell receptor alpha variable 20 /// T cell receptor alpha joining 17 /// T cell receptor alpha constant | 0.630 | 0.132 |
| 214193_s_at  | C1orf107                                                  | chromosome 1 open reading frame 107                                                                                                                                            | 0.619 | 0.132 |
| 218510_x_at  | FLJ20152                                                  | hypothetical protein FLJ20152                                                                                                                                                  | 0.573 | 0.132 |
| 212071_s_at  | SPTBN1                                                    | spectrin, beta, non-erythrocytic 1                                                                                                                                             | 0.640 | 0.132 |
| 230069_at    | SFXN1                                                     | sideroflexin 1                                                                                                                                                                 | 0.572 | 0.132 |
| 206039_at    | RAB33A                                                    | RAB33A, member RAS oncogene family                                                                                                                                             | 0.595 | 0.132 |
| 222820_at    | TNRC6C                                                    | trinucleotide repeat containing 6C                                                                                                                                             | 0.598 | 0.132 |
| 204977_at    | DDX10                                                     | DEAD (Asp-Glu-Ala-Asp) box polypeptide 10                                                                                                                                      | 0.557 | 0.132 |
| 244878_at    | MAGED1                                                    | Melanoma antigen family D, 1                                                                                                                                                   | 0.615 | 0.132 |
| 229029_at    | ---                                                       | ---                                                                                                                                                                            | 0.532 | 0.132 |
| 214764_at    | KIAA0507                                                  | KIAA0507                                                                                                                                                                       | 0.589 | 0.132 |
| 213189_at    | MINA                                                      | MYC induced nuclear antigen                                                                                                                                                    | 0.622 | 0.132 |
| 205006_s_at  | NMT2                                                      | N-myristoyltransferase 2                                                                                                                                                       | 0.567 | 0.132 |
| 235522_at    | CLEC2D                                                    | C-type lectin domain family 2, member D                                                                                                                                        | 0.605 | 0.132 |
| 226679_at    | SLC26A11                                                  | solute carrier family 26, member 11                                                                                                                                            | 0.603 | 0.132 |
| 215797_at    | MGC40069                                                  | hypothetical protein MGC40069                                                                                                                                                  | 0.557 | 0.132 |
| 205878_at    | POU6F1                                                    | POU domain, class 6, transcription factor 1                                                                                                                                    | 0.625 | 0.132 |
| 1556472_s_at | SCML4                                                     | sex comb on midleg-like 4 (Drosophila)                                                                                                                                         | 0.623 | 0.132 |
| 212655_at    | ZCCHC14                                                   | zinc finger, CCHC domain containing 14                                                                                                                                         | 0.556 | 0.132 |
| 229629_at    | ---                                                       | Transcribed locus                                                                                                                                                              | 0.544 | 0.132 |
| 227611_at    | TARSL2                                                    | threonyl-tRNA synthetase-like 2                                                                                                                                                | 0.614 | 0.132 |
| 226051_at    | SELM                                                      | selenoprotein M                                                                                                                                                                | 0.471 | 0.132 |
| 202780_at    | OXCT1                                                     | 3-oxoacid CoA transferase 1                                                                                                                                                    | 0.601 | 0.132 |
| 227877_at    | AXIIR                                                     | similar to annexin II receptor                                                                                                                                                 | 0.577 | 0.132 |
| 222895_s_at  | BCL11B                                                    | B-cell CLL/lymphoma 11B (zinc finger protein)                                                                                                                                  | 0.601 | 0.132 |
| 210038_at    | PRKCQ                                                     | protein kinase C, theta                                                                                                                                                        | 0.626 | 0.132 |
| 233543_s_at  | CCDC98                                                    | coiled-coil domain containing 98                                                                                                                                               | 0.481 | 0.132 |
| 209657_s_at  | HSF2                                                      | heat shock transcription factor 2                                                                                                                                              | 0.589 | 0.132 |
| 232014_at    | ZNF30                                                     | zinc finger protein 30                                                                                                                                                         | 0.511 | 0.132 |
| 209670_at    | TRAC                                                      | T cell receptor alpha constant /// T cell receptor alpha constant                                                                                                              | 0.636 | 0.132 |
| 223358_s_at  | ---                                                       | CDNA FLJ33024 fis, clone THYMU1000532, moderately similar to HIGH-AFFINITY CAMP-SPECIFIC 3',5'-CYCLIC PHOSPHODIESTERASE (EC 3.1.4.17)                                          | 0.639 | 0.132 |
| 1553219_a_at | AMMECR1                                                   | Alport syndrome, mental retardation, midface hypoplasia and elliptocytosis chromosomal region, gene 1                                                                          | 0.596 | 0.132 |
| 223161_at    | KIAA1147                                                  | KIAA1147                                                                                                                                                                       | 0.489 | 0.132 |
| 228643_at    | COMMD10                                                   | CDNA clone IMAGE:5277380 /// COMM domain containing 10                                                                                                                         | 0.525 | 0.132 |
| 224490_s_at  | KIAA1267                                                  | KIAA1267 /// KIAA1267                                                                                                                                                          | 0.317 | 0.132 |
| 229544_at    | ---                                                       | CDNA clone IMAGE:4791887 /// MRNA; cDNA DKFZp564C0762 (from clone DKFZp564C0762)                                                                                               | 0.572 | 0.132 |
| 215540_at    | TRA@                                                      | T cell receptor alpha locus                                                                                                                                                    | 0.519 | 0.132 |

|             |                     |                                                                                                                                      |       |       |
|-------------|---------------------|--------------------------------------------------------------------------------------------------------------------------------------|-------|-------|
| 204019_s_at | SH3YL1              | SH3 domain containing, Ysc84-like 1 ( <i>S. cerevisiae</i> )                                                                         | 0.562 | 0.132 |
| 205456_at   | CD3E                | CD3e molecule, epsilon (CD3-TCR complex)                                                                                             | 0.618 | 0.132 |
| 234970_at   | MTAC2D1             | membrane targeting (tandem) C2 domain containing 1                                                                                   | 0.560 | 0.132 |
| 1566446_at  | KLF12               | Kruppel-like factor 12                                                                                                               | 0.648 | 0.132 |
| 203733_at   | DEXI                | dexamethasone-induced transcript                                                                                                     | 0.665 | 0.132 |
| 211339_s_at | ITK                 | IL2-inducible T-cell kinase                                                                                                          | 0.589 | 0.132 |
| 212894_at   | SUPV3L1             | suppressor of var1, 3-like 1 ( <i>S. cerevisiae</i> )                                                                                | 0.642 | 0.132 |
| 210858_x_at | ATM                 | ataxia telangiectasia mutated (includes complementation groups A, C and D)                                                           | 0.666 | 0.132 |
| 239644_at   | FLJ37440            | Hypothetical protein FLJ37440                                                                                                        | 0.633 | 0.132 |
| 223477_s_at | FLJ38663            | hypothetical protein FLJ38663                                                                                                        | 0.595 | 0.132 |
| 203386_at   | TBC1D4              | TBC1 domain family, member 4                                                                                                         | 0.550 | 0.132 |
| 234377_at   | IL23A               | interleukin 23, alpha subunit p19                                                                                                    | 0.582 | 0.132 |
| 209501_at   | CDR2                | cerebellar degeneration-related protein 2, 62kDa                                                                                     | 0.618 | 0.132 |
| 219734_at   | SIDT1               | SID1 transmembrane family, member 1                                                                                                  | 0.663 | 0.132 |
| 213262_at   | SACS                | spastic ataxia of Charlevoix-Saguenay (sacsin)                                                                                       | 0.495 | 0.132 |
| 224580_at   | SLC38A1             | solute carrier family 38, member 1                                                                                                   | 0.540 | 0.132 |
| 241365_at   | ---                 | CDNA FLJ42259 fis, clone TKIDN2011289                                                                                                | 0.582 | 0.132 |
| 227867_at   | LOC129293           | hypothetical protein LOC129293                                                                                                       | 0.543 | 0.132 |
| 207826_s_at | ID3                 | inhibitor of DNA binding 3, dominant negative helix-loop-helix protein                                                               | 0.561 | 0.132 |
| 202431_s_at | MYC                 | v-myc myelocytomatosis viral oncogene homolog (avian)                                                                                | 0.617 | 0.132 |
| 209671_x_at | TRA@ ///<br>TRAC    | T cell receptor alpha locus /// T cell receptor alpha locus<br>/// T cell receptor alpha constant /// T cell receptor alpha constant | 0.663 | 0.132 |
| 228539_at   | ---                 | Transcribed locus                                                                                                                    | 0.592 | 0.132 |
| 208744_x_at | HSPH1               | heat shock 105kDa/110kDa protein 1                                                                                                   | 0.663 | 0.132 |
| 219915_s_at | SLC16A10            | solute carrier family 16, member 10 (aromatic amino acid transporter)                                                                | 0.441 | 0.132 |
| 231979_at   | GABPB2              | GA binding protein transcription factor, beta subunit 2                                                                              | 0.412 | 0.132 |
| 234819_at   | ---                 | TCR alpha variable region (clone XIPHER47 I)                                                                                         | 0.512 | 0.132 |
| 205356_at   | USP13               | ubiquitin specific peptidase 13 (isopeptidase T-3)                                                                                   | 0.602 | 0.132 |
| 1563217_at  | PKIA                | Protein kinase (cAMP-dependent, catalytic) inhibitor alpha                                                                           | 0.460 | 0.132 |
| 227093_at   | USP36               | Ubiquitin specific peptidase 36                                                                                                      | 0.661 | 0.132 |
| 231919_at   | DBT                 | dihydrolipoamide branched chain transacylase E2                                                                                      | 0.607 | 0.132 |
| 205798_at   | IL7R                | interleukin 7 receptor /// interleukin 7 receptor                                                                                    | 0.605 | 0.132 |
| 206042_x_at | SNRPN ///<br>SNURF  | small nuclear ribonucleoprotein polypeptide N ///<br>SNRPN upstream reading frame                                                    | 0.656 | 0.132 |
| 222147_s_at | HBZ                 | Hemoglobin, zeta                                                                                                                     | 0.599 | 0.132 |
| 218375_at   | NUDT9               | nudix (nucleoside diphosphate linked moiety X)-type motif 9                                                                          | 0.658 | 0.132 |
| 219378_at   | NARG1L              | NMDA receptor regulated 1-like                                                                                                       | 0.625 | 0.132 |
| 220349_s_at | FLJ21865            | endo-beta-N-acetylglucosaminidase                                                                                                    | 0.620 | 0.132 |
| 221602_s_at | FAIM3               | Fas apoptotic inhibitory molecule 3 /// Fas apoptotic inhibitory molecule 3                                                          | 0.638 | 0.132 |
| 225747_at   | ABCD4 ///<br>COQ10A | ATP-binding cassette, sub-family D (ALD), member 4 ///<br>coenzyme Q10 homolog A ( <i>S. cerevisiae</i> )                            | 0.627 | 0.132 |
| 218932_at   | C1orf181            | chromosome 1 open reading frame 181                                                                                                  | 0.606 | 0.132 |

|             |           |                                                                                                |       |       |
|-------------|-----------|------------------------------------------------------------------------------------------------|-------|-------|
| 238694_at   | ---       | Transcribed locus                                                                              | 0.560 | 0.132 |
| 208806_at   | CHD3      | chromodomain helicase DNA binding protein 3                                                    | 0.615 | 0.132 |
| 225886_at   | ---       | Full-length cDNA clone CS0DF030YM05 of Fetal brain of Homo sapiens (human)                     | 0.618 | 0.132 |
| 224579_at   | SLC38A1   | solute carrier family 38, member 1                                                             | 0.617 | 0.132 |
| 214855_s_at | GARNL1    | GTPase activating Rap/RanGAP domain-like 1                                                     | 0.596 | 0.132 |
| 221726_at   | RPL22     | ribosomal protein L22                                                                          | 0.664 | 0.132 |
| 226604_at   | TMTC3     | transmembrane and tetratricopeptide repeat containing 3                                        | 0.498 | 0.132 |
| 226181_at   | TUBE1     | tubulin, epsilon 1                                                                             | 0.538 | 0.132 |
| 204700_x_at | C1orf107  | chromosome 1 open reading frame 107                                                            | 0.642 | 0.132 |
| 222557_at   | STMN3     | stathmin-like 3                                                                                | 0.604 | 0.132 |
| 226483_at   | TMEM68    | transmembrane protein 68                                                                       | 0.611 | 0.132 |
| 208073_x_at | TTC3      | tetratricopeptide repeat domain 3                                                              | 0.656 | 0.132 |
| 224719_s_at | C12orf57  | chromosome 12 open reading frame 57                                                            | 0.543 | 0.132 |
| 227502_at   | RDX       | radixin                                                                                        | 0.608 | 0.132 |
| 210645_s_at | TTC3      | tetratricopeptide repeat domain 3                                                              | 0.639 | 0.132 |
| 212121_at   | C10orf61  | chromosome 10 open reading frame 61                                                            | 0.659 | 0.132 |
| 211902_x_at | TRA@      | T cell receptor alpha locus                                                                    | 0.649 | 0.132 |
| 239442_at   | CEP68     | Centrosomal protein 68kDa                                                                      | 0.632 | 0.132 |
| 208249_s_at | TGDS      | TDP-glucose 4,6-dehydratase                                                                    | 0.584 | 0.132 |
| 202931_x_at | BIN1      | bridging integrator 1                                                                          | 0.666 | 0.132 |
| 210202_s_at | BIN1      | bridging integrator 1                                                                          | 0.654 | 0.132 |
| 230083_at   | ---       | Full length insert cDNA clone YI48C03                                                          | 0.362 | 0.132 |
| 204918_s_at | MLLT3     | myeloid/lymphoid or mixed-lineage leukemia (trithorax homolog, Drosophila); translocated to, 3 | 0.566 | 0.132 |
| 209798_at   | NPAT      | nuclear protein, ataxia-telangiectasia locus                                                   | 0.661 | 0.132 |
| 225158_at   | GFM1      | G elongation factor, mitochondrial 1                                                           | 0.642 | 0.132 |
| 234106_s_at | FLYWCH1   | FLYWCH-type zinc finger 1                                                                      | 0.566 | 0.132 |
| 212634_at   | KIAA0776  | KIAA0776                                                                                       | 0.598 | 0.132 |
| 235697_at   | ZNF544    | Zinc finger protein 544                                                                        | 0.545 | 0.132 |
| 227361_at   | ---       | ---                                                                                            | 0.588 | 0.132 |
| 241299_at   | C16orf30  | Chromosome 16 open reading frame 30                                                            | 0.541 | 0.132 |
| 239726_at   | ANK3      | Ankyrin 3, node of Ranvier (ankyrin G)                                                         | 0.487 | 0.132 |
| 215030_at   | GRSF1     | G-rich RNA sequence binding factor 1                                                           | 0.636 | 0.132 |
| 239794_at   | IARS      | Isoleucine-tRNA synthetase                                                                     | 0.617 | 0.132 |
| 206385_s_at | ANK3      | ankyrin 3, node of Ranvier (ankyrin G)                                                         | 0.477 | 0.132 |
| 218882_s_at | WDR3      | WD repeat domain 3                                                                             | 0.665 | 0.132 |
| 222275_at   | ---       | ---                                                                                            | 0.649 | 0.132 |
| 218877_s_at | TRMT11    | tRNA methyltransferase 11 homolog (S. cerevisiae)                                              | 0.532 | 0.132 |
| 226327_at   | ZNF507    | zinc finger protein 507                                                                        | 0.588 | 0.132 |
| 209068_at   | HNRPDL    | heterogeneous nuclear ribonucleoprotein D-like                                                 | 0.628 | 0.132 |
| 1560659_at  | ---       | ---                                                                                            | 0.623 | 0.132 |
| 215440_s_at | BEXL1     | brain expressed X-linked-like 1                                                                | 0.630 | 0.132 |
| 242969_at   | ---       | Transcribed locus                                                                              | 0.662 | 0.132 |
| 209750_at   | NR1D2     | nuclear receptor subfamily 1, group D, member 2                                                | 0.448 | 0.132 |
| 231940_at   | ZNF529    | zinc finger protein 529                                                                        | 0.627 | 0.132 |
| 219423_x_at | TNFRSF25  | tumor necrosis factor receptor superfamily, member 25                                          | 0.572 | 0.132 |
| 204951_at   | RHOH      | ras homolog gene family, member H                                                              | 0.610 | 0.132 |
| 226881_at   | GRPEL2    | GrpE-like 2, mitochondrial (E. coli)                                                           | 0.570 | 0.132 |
| 229963_at   | NGFRAP1L1 | NGFRAP1-like 1                                                                                 | 0.458 | 0.132 |

|              |                         |                                                                                                                                                                             |       |       |
|--------------|-------------------------|-----------------------------------------------------------------------------------------------------------------------------------------------------------------------------|-------|-------|
| 210847_x_at  | TNFRSF25 ///<br>PLEKHG5 | tumor necrosis factor receptor superfamily, member 25<br>/// pleckstrin homology domain containing, family G<br>(with RhoGef domain) member 5                               | 0.557 | 0.132 |
| 203413_at    | NELL2                   | NEL-like 2 (chicken) /// NEL-like 2 (chicken)                                                                                                                               | 0.573 | 0.132 |
| 215211_at    | ---                     | Clone 23832 mRNA sequence                                                                                                                                                   | 0.428 | 0.132 |
| 212672_at    | ATM                     | ataxia telangiectasia mutated (includes<br>complementation groups A, C and D)                                                                                               | 0.636 | 0.132 |
| 217412_at    | ---                     | Rearranged T-cell receptor alpha chain mRNA, variable<br>region                                                                                                             | 0.567 | 0.132 |
| 230444_at    | MTFR1                   | Mitochondrial fission regulator 1                                                                                                                                           | 0.654 | 0.132 |
| 211874_s_at  | MYST4                   | MYST histone acetyltransferase (monocytic leukemia) 4                                                                                                                       | 0.590 | 0.132 |
| 214439_x_at  | BIN1                    | bridging integrator 1                                                                                                                                                       | 0.665 | 0.132 |
| 244272_s_at  | MTAC2D1                 | Membrane targeting (tandem) C2 domain containing 1                                                                                                                          | 0.662 | 0.132 |
| 215307_at    | ZNF529                  | Zinc finger protein 529                                                                                                                                                     | 0.529 | 0.132 |
| 226611_s_at  | PRR6                    | proline rich 6                                                                                                                                                              | 0.633 | 0.132 |
| 239212_at    | LTV1                    | LTV1 homolog (S. cerevisiae)                                                                                                                                                | 0.658 | 0.132 |
| 224162_s_at  | FBXO31                  | F-box protein 31                                                                                                                                                            | 0.636 | 0.132 |
| 213269_at    | ZNF248                  | zinc finger protein 248                                                                                                                                                     | 0.590 | 0.132 |
| 216305_s_at  | C2orf3                  | chromosome 2 open reading frame 3                                                                                                                                           | 0.621 | 0.132 |
| 1554771_at   | ---                     | CDNA clone IMAGE:4300887                                                                                                                                                    | 0.619 | 0.132 |
| 203263_s_at  | ARHGEF9                 | Cdc42 guanine nucleotide exchange factor (GEF) 9                                                                                                                            | 0.610 | 0.132 |
| 222108_at    | AMIGO2                  | adhesion molecule with Ig-like domain 2                                                                                                                                     | 0.561 | 0.132 |
| 220582_at    | ---                     | ---                                                                                                                                                                         | 0.465 | 0.132 |
| 203387_s_at  | TBC1D4                  | TBC1 domain family, member 4                                                                                                                                                | 0.551 | 0.132 |
| 213958_at    | CD6                     | CD6 molecule /// CD6 molecule                                                                                                                                               | 0.647 | 0.183 |
| 229141_at    | WDR33                   | WD repeat domain 33                                                                                                                                                         | 0.660 | 0.183 |
| 217729_s_at  | AES                     | amino-terminal enhancer of split                                                                                                                                            | 0.638 | 0.183 |
| 207979_s_at  | CD8B                    | CD8b molecule                                                                                                                                                               | 0.572 | 0.183 |
| 244267_at    | ---                     | ---                                                                                                                                                                         | 0.541 | 0.183 |
| 226218_at    | IL7R                    | interleukin 7 receptor                                                                                                                                                      | 0.579 | 0.183 |
| 202983_at    | HLTF                    | helicase-like transcription factor                                                                                                                                          | 0.587 | 0.183 |
| 214820_at    | BRWD1                   | bromodomain and WD repeat domain containing 1                                                                                                                               | 0.580 | 0.183 |
| 203385_at    | DGKA ///<br>BCDO2       | diacylglycerol kinase, alpha 80kDa /// beta-carotene<br>dioxygenase 2                                                                                                       | 0.650 | 0.183 |
| 227810_at    | ZNF558                  | zinc finger protein 558                                                                                                                                                     | 0.611 | 0.183 |
| 203245_s_at  | FLJ35348                | FLJ35348                                                                                                                                                                    | 0.639 | 0.183 |
| 52940_at     | SIGIRR                  | single immunoglobulin and toll-interleukin 1 receptor<br>(TIR) domain                                                                                                       | 0.664 | 0.183 |
| 226749_at    | MRPS9                   | mitochondrial ribosomal protein S9                                                                                                                                          | 0.637 | 0.183 |
| 208442_s_at  | ATM ///<br>LOC651610    | ataxia telangiectasia mutated (includes<br>complementation groups A, C and D) /// similar to<br>Serine-protein kinase ATM (Ataxia telangiectasia<br>mutated) (A-T, mutated) | 0.632 | 0.183 |
| 231449_at    | ---                     | Transcribed locus                                                                                                                                                           | 0.548 | 0.183 |
| 1552315_at   | GIMAP1                  | GTPase, IMAP family member 1                                                                                                                                                | 0.642 | 0.183 |
| 228655_at    | ---                     | Unknown mRNA sequence                                                                                                                                                       | 0.579 | 0.183 |
| 218710_at    | TTC27                   | tetratricopeptide repeat domain 27                                                                                                                                          | 0.639 | 0.183 |
| 224780_at    | RBM17                   | RNA binding motif protein 17                                                                                                                                                | 0.659 | 0.183 |
| 1553719_s_at | ZNF548                  | zinc finger protein 548                                                                                                                                                     | 0.539 | 0.183 |
| 215411_s_at  | TRAF3IP2                | TRAF3 interacting protein 2                                                                                                                                                 | 0.645 | 0.183 |

|             |           |                                                                                                      |       |       |
|-------------|-----------|------------------------------------------------------------------------------------------------------|-------|-------|
| 202968_s_at | DYRK2     | dual-specificity tyrosine-(Y)-phosphorylation regulated kinase 2                                     | 0.667 | 0.183 |
| 228314_at   | ---       | ---                                                                                                  | 0.650 | 0.183 |
| 231775_at   | TNFRSF10A | tumor necrosis factor receptor superfamily, member 10a                                               | 0.635 | 0.183 |
| 204612_at   | PKIA      | protein kinase (cAMP-dependent, catalytic) inhibitor alpha                                           | 0.501 | 0.183 |
| 207623_at   | ABCF2     | ATP-binding cassette, sub-family F (GCN20), member 2                                                 | 0.468 | 0.183 |
| 229725_at   | ACSL6     | Acyl-CoA synthetase long-chain family member 6                                                       | 0.486 | 0.183 |
| 210807_s_at | SLC16A7   | solute carrier family 16, member 7 (monocarboxylic acid transporter 2)                               | 0.577 | 0.183 |
| 235304_at   | ZNF573    | Zinc finger protein 573                                                                              | 0.627 | 0.183 |
| 211005_at   | LAT       | linker for activation of T cells                                                                     | 0.647 | 0.183 |
| 212977_at   | CXCR7     | chemokine (C-X-C motif) receptor 7                                                                   | 0.641 | 0.183 |
| 215177_s_at | ITGA6     | integrin, alpha 6                                                                                    | 0.562 | 0.183 |
| 218793_s_at | SCML1     | sex comb on midleg-like 1 (Drosophila)                                                               | 0.502 | 0.183 |
| 209421_at   | MSH2      | mutS homolog 2, colon cancer, nonpolyposis type 1 (E. coli)                                          | 0.611 | 0.183 |
| 217950_at   | NOSIP     | nitric oxide synthase interacting protein                                                            | 0.657 | 0.183 |
| 201656_at   | ITGA6     | integrin, alpha 6                                                                                    | 0.643 | 0.183 |
| 219658_at   | PTCD2     | pentatricopeptide repeat domain 2                                                                    | 0.596 | 0.183 |
| 232584_at   | TSHZ2     | Teashirt family zinc finger 2                                                                        | 0.354 | 0.183 |
| 221011_s_at | LBH       | limb bud and heart development homolog (mouse) ///<br>limb bud and heart development homolog (mouse) | 0.659 | 0.183 |
| 233849_s_at | ARHGAP5   | Rho GTPase activating protein 5                                                                      | 0.478 | 0.183 |
| 201030_x_at | LDHB      | lactate dehydrogenase B                                                                              | 0.624 | 0.183 |
| 212314_at   | KIAA0746  | KIAA0746 protein                                                                                     | 0.616 | 0.183 |
| 228843_at   | ---       | Full length insert cDNA clone YZ38E04                                                                | 0.565 | 0.183 |
| 229070_at   | C6orf105  | chromosome 6 open reading frame 105                                                                  | 0.319 | 0.183 |
| 216711_s_at | TAF1      | TAF1 RNA polymerase II, TATA box binding protein (TBP)-associated factor, 250kDa                     | 0.586 | 0.183 |
| 225470_at   | NUP35     | nucleoporin 35kDa                                                                                    | 0.588 | 0.183 |
| 225112_at   | ABI2      | abl interactor 2                                                                                     | 0.631 | 0.183 |
| 225903_at   | PIGU      | phosphatidylinositol glycan anchor biosynthesis, class U                                             | 0.641 | 0.183 |
| 236520_at   | FKBP1A    | FK506 binding protein 1A, 12kDa                                                                      | 0.660 | 0.183 |
| 223506_at   | ZC3H8     | zinc finger CCCH-type containing 8                                                                   | 0.648 | 0.183 |
| 227600_at   | ---       | Full-length cDNA clone CS0DK012YA15 of HeLa cells<br>Cot 25-normalized of Homo sapiens (human)       | 0.600 | 0.183 |
| 220755_s_at | C6orf48   | chromosome 6 open reading frame 48                                                                   | 0.610 | 0.183 |
| 209871_s_at | APBA2     | amyloid beta (A4) precursor protein-binding, family A, member 2 (X11-like)                           | 0.565 | 0.183 |
| 205376_at   | INPP4B    | inositol polyphosphate-4-phosphatase, type II, 105kDa                                                | 0.534 | 0.183 |
| 227900_at   | CBLB      | Cas-Br-M (murine) ecotropic retroviral transforming sequence b                                       | 0.633 | 0.183 |
| 235046_at   | ---       | Transcribed locus                                                                                    | 0.468 | 0.183 |
| 230489_at   | CD5       | CD5 molecule                                                                                         | 0.649 | 0.183 |
| 230078_at   | RAPGEF6   | Rap guanine nucleotide exchange factor (GEF) 6                                                       | 0.651 | 0.183 |
| 227105_at   | CSPP1     | centrosome and spindle pole associated protein 1                                                     | 0.640 | 0.183 |
| 224308_s_at | INTS2     | integrator complex subunit 2                                                                         | 0.618 | 0.183 |

|              |                |                                                                                                                   |       |       |
|--------------|----------------|-------------------------------------------------------------------------------------------------------------------|-------|-------|
| 1569872_a_at | LOC650392      | Full-length cDNA clone CS0DF015YK23 of Fetal brain of Homo sapiens (human) /// Hypothetical protein LOC650392     | 0.364 | 0.183 |
| 243729_at    | C14orf161      | Chromosome 14 open reading frame 161                                                                              | 0.613 | 0.183 |
| 244663_at    | ---            | Transcribed locus                                                                                                 | 0.566 | 0.183 |
| 210425_x_at  | GOLGA8B        | golgi autoantigen, golgin subfamily a, 8B                                                                         | 0.566 | 0.183 |
| 218346_s_at  | SESN1          | sestrin 1                                                                                                         | 0.615 | 0.183 |
| 205961_s_at  | PSIP1          | PC4 and SFRS1 interacting protein 1                                                                               | 0.612 | 0.183 |
| 1553099_at   | TIGD1          | tigger transposable element derived 1                                                                             | 0.590 | 0.183 |
| 224721_at    | WDR75          | WD repeat domain 75                                                                                               | 0.632 | 0.183 |
| 229202_at    | ---            | Transcribed locus                                                                                                 | 0.568 | 0.183 |
| 230285_at    | DKFZp313A2432  | hypothetical protein DKFZp313A2432                                                                                | 0.536 | 0.183 |
| 206966_s_at  | KLF12          | Kruppel-like factor 12                                                                                            | 0.641 | 0.183 |
| 235274_at    | GABPB2         | GA binding protein transcription factor, beta subunit 2                                                           | 0.528 | 0.183 |
| 1555882_at   | SPIN3          | spindlin family, member 3                                                                                         | 0.318 | 0.183 |
| 229414_at    | PITPNC1        | phosphatidylinositol transfer protein, cytoplasmic 1                                                              | 0.596 | 0.183 |
| 215796_at    | ---            | T-cell receptor active alpha-chain V-region (V-J-C) mRNA, partial cds, clone AG212                                | 0.485 | 0.183 |
| 218768_at    | NUP107         | nucleoporin 107kDa                                                                                                | 0.635 | 0.183 |
| 1553111_a_at | KBTBD6         | kelch repeat and BTB (POZ) domain containing 6                                                                    | 0.642 | 0.183 |
| 1568983_a_at | GABPB2         | GA binding protein transcription factor, beta subunit 2                                                           | 0.468 | 0.183 |
| 1555613_a_at | ZAP70          | zeta-chain (TCR) associated protein kinase 70kDa                                                                  | 0.657 | 0.183 |
| 229035_s_at  | KLHDC4         | kelch domain containing 4                                                                                         | 0.617 | 0.183 |
| 232171_x_at  | KLHDC4         | kelch domain containing 4                                                                                         | 0.593 | 0.183 |
| 1560089_at   | LOC286208      | hypothetical protein LOC286208                                                                                    | 0.637 | 0.183 |
| 221691_x_at  | NPM1           | nucleophosmin (nucleolar phosphoprotein B23, numatrin) /// nucleophosmin (nucleolar phosphoprotein B23, numatrin) | 0.629 | 0.183 |
| 226039_at    | MGAT4A         | mannosyl (alpha-1,3-)-glycoprotein beta-1,4-N-acetylglucosaminyltransferase, isozyme A                            | 0.604 | 0.183 |
| 211272_s_at  | DGKA           | diacylglycerol kinase, alpha 80kDa                                                                                | 0.584 | 0.183 |
| 237753_at    | ---            | Transcribed locus                                                                                                 | 0.657 | 0.183 |
| 223300_s_at  | CCDC82         | coiled-coil domain containing 82                                                                                  | 0.498 | 0.183 |
| 208424_s_at  | CIAPIN1        | cytokine induced apoptosis inhibitor 1                                                                            | 0.660 | 0.183 |
| 1556047_s_at | MAGEE1         | melanoma antigen family E, 1                                                                                      | 0.638 | 0.183 |
| 238457_at    | ---            | CDNA FLJ33029 fis, clone THYMU2000162                                                                             | 0.638 | 0.183 |
| 231146_at    | FAM24B         | family with sequence similarity 24, member B                                                                      | 0.511 | 0.183 |
| 1555626_a_at | SLAMF1         | signaling lymphocytic activation molecule family member 1                                                         | 0.589 | 0.183 |
| 212693_at    | MDN1           | MDN1, midasin homolog (yeast)                                                                                     | 0.636 | 0.183 |
| 236401_at    | GIMAP5         | GTPase, IMAP family member 5                                                                                      | 0.658 | 0.183 |
| 232000_at    | C9orf52        | Chromosome 9 open reading frame 52                                                                                | 0.583 | 0.183 |
| 213564_x_at  | LDHB           | lactate dehydrogenase B                                                                                           | 0.645 | 0.183 |
| 229869_at    | ---            | Transcribed locus                                                                                                 | 0.641 | 0.183 |
| 234297_at    | PDCD6 /// RGS8 | Programmed cell death 6 /// Regulator of G-protein signalling 8                                                   | 0.659 | 0.183 |
| 215314_at    | ANK3           | Ankyrin 3, node of Ranvier (ankyrin G)                                                                            | 0.520 | 0.183 |
| 201675_at    | AKAP1          | A kinase (PRKA) anchor protein 1                                                                                  | 0.626 | 0.183 |
| 225794_s_at  | C22orf32       | chromosome 22 open reading frame 32                                                                               | 0.656 | 0.183 |

|             |                        |                                                                                                             |       |       |
|-------------|------------------------|-------------------------------------------------------------------------------------------------------------|-------|-------|
| 200995_at   | IPO7                   | Importin 7                                                                                                  | 0.659 | 0.183 |
| 219315_s_at | C16orf30               | chromosome 16 open reading frame 30                                                                         | 0.547 | 0.183 |
| 222266_at   | C19orf2                | Chromosome 19 open reading frame 2                                                                          | 0.662 | 0.183 |
| 212828_at   | SYNJ2                  | synaptojanin 2                                                                                              | 0.486 | 0.183 |
| 214551_s_at | CD7                    | CD7 molecule                                                                                                | 0.660 | 0.183 |
| 229317_at   | ---                    | ---                                                                                                         | 0.552 | 0.183 |
| 224489_at   | KIAA1267               | KIAA1267 /// KIAA1267                                                                                       | 0.277 | 0.183 |
| 240865_at   | ---                    | ---                                                                                                         | 0.519 | 0.183 |
| 243521_at   | ---                    | Transcribed locus                                                                                           | 0.578 | 0.183 |
| 232589_at   | ---                    | CDNA FLJ11489 fis, clone HEMBA1001915                                                                       | 0.627 | 0.183 |
| 212771_at   | C10orf38               | chromosome 10 open reading frame 38                                                                         | 0.598 | 0.183 |
| 1564154_at  | ---                    | ---                                                                                                         | 0.649 | 0.183 |
| 239973_at   | ---                    | Full-length cDNA clone CS0DJ013YE21 of T cells (Jurkat cell line) Cot 10-normalized of Homo sapiens (human) | 0.641 | 0.183 |
| 218533_s_at | UCKL1                  | uridine-cytidine kinase 1-like 1                                                                            | 0.593 | 0.183 |
| 227117_at   | ---                    | CDNA FLJ40762 fis, clone TRACH2002847                                                                       | 0.630 | 0.183 |
| 226383_at   | C11orf46               | Chromosome 11 open reading frame 46                                                                         | 0.553 | 0.183 |
| 202516_s_at | DLG1                   | discs, large homolog 1 (Drosophila)                                                                         | 0.579 | 0.183 |
| 210424_s_at | GOLGA8A ///<br>GOLGA8B | golgi autoantigen, golgin subfamily a, 8A /// golgi autoantigen, golgin subfamily a, 8B                     | 0.533 | 0.183 |
| 213584_s_at | CREBZF                 | CREB/ATF bZIP transcription factor                                                                          | 0.566 | 0.183 |
| 202514_at   | DLG1                   | discs, large homolog 1 (Drosophila)                                                                         | 0.619 | 0.183 |
| 236293_at   | RHOH                   | Ras homolog gene family, member H                                                                           | 0.586 | 0.183 |
| 244347_at   | C10orf61               | Chromosome 10 open reading frame 61                                                                         | 0.593 | 0.183 |
| 214093_s_at | FUBP1                  | far upstream element (FUSE) binding protein 1                                                               | 0.616 | 0.183 |
| 204773_at   | IL11RA                 | interleukin 11 receptor, alpha                                                                              | 0.571 | 0.183 |
| 210439_at   | ICOS                   | inducible T-cell co-stimulator                                                                              | 0.479 | 0.183 |
| 227415_at   | LOC283508              | hypothetical protein LOC283508                                                                              | 0.522 | 0.183 |
| 222457_s_at | LIMA1                  | LIM domain and actin binding 1                                                                              | 0.528 | 0.183 |
| 239278_at   | ---                    | CDNA clone IMAGE:5301129                                                                                    | 0.563 | 0.183 |
| 228905_at   | ---                    | Transcribed locus                                                                                           | 0.559 | 0.183 |
| 203410_at   | AP3M2                  | adaptor-related protein complex 3, mu 2 subunit                                                             | 0.610 | 0.183 |
| 1556471_at  | SCML4                  | sex comb on midleg-like 4 (Drosophila)                                                                      | 0.656 | 0.183 |
| 227805_at   | ---                    | Transcribed locus                                                                                           | 0.588 | 0.183 |
| 213434_at   | STX2                   | syntaxin 2                                                                                                  | 0.607 | 0.183 |
| 212690_at   | DDHD2                  | DDHD domain containing 2                                                                                    | 0.631 | 0.183 |
| 227077_at   | ZNF286                 | zinc finger protein 286                                                                                     | 0.581 | 0.183 |
| 216503_s_at | MLLT10                 | myeloid/lymphoid or mixed-lineage leukemia (trithorax homolog, Drosophila); translocated to, 10             | 0.660 | 0.183 |
| 226479_at   | KBTBD6                 | kelch repeat and BTB (POZ) domain containing 6                                                              | 0.558 | 0.183 |
| 210073_at   | ST8SIA1                | ST8 alpha-N-acetyl-neuraminide alpha-2,8-sialyltransferase 1                                                | 0.580 | 0.183 |
| 202742_s_at | PRKACB                 | protein kinase, cAMP-dependent, catalytic, beta                                                             | 0.542 | 0.183 |
| 222920_s_at | KIAA0748               | KIAA0748                                                                                                    | 0.620 | 0.183 |
| 203774_at   | MTR                    | 5-methyltetrahydrofolate-homocysteine methyltransferase                                                     | 0.665 | 0.183 |
| 203678_at   | MTMR15                 | myotubularin related protein 15                                                                             | 0.559 | 0.183 |
| 209337_at   | PSIP1                  | PC4 and SFRS1 interacting protein 1                                                                         | 0.590 | 0.183 |
| 233214_at   | KLHL23                 | Kelch-like 23 (Drosophila)                                                                                  | 0.598 | 0.183 |
| 211282_x_at | TNFRSF25               | tumor necrosis factor receptor superfamily, member 25                                                       | 0.607 | 0.183 |

|              |           |                                                                                                                                                 |       |       |
|--------------|-----------|-------------------------------------------------------------------------------------------------------------------------------------------------|-------|-------|
| 226969_at    | LOC149448 | hypothetical protein LOC149448                                                                                                                  | 0.637 | 0.183 |
| 213587_s_at  | ATP6V0E2  | ATPase, H <sup>+</sup> transporting V0 subunit e2                                                                                               | 0.649 | 0.183 |
| 225553_at    | ---       | CDNA FLJ12874 fis, clone NT2RP2003769                                                                                                           | 0.636 | 0.183 |
| 241619_at    | CALM1     | calmodulin 1 (phosphorylase kinase, delta)                                                                                                      | 0.651 | 0.183 |
| 206761_at    | CD96      | CD96 molecule                                                                                                                                   | 0.660 | 0.183 |
| 55872_at     | GM632     | KIAA1196 protein                                                                                                                                | 0.645 | 0.183 |
| 212195_at    | IL6ST     | Interleukin 6 signal transducer (gp130, oncostatin M receptor)                                                                                  | 0.622 | 0.183 |
| 225048_at    | PHF10     | PHD finger protein 10                                                                                                                           | 0.571 | 0.183 |
| 202268_s_at  | APPBP1    | amyloid beta precursor protein binding protein 1                                                                                                | 0.618 | 0.183 |
| 227934_at    | ---       | ---                                                                                                                                             | 0.624 | 0.183 |
| 223486_at    | GTPBP8    | GTP-binding protein 8 (putative)                                                                                                                | 0.660 | 0.183 |
| 224870_at    | KIAA0114  | KIAA0114                                                                                                                                        | 0.646 | 0.183 |
| 212413_at    | 6-Sep     | septin 6                                                                                                                                        | 0.667 | 0.183 |
| 1558826_at   | C20orf174 | chromosome 20 open reading frame 174                                                                                                            | 0.543 | 0.183 |
| 225044_at    | NT5C3L    | 5'-nucleotidase, cytosolic III-like                                                                                                             | 0.572 | 0.183 |
| 217403_s_at  | ZNF227    | zinc finger protein 227                                                                                                                         | 0.634 | 0.183 |
| 219029_at    | C5orf28   | chromosome 5 open reading frame 28                                                                                                              | 0.562 | 0.183 |
| 224634_at    | GPATCH4   | G patch domain containing 4                                                                                                                     | 0.645 | 0.183 |
| 217599_s_at  | MDFIC     | MyoD family inhibitor domain containing                                                                                                         | 0.638 | 0.183 |
| 1555356_a_at | SCML4     | sex comb on midleg-like 4 (Drosophila)                                                                                                          | 0.655 | 0.183 |
| 228841_at    | LYRM7     | Lym7 homolog (mouse)                                                                                                                            | 0.651 | 0.183 |
| 218689_at    | FANCF     | Fanconi anemia, complementation group F                                                                                                         | 0.653 | 0.183 |
| 241925_x_at  | ---       | Transcribed locus                                                                                                                               | 0.602 | 0.183 |
| 229881_at    | KLF12     | Kruppel-like factor 12                                                                                                                          | 0.596 | 0.183 |
| 231075_x_at  | RAPH1     | Ras association (RalGDS/AF-6) and pleckstrin homology domains 1                                                                                 | 0.656 | 0.183 |
| 222669_s_at  | SBDS      | Shwachman-Bodian-Diamond syndrome                                                                                                               | 0.592 | 0.183 |
| 224759_s_at  | C12orf23  | chromosome 12 open reading frame 23                                                                                                             | 0.550 | 0.183 |
| 201830_s_at  | NET1      | neuroepithelial cell transforming gene 1                                                                                                        | 0.442 | 0.183 |
| 205407_at    | RECK      | reversion-inducing-cysteine-rich protein with kazal motifs                                                                                      | 0.597 | 0.183 |
| 223774_at    | C1orf79   | chromosome 1 open reading frame 79                                                                                                              | 0.603 | 0.183 |
| 226718_at    | AMIGO1    | adhesion molecule with Ig-like domain 1                                                                                                         | 0.654 | 0.183 |
| 202950_at    | CRYZ      | crystallin, zeta (quinone reductase)                                                                                                            | 0.455 | 0.183 |
| 216863_s_at  | MORC2     | MORC family CW-type zinc finger 2                                                                                                               | 0.662 | 0.183 |
| 226800_at    | KIAA1799  | KIAA1799 protein                                                                                                                                | 0.533 | 0.183 |
| 238653_at    | ---       | CDNA FLJ43454 fis, clone OCBBF2034906                                                                                                           | 0.647 | 0.183 |
| 211478_s_at  | DPP4      | dipeptidyl-peptidase 4 (CD26, adenosine deaminase complexing protein 2)                                                                         | 0.620 | 0.183 |
| 223306_at    | EBPL      | emopamil binding protein-like                                                                                                                   | 0.607 | 0.183 |
| 225237_s_at  | MSI2      | musashi homolog 2 (Drosophila)                                                                                                                  | 0.664 | 0.183 |
| 223245_at    | STRBP     | spermatid perinuclear RNA binding protein                                                                                                       | 0.579 | 0.183 |
| 227585_at    | ---       | ---                                                                                                                                             | 0.574 | 0.183 |
| 217895_at    | PTCD3     | Pentatricopeptide repeat domain 3                                                                                                               | 0.612 | 0.183 |
| 204327_s_at  | ZNF202    | zinc finger protein 202                                                                                                                         | 0.652 | 0.183 |
| 220459_at    | MCM3APAS  | MCM3 minichromosome maintenance deficient 3 (S. cerevisiae) associated protein antisense                                                        | 0.611 | 0.183 |
| 243810_at    | LOC341333 | Similar to Heterogeneous nuclear ribonucleoprotein A1 (Helix-destabilizing protein) (Single-strand RNA-binding protein) (hnRNP core protein A1) | 0.558 | 0.183 |
| 229253_at    | THEM4     | thioesterase superfamily member 4                                                                                                               | 0.570 | 0.183 |

|              |                                        |                                                                                                                                  |       |       |
|--------------|----------------------------------------|----------------------------------------------------------------------------------------------------------------------------------|-------|-------|
| 1559957_a_at | LOC642852                              | hypothetical LOC642852                                                                                                           | 0.661 | 0.183 |
| 219342_at    | CASD1                                  | CAS1 domain containing 1                                                                                                         | 0.569 | 0.183 |
| 222931_s_at  | THNSL1                                 | threonine synthase-like 1 (bacterial)                                                                                            | 0.546 | 0.183 |
| 230003_at    | ---                                    | Transcribed locus                                                                                                                | 0.568 | 0.183 |
| 231124_x_at  | LY9                                    | lymphocyte antigen 9                                                                                                             | 0.666 | 0.183 |
| 223227_at    | BBS2                                   | Bardet-Biedl syndrome 2                                                                                                          | 0.659 | 0.183 |
| 221646_s_at  | ZDHHC11                                | zinc finger, DHHC-type containing 11                                                                                             | 0.518 | 0.183 |
| 220940_at    | KIAA1641                               | KIAA1641                                                                                                                         | 0.594 | 0.183 |
| 201188_s_at  | ITPR3                                  | inositol 1,4,5-triphosphate receptor, type 3                                                                                     | 0.635 | 0.183 |
| 227607_at    | STAMBPL1                               | STAM binding protein-like 1                                                                                                      | 0.618 | 0.183 |
| 1565436_s_at | MLL                                    | myeloid/lymphoid or mixed-lineage leukemia (trithorax homolog, Drosophila)                                                       | 0.571 | 0.183 |
| 233359_at    | ---                                    | CDNA clone IMAGE:5262617                                                                                                         | 0.663 | 0.183 |
| 215766_at    | GSTA1                                  | Glutathione S-transferase A1                                                                                                     | 0.662 | 0.183 |
| 236353_at    | ---                                    | CDNA FLJ43467 fis, clone OCBBF2036752                                                                                            | 0.547 | 0.183 |
| 244534_at    | PMPCB                                  | Peptidase (mitochondrial processing) beta                                                                                        | 0.615 | 0.183 |
| 239083_at    | ZNF786                                 | zinc finger protein 786                                                                                                          | 0.652 | 0.183 |
| 221648_s_at  | ---                                    | ---                                                                                                                              | 0.587 | 0.183 |
| 219922_s_at  | LTBP3                                  | latent transforming growth factor beta binding protein 3                                                                         | 0.605 | 0.183 |
| 229075_at    | ---                                    | Transcribed locus                                                                                                                | 0.645 | 0.183 |
| 235020_at    | TAF4B                                  | TAF4b RNA polymerase II, TATA box binding protein (TBP)-associated factor, 105kDa                                                | 0.622 | 0.183 |
| 221229_s_at  | FLJ20628                               | hypothetical protein FLJ20628 /// hypothetical protein FLJ20628                                                                  | 0.655 | 0.183 |
| 215985_at    | HCG8                                   | HLA complex group 8                                                                                                              | 0.579 | 0.183 |
| 228099_at    | ZNF550                                 | zinc finger protein 550                                                                                                          | 0.609 | 0.183 |
| 229064_s_at  | ---                                    | ---                                                                                                                              | 0.557 | 0.183 |
| 218573_at    | MAGEH1                                 | melanoma antigen family H, 1                                                                                                     | 0.655 | 0.183 |
| 202478_at    | TRIB2                                  | tribbles homolog 2 (Drosophila)                                                                                                  | 0.637 | 0.183 |
| 227037_at    | LOC201164                              | similar to CG12314 gene product                                                                                                  | 0.601 | 0.250 |
| 220485_s_at  | SIRPG                                  | signal-regulatory protein gamma                                                                                                  | 0.630 | 0.250 |
| 210116_at    | SH2D1A                                 | SH2 domain protein 1A, Duncan's disease (lymphoproliferative syndrome)                                                           | 0.520 | 0.250 |
| 205571_at    | LIPT1                                  | lipoyltransferase 1                                                                                                              | 0.610 | 0.250 |
| 223476_s_at  | FLJ38663                               | hypothetical protein FLJ38663                                                                                                    | 0.622 | 0.250 |
| 211623_s_at  | FBL                                    | fibrillarin /// fibrillarin                                                                                                      | 0.665 | 0.250 |
| 216902_s_at  | RRN3 ///<br>LOC653390 ///<br>LOC730092 | RRN3 RNA polymerase I transcription factor homolog (S. cerevisiae) /// hypothetical LOC653390 /// hypothetical protein LOC730092 | 0.606 | 0.250 |
| 224685_at    | MLLT4                                  | myeloid/lymphoid or mixed-lineage leukemia (trithorax homolog, Drosophila); translocated to, 4                                   | 0.421 | 0.250 |
| 235509_at    | C8orf38                                | chromosome 8 open reading frame 38                                                                                               | 0.598 | 0.250 |
| 235189_at    | NARG2                                  | NMDA receptor regulated 2                                                                                                        | 0.574 | 0.250 |
| 222448_s_at  | CMPK                                   | cytidylate kinase                                                                                                                | 0.663 | 0.250 |
| 225295_at    | SLC39A10                               | solute carrier family 39 (zinc transporter), member 10                                                                           | 0.640 | 0.250 |
| 212921_at    | SMYD2                                  | SET and MYND domain containing 2                                                                                                 | 0.655 | 0.250 |
| 232489_at    | CCDC76                                 | coiled-coil domain containing 76                                                                                                 | 0.624 | 0.250 |
| 237143_at    | ---                                    | Transcribed locus                                                                                                                | 0.563 | 0.250 |
| 231013_at    | ---                                    | ---                                                                                                                              | 0.428 | 0.250 |

|              |                        |                                                                                        |       |       |
|--------------|------------------------|----------------------------------------------------------------------------------------|-------|-------|
| 229728_at    | ---                    | ---                                                                                    | 0.649 | 0.250 |
| 240327_at    |                        | 6-Sep Septin 6                                                                         | 0.538 | 0.250 |
| 1558972_s_at | C6orf190               | chromosome 6 open reading frame 190                                                    | 0.560 | 0.250 |
| 217170_at    | ---                    | T-cell receptor active alpha-chain V-region (V-J-C) mRNA, partial cds, clone AA17      | 0.609 | 0.250 |
| 228020_at    | PTCD3                  | Pentatricopeptide repeat domain 3                                                      | 0.634 | 0.250 |
| 209302_at    | POLR2H                 | polymerase (RNA) II (DNA directed) polypeptide H                                       | 0.650 | 0.250 |
| 208939_at    | SEPHS1                 | selenophosphate synthetase 1                                                           | 0.664 | 0.250 |
| 220147_s_at  | FAM60A                 | family with sequence similarity 60, member A                                           | 0.659 | 0.250 |
| 215133_s_at  | LOC202134 /// NY-REN-7 | hypothetical protein LOC202134 /// NY-REN-7 antigen                                    | 0.493 | 0.250 |
| 227485_at    | DDX26B                 | DEAD/H (Asp-Glu-Ala-Asp/His) box polypeptide 26B                                       | 0.655 | 0.250 |
| 219864_s_at  | DSCR1L2                | Down syndrome critical region gene 1-like 2                                            | 0.595 | 0.250 |
| 209406_at    | BAG2                   | BCL2-associated athanogene 2                                                           | 0.452 | 0.250 |
| 201512_s_at  | TOMM70A                | translocase of outer mitochondrial membrane 70 homolog A ( <i>S. cerevisiae</i> )      | 0.645 | 0.250 |
| 227261_at    | KLF12                  | Kruppel-like factor 12                                                                 | 0.626 | 0.250 |
| 240102_at    | PRSS1                  | Protease, serine, 1 (trypsin 1)                                                        | 0.579 | 0.250 |
| 1553987_at   | C12orf47               | chromosome 12 open reading frame 47                                                    | 0.649 | 0.250 |
| 229636_at    | MPN2                   | marapsin 2                                                                             | 0.617 | 0.250 |
| 208925_at    | CLDND1                 | claudin domain containing 1                                                            | 0.626 | 0.250 |
| 205934_at    | PLCL1                  | phospholipase C-like 1                                                                 | 0.564 | 0.250 |
| 236583_at    | GIMAP5                 | GTPase, IMAP family member 5                                                           | 0.643 | 0.250 |
| 218757_s_at  | UPF3B                  | UPF3 regulator of nonsense transcripts homolog B (yeast)                               | 0.652 | 0.250 |
| 231283_at    | MGAT4A                 | mannosyl (alpha-1,3-)-glycoprotein beta-1,4-N-acetylglucosaminyltransferase, isozyme A | 0.654 | 0.250 |
| 214173_x_at  | C19orf2                | chromosome 19 open reading frame 2                                                     | 0.667 | 0.250 |
| 203288_at    | KIAA0355               | KIAA0355                                                                               | 0.643 | 0.250 |
| 229809_at    | ---                    | Transcribed locus                                                                      | 0.558 | 0.250 |
| 204791_at    | NR2C1                  | nuclear receptor subfamily 2, group C, member 1                                        | 0.644 | 0.250 |
| 202137_s_at  | ZMYND11                | zinc finger, MYND domain containing 11                                                 | 0.639 | 0.250 |
| 240339_at    | ANKRD23                | Ankyrin repeat domain 23                                                               | 0.659 | 0.250 |
| 219130_at    | CCDC76                 | coiled-coil domain containing 76                                                       | 0.544 | 0.250 |
| 233302_at    | BCL11B                 | B-cell CLL/lymphoma 11B (zinc finger protein)                                          | 0.625 | 0.250 |
| 221970_s_at  | NOL11                  | nucleolar protein 11                                                                   | 0.659 | 0.250 |
| 213483_at    | PPWD1                  | peptidylprolyl isomerase domain and WD repeat containing 1                             | 0.638 | 0.250 |
| 208051_s_at  | PAIP1                  | poly(A) binding protein interacting protein 1                                          | 0.609 | 0.250 |
| 221833_at    | LONP2                  | Lon peptidase 2, peroxisomal                                                           | 0.609 | 0.250 |
| 227471_at    | HACE1                  | HECT domain and ankyrin repeat containing, E3 ubiquitin protein ligase 1               | 0.605 | 0.250 |
| 213239_at    | C13orf24               | chromosome 13 open reading frame 24                                                    | 0.559 | 0.250 |
| 217147_s_at  | TRAT1                  | T cell receptor associated transmembrane adaptor 1                                     | 0.473 | 0.250 |
| 206914_at    | CRTAM                  | cytotoxic and regulatory T cell molecule                                               | 0.594 | 0.250 |
| 244665_at    | ITGA6                  | Integrin, alpha 6                                                                      | 0.601 | 0.250 |
| 220007_at    | METTL8                 | methyltransferase like 8                                                               | 0.625 | 0.250 |
| 213703_at    | LOC150759              | hypothetical protein LOC150759                                                         | 0.635 | 0.250 |
| 1555989_at   | ---                    | Transcribed locus                                                                      | 0.312 | 0.250 |
| 206666_at    | GZMK                   | granzyme K (granzyme 3; tryptase II) /// granzyme K (granzyme 3; tryptase II)          | 0.546 | 0.250 |
| 238057_at    | USP45                  | ubiquitin specific peptidase 45                                                        | 0.648 | 0.250 |

|              |           |                                                                                                                                             |       |       |
|--------------|-----------|---------------------------------------------------------------------------------------------------------------------------------------------|-------|-------|
| 215731_s_at  | MPHOSPH9  | M-phase phosphoprotein 9                                                                                                                    | 0.662 | 0.250 |
| 213689_x_at  | RPL5      | Ribosomal protein L5                                                                                                                        | 0.586 | 0.250 |
| 233005_at    | C1orf181  | Chromosome 1 open reading frame 181                                                                                                         | 0.521 | 0.250 |
| 210279_at    | GPR18     | G protein-coupled receptor 18                                                                                                               | 0.637 | 0.250 |
| 236032_at    | DNM1L     | Dynamamin 1-like                                                                                                                            | 0.595 | 0.250 |
| 207564_x_at  | OGT       | O-linked N-acetylglucosamine (GlcNAc) transferase (UDP-N-acetylglucosamine:polypeptide-N-acetylglucosaminyl transferase)                    | 0.659 | 0.250 |
| 225220_at    | SNORA24   | Small nucleolar RNA, H/ACA box 24                                                                                                           | 0.532 | 0.250 |
| 206114_at    | EPHA4     | EPH receptor A4                                                                                                                             | 0.561 | 0.250 |
| 221234_s_at  | BACH2     | BTB and CNC homology 1, basic leucine zipper transcription factor 2 /// BTB and CNC homology 1, basic leucine zipper transcription factor 2 | 0.612 | 0.250 |
| 1562412_at   | GPR89A    | G protein-coupled receptor 89A                                                                                                              | 0.648 | 0.250 |
| 205419_at    | EBI2      | Epstein-Barr virus induced gene 2 (lymphocyte-specific G protein-coupled receptor)                                                          | 0.604 | 0.250 |
| 227072_at    | RTTN      | rotatin                                                                                                                                     | 0.657 | 0.250 |
| 204083_s_at  | TPM2      | tropomyosin 2 (beta)                                                                                                                        | 0.571 | 0.250 |
| 206316_s_at  | KNTC1     | kinetochore associated 1                                                                                                                    | 0.657 | 0.250 |
| 225792_at    | HOOK1     | hook homolog 1 (Drosophila)                                                                                                                 | 0.590 | 0.250 |
| 234192_s_at  | GKAP1     | G kinase anchoring protein 1                                                                                                                | 0.661 | 0.250 |
| 236198_at    | ---       | Transcribed locus                                                                                                                           | 0.614 | 0.250 |
| 209902_at    | ATR ///   | ataxia telangiectasia and Rad3 related ///                                                                                                  | 0.651 | 0.250 |
|              | LOC648152 | ataxia telangiectasia and Rad3 related protein                                                                                              |       |       |
| 208663_s_at  | TTC3      | tetratricopeptide repeat domain 3                                                                                                           | 0.617 | 0.250 |
| 201456_s_at  | BUB3      | BUB3 budding uninhibited by benzimidazoles 3 homolog (yeast)                                                                                | 0.661 | 0.250 |
| 206241_at    | KPNA5     | karyopherin alpha 5 (importin alpha 6)                                                                                                      | 0.524 | 0.250 |
| 213093_at    | PRKCA     | protein kinase C, alpha                                                                                                                     | 0.595 | 0.250 |
| 1554029_a_at | KIAA0372  | KIAA0372                                                                                                                                    | 0.459 | 0.250 |
| 212215_at    | PREPL     | prolyl endopeptidase-like                                                                                                                   | 0.635 | 0.250 |
| 203428_s_at  | ASF1A     | ASF1 anti-silencing function 1 homolog A (S. cerevisiae)                                                                                    | 0.610 | 0.250 |
| 222624_s_at  | ZNF639    | zinc finger protein 639                                                                                                                     | 0.577 | 0.250 |
| 226041_at    | NAPE-PLD  | N-acyl-phosphatidylethanolamine-hydrolyzing phospholipase D                                                                                 | 0.625 | 0.250 |
| 214723_x_at  | KIAA1641  | KIAA1641                                                                                                                                    | 0.627 | 0.250 |
| 201829_at    | NET1      | neuroepithelial cell transforming gene 1                                                                                                    | 0.599 | 0.250 |
| 212731_at    | ANKRD46   | ankyrin repeat domain 46                                                                                                                    | 0.572 | 0.250 |
| 223671_x_at  | DPH5      | DPH5 homolog (S. cerevisiae)                                                                                                                | 0.597 | 0.250 |
| 226352_at    | JMY       | Junction-mediating and regulatory protein                                                                                                   | 0.635 | 0.250 |
| 223319_at    | GPHN      | gephyrin                                                                                                                                    | 0.589 | 0.250 |
| 221685_s_at  | CCDC99    | coiled-coil domain containing 99                                                                                                            | 0.647 | 0.250 |
| 243016_at    | TYMS      | Thymidylate synthetase                                                                                                                      | 0.651 | 0.250 |
| 230815_at    | LOC389765 | similar to KIF27C                                                                                                                           | 0.662 | 0.250 |
| 213623_at    | KIF3A     | kinesin family member 3A                                                                                                                    | 0.579 | 0.250 |
| 212170_at    | RBM12     | RNA binding motif protein 12                                                                                                                | 0.661 | 0.250 |
| 229325_at    | ZZZ3      | zinc finger, ZZ-type containing 3                                                                                                           | 0.579 | 0.250 |
| 208661_s_at  | TTC3      | tetratricopeptide repeat domain 3                                                                                                           | 0.640 | 0.250 |
| 204143_s_at  | ENOSF1    | enolase superfamily member 1                                                                                                                | 0.640 | 0.250 |
| 202747_s_at  | ITM2A     | integral membrane protein 2A                                                                                                                | 0.654 | 0.250 |
| 1557684_at   | ZNF286    | zinc finger protein 286                                                                                                                     | 0.615 | 0.250 |

|              |           |                                                                         |       |       |
|--------------|-----------|-------------------------------------------------------------------------|-------|-------|
| 226361_at    | TMEM42    | transmembrane protein 42                                                | 0.644 | 0.250 |
| 232194_at    | METTL4    | methyltransferase like 4                                                | 0.640 | 0.250 |
| 230764_at    | C9orf5    | Chromosome 9 open reading frame 5                                       | 0.663 | 0.250 |
| 212893_at    | ZZZ3      | zinc finger, ZZ-type containing 3                                       | 0.589 | 0.250 |
| 224060_s_at  | DPH5      | DPH5 homolog (S. cerevisiae)                                            | 0.539 | 0.250 |
| 208662_s_at  | TTC3      | tetratricopeptide repeat domain 3                                       | 0.653 | 0.250 |
| 233884_at    | ---       | Homo sapiens, clone IMAGE:5180231, mRNA                                 | 0.615 | 0.250 |
| 227409_at    | PPP1R3E   | protein phosphatase 1, regulatory (inhibitor) subunit 3E                | 0.611 | 0.250 |
| 212452_x_at  | MYST4     | MYST histone acetyltransferase (monocytic leukemia) 4                   | 0.638 | 0.250 |
| 205005_s_at  | NMT2      | N-myristoyltransferase 2                                                | 0.611 | 0.250 |
| 213005_s_at  | ANKRD15   | ankyrin repeat domain 15                                                | 0.369 | 0.250 |
| 225409_at    | MGC52110  | hypothetical protein MGC52110                                           | 0.664 | 0.250 |
| 204992_s_at  | PFN2      | profilin 2                                                              | 0.618 | 0.250 |
| 243764_at    | VSIG1     | V-set and immunoglobulin domain containing 1                            | 0.617 | 0.250 |
| 207651_at    | GPR171    | G protein-coupled receptor 171                                          | 0.624 | 0.250 |
| 235912_at    | FAM62B    | Family with sequence similarity 62 (C2 domain containing) member B      | 0.657 | 0.250 |
| 209267_s_at  | SLC39A8   | solute carrier family 39 (zinc transporter), member 8                   | 0.604 | 0.250 |
| 235611_at    | ---       | ---                                                                     | 0.661 | 0.250 |
| 243362_s_at  | LOC641518 | hypothetical protein LOC641518                                          | 0.537 | 0.250 |
| 241038_at    | CHRM3     | Cholinergic receptor, muscarinic 3                                      | 0.604 | 0.250 |
| 1557078_at   | SLFN5     | schlafen family member 5                                                | 0.576 | 0.250 |
| 228282_at    | MGC33302  | Hypothetical protein MGC33302                                           | 0.647 | 0.250 |
| 224968_at    | CCDC104   | coiled-coil domain containing 104                                       | 0.599 | 0.250 |
| 222623_s_at  | ZNF639    | zinc finger protein 639                                                 | 0.622 | 0.250 |
| 237953_at    | DPP4      | Dipeptidyl-peptidase 4 (CD26, adenosine deaminase complexing protein 2) | 0.520 | 0.250 |
| 222736_s_at  | TMEM38B   | transmembrane protein 38B                                               | 0.611 | 0.250 |
| 238907_at    | ZNF780A   | Zinc finger protein 780A                                                | 0.643 | 0.250 |
| 213063_at    | ZC3H14    | zinc finger CCCH-type containing 14                                     | 0.640 | 0.250 |
| 228948_at    | EPHA4     | EPH receptor A4                                                         | 0.516 | 0.250 |
| 227722_at    | RPS23     | ribosomal protein S23                                                   | 0.565 | 0.250 |
| 244679_at    | STK38     | Serine/threonine kinase 38                                              | 0.648 | 0.250 |
| 217936_at    | ARHGAP5   | Rho GTPase activating protein 5                                         | 0.546 | 0.250 |
| 229327_s_at  | ---       | Transcribed locus                                                       | 0.558 | 0.250 |
| 228561_at    | CDC37L1   | cell division cycle 37 homolog (S. cerevisiae)-like 1                   | 0.548 | 0.250 |
| 214086_s_at  | PARP2     | poly (ADP-ribose) polymerase family, member 2                           | 0.639 | 0.250 |
| 1562731_s_at | MDS2      | myelodysplastic syndrome 2 translocation associated                     | 0.514 | 0.250 |
| 239673_at    | NR3C2     | Nuclear receptor subfamily 3, group C, member 2                         | 0.618 | 0.250 |
| 209064_x_at  | PAIP1     | poly(A) binding protein interacting protein 1                           | 0.610 | 0.250 |
| 226444_at    | SLC39A10  | Solute carrier family 39 (zinc transporter), member 10                  | 0.633 | 0.250 |
| 212196_at    | IL6ST     | Interleukin 6 signal transducer (gp130, oncostatin M receptor)          | 0.637 | 0.250 |
| 208798_x_at  | GOLGA8A   | golgi autoantigen, golgin subfamily a, 8A                               | 0.653 | 0.250 |
| 213376_at    | ZBTB1     | zinc finger and BTB domain containing 1                                 | 0.658 | 0.250 |
| 240572_s_at  | LOC374443 | CLR pseudogene                                                          | 0.644 | 0.250 |
| 230399_at    | ---       | Transcribed locus                                                       | 0.659 | 0.250 |
| 227606_s_at  | STAMBPL1  | STAM binding protein-like 1                                             | 0.593 | 0.250 |

## Supplementary table 2

## Downregulated transcripts

|              |                            |                                                                                                  |       |       |
|--------------|----------------------------|--------------------------------------------------------------------------------------------------|-------|-------|
| 212637_s_at  | WWP1                       | WW domain containing E3 ubiquitin protein ligase 1                                               | 0.638 | 0.250 |
| 205176_s_at  | ITGB3BP                    | integrin beta 3 binding protein (beta3-endonexin)                                                | 0.604 | 0.250 |
| 225619_at    | SLAIN1                     | SLAIN motif family, member 1                                                                     | 0.623 | 0.250 |
| 218948_at    | QRSL1                      | glutaminyl-tRNA synthase (glutamine-hydrolyzing)-like 1                                          | 0.540 | 0.250 |
| 235414_at    | ZNF383                     | zinc finger protein 383                                                                          | 0.619 | 0.250 |
| 213701_at    | C12orf29                   | chromosome 12 open reading frame 29                                                              | 0.587 | 0.250 |
| 217911_s_at  | BAG3                       | BCL2-associated athanogene 3                                                                     | 0.566 | 0.250 |
| 221564_at    | PRMT2                      | protein arginine methyltransferase 2                                                             | 0.636 | 0.250 |
| 234849_at    | TRA@                       | T cell receptor alpha locus                                                                      | 0.610 | 0.250 |
| 240394_at    | ---                        | Transcribed locus                                                                                | 0.534 | 0.250 |
| 242539_at    | LOC730069 ///<br>LOC731484 | similar to nuclear receptor binding factor 2 /// similar to<br>nuclear receptor binding factor 2 | 0.590 | 0.250 |
| 230075_at    | RAB39B                     | RAB39B, member RAS oncogene family                                                               | 0.640 | 0.250 |
| 239479_x_at  | CHRM3                      | Cholinergic receptor, muscarinic 3                                                               | 0.580 | 0.250 |
| 203492_x_at  | CEP57                      | centrosomal protein 57kDa                                                                        | 0.641 | 0.250 |
| 203972_s_at  | PEX3                       | peroxisomal biogenesis factor 3                                                                  | 0.621 | 0.250 |
| 226587_at    | ---                        | CDNA FLJ33569 fis, clone BRAMY2010317                                                            | 0.633 | 0.250 |
| 1565830_at   | ---                        | MRNA; cDNA DKFZp686D0673 (from clone<br>DKFZp686D0673)                                           | 0.634 | 0.250 |
| 228736_at    | HEL308                     | DNA helicase HEL308                                                                              | 0.658 | 0.250 |
| 228345_at    | ---                        | ---                                                                                              | 0.600 | 0.250 |
| 1558250_s_at | ---                        | CDNA FLJ40891 fis, clone UTERU2001110                                                            | 0.603 | 0.250 |
| 228334_x_at  | KIAA1712                   | KIAA1712                                                                                         | 0.645 | 0.250 |
| 1554089_s_at | SBDS ///<br>SBDSP          | Shwachman-Bodian-Diamond syndrome /// Shwachman-<br>Bodian-Diamond syndrome pseudogene           | 0.616 | 0.250 |
| 204777_s_at  | MAL                        | mal, T-cell differentiation protein                                                              | 0.617 | 0.250 |
| 226925_at    | ACPL2                      | acid phosphatase-like 2                                                                          | 0.575 | 0.250 |
| 242761_s_at  | ZNF420                     | zinc finger protein 420                                                                          | 0.615 | 0.250 |
| 216069_at    | PRMT2                      | Protein arginine methyltransferase 2                                                             | 0.628 | 0.250 |
| 1558971_at   | C6orf190                   | chromosome 6 open reading frame 190                                                              | 0.568 | 0.250 |
| 212614_at    | ARID5B                     | AT rich interactive domain 5B (MRF1-like)                                                        | 0.662 | 0.250 |
| 225805_at    | HNRPU                      | heterogeneous nuclear ribonucleoprotein U (scaffold<br>attachment factor A)                      | 0.655 | 0.250 |
| 243999_at    | SLFN5                      | schlafen family member 5                                                                         | 0.591 | 0.250 |
| 226030_at    | ACADSB                     | acyl-Coenzyme A dehydrogenase, short/branched chain                                              | 0.610 | 0.250 |
| 230793_at    | LRRC16                     | leucine rich repeat containing 16                                                                | 0.543 | 0.250 |
| 225328_at    | ---                        | CDNA FLJ39585 fis, clone SKMUS2006633                                                            | 0.486 | 0.250 |
| 228129_at    | SERBP1                     | SERPINE1 mRNA binding protein 1                                                                  | 0.615 | 0.250 |
| 211861_x_at  | CD28                       | CD28 molecule                                                                                    | 0.534 | 0.250 |
| 201872_s_at  | ABCE1                      | ATP-binding cassette, sub-family E (OABP), member 1                                              | 0.652 | 0.250 |
| 227182_at    | SUSD3                      | sushi domain containing 3                                                                        | 0.630 | 0.250 |
| 212217_at    | PREPL                      | prolyl endopeptidase-like                                                                        | 0.631 | 0.250 |
| 203642_s_at  | COBL1                      | COBL-like 1                                                                                      | 0.657 | 0.250 |
| 1552519_at   | ACVR1C                     | activin A receptor, type IC                                                                      | 0.483 | 0.250 |
| 206181_at    | SLAMF1                     | signaling lymphocytic activation molecule family<br>member 1                                     | 0.576 | 0.250 |
| 227022_at    | GNPDA2                     | glucosamine-6-phosphate deaminase 2                                                              | 0.538 | 0.250 |

## Supplementary table 2

## Downregulated transcripts

|              |                          |                                                                                                         |       |       |
|--------------|--------------------------|---------------------------------------------------------------------------------------------------------|-------|-------|
| 235048_at    | KIAA0888                 | KIAA0888 protein                                                                                        | 0.538 | 0.250 |
| 39248_at     | AQP3                     | aquaporin 3 (Gill blood group)                                                                          | 0.648 | 0.250 |
| 218477_at    | TMEM14A                  | transmembrane protein 14A                                                                               | 0.607 | 0.250 |
| 239591_at    | ---                      | Transcribed locus                                                                                       | 0.271 | 0.250 |
| 225543_at    | GTF3C4                   | General transcription factor IIIC, polypeptide 4, 90kDa                                                 | 0.664 | 0.250 |
| 226977_at    | LOC492311                | similar to bovine IgA regulatory protein                                                                | 0.606 | 0.250 |
| 219700_at    | PLXDC1                   | plexin domain containing 1                                                                              | 0.622 | 0.250 |
| 225155_at    | SNHG5                    | small nucleolar RNA host gene (non-protein coding) 5                                                    | 0.600 | 0.250 |
| 1555325_s_at | ZNF26                    | zinc finger protein 26                                                                                  | 0.612 | 0.250 |
| 205758_at    | CD8A                     | CD8a molecule /// CD8a molecule                                                                         | 0.620 | 0.250 |
| 230056_at    | BPTF                     | bromodomain PHD finger transcription factor                                                             | 0.608 | 0.250 |
| 238695_s_at  | RAB39B                   | RAB39B, member RAS oncogene family                                                                      | 0.609 | 0.250 |
| 229371_at    | SLC20A2                  | Solute carrier family 20 (phosphate transporter), member 2                                              | 0.636 | 0.250 |
| 1556451_at   | BACH2                    | BTB and CNC homology 1, basic leucine zipper transcription factor 2                                     | 0.619 | 0.250 |
| 202722_s_at  | GFPT1                    | glutamine-fructose-6-phosphate transaminase 1                                                           | 0.588 | 0.250 |
| 228122_at    | CCDC66                   | coiled-coil domain containing 66                                                                        | 0.622 | 0.250 |
| 1564424_at   | FAM62B                   | Family with sequence similarity 62 (C2 domain containing) member B                                      | 0.627 | 0.250 |
| 217777_s_at  | PTPLAD1 ///<br>LOC732402 | protein tyrosine phosphatase-like A domain containing 1<br>/// similar to butyrate-induced transcript 1 | 0.613 | 0.250 |
| 205053_at    | PRIM1                    | primase, polypeptide 1, 49kDa                                                                           | 0.582 | 0.250 |
| 201922_at    | TINP1                    | TGF beta-inducible nuclear protein 1                                                                    | 0.644 | 0.250 |
| 204401_at    | KCNN4                    | potassium intermediate/small conductance calcium-activated channel, subfamily N, member 4               | 0.665 | 0.250 |
| 209434_s_at  | PPAT                     | phosphoribosyl pyrophosphate amidotransferase                                                           | 0.611 | 0.250 |
| 207904_s_at  | LNPEP                    | leucyl/cystinyl aminopeptidase                                                                          | 0.641 | 0.250 |
| 206958_s_at  | UPF3A                    | UPF3 regulator of nonsense transcripts homolog A (yeast)                                                | 0.635 | 0.250 |
| 228661_s_at  | ---                      | CDNA FLJ11489 fis, clone HEMBA1001915                                                                   | 0.589 | 0.250 |
| 225400_at    | C1orf19                  | chromosome 1 open reading frame 19                                                                      | 0.644 | 0.250 |
| 226605_at    | DGKQ                     | diacylglycerol kinase, theta 110kDa                                                                     | 0.635 | 0.250 |
| 219355_at    | CXorf57                  | chromosome X open reading frame 57                                                                      | 0.551 | 0.250 |
| 212249_at    | PIK3R1                   | phosphoinositide-3-kinase, regulatory subunit 1 (p85 alpha)                                             | 0.626 | 0.250 |
| 220882_at    | ---                      | ---                                                                                                     | 0.632 | 0.250 |
| 226807_at    | ZFP1                     | zinc finger protein 1 homolog (mouse)                                                                   | 0.623 | 0.250 |
| 225698_at    | C5orf26                  | chromosome 5 open reading frame 26                                                                      | 0.660 | 0.250 |
| 211563_s_at  | C19orf2                  | chromosome 19 open reading frame 2                                                                      | 0.631 | 0.250 |
| 227172_at    | TMEM116                  | transmembrane protein 116                                                                               | 0.627 | 0.250 |
| 203427_at    | ASF1A                    | ASF1 anti-silencing function 1 homolog A (S. cerevisiae)                                                | 0.625 | 0.250 |
| 1558700_s_at | ZNF260                   | zinc finger protein 260                                                                                 | 0.663 | 0.250 |
| 243176_at    | ---                      | CDNA FLJ30090 fis, clone BNGH41000015                                                                   | 0.637 | 0.341 |
| 243602_at    | MGC40069                 | Hypothetical protein MGC40069                                                                           | 0.578 | 0.341 |
| 209849_s_at  | RAD51C                   | RAD51 homolog C (S. cerevisiae)                                                                         | 0.625 | 0.341 |
| 1554667_s_at | METTL8                   | methyltransferase like 8                                                                                | 0.666 | 0.341 |
| 1569482_at   | ---                      | CDNA clone IMAGE:5262617                                                                                | 0.627 | 0.341 |

|              |                  |                                                                                                                             |       |       |
|--------------|------------------|-----------------------------------------------------------------------------------------------------------------------------|-------|-------|
| 226886_at    | ---              | Clone 114 tumor rejection antigen                                                                                           | 0.636 | 0.341 |
| 226528_at    | MTX3             | metaxin 3                                                                                                                   | 0.643 | 0.341 |
| 205976_at    | FASTKD2          | FAST kinase domains 2                                                                                                       | 0.597 | 0.341 |
| 214482_at    | ZBTB25           | zinc finger and BTB domain containing 25                                                                                    | 0.564 | 0.341 |
| 243791_at    | ---              | Transcribed locus                                                                                                           | 0.606 | 0.341 |
| 226784_at    | TWISTNB          | TWIST neighbor                                                                                                              | 0.626 | 0.341 |
| 203367_at    | DUSP14           | dual specificity phosphatase 14                                                                                             | 0.664 | 0.341 |
| 1557555_at   | MAD1L1           | MAD1 mitotic arrest deficient-like 1 (yeast)                                                                                | 0.592 | 0.341 |
| 206255_at    | BLK              | B lymphoid tyrosine kinase                                                                                                  | 0.505 | 0.341 |
| 204023_at    | RFC4             | replication factor C (activator 1) 4, 37kDa                                                                                 | 0.585 | 0.341 |
| 1555793_a_at | ZNF545           | zinc finger protein 545                                                                                                     | 0.646 | 0.341 |
| 203543_s_at  | KLF9             | Kruppel-like factor 9                                                                                                       | 0.600 | 0.341 |
| 224367_at    | BEX2             | brain expressed X-linked 2 /// brain expressed X-linked 2                                                                   | 0.528 | 0.341 |
| 209862_s_at  | CEP57            | centrosomal protein 57kDa                                                                                                   | 0.597 | 0.341 |
| 236856_x_at  | ---              | CDNA FLJ34374 fis, clone FEBRA2017502                                                                                       | 0.609 | 0.341 |
| 200841_s_at  | EPRS             | glutamyl-prolyl-tRNA synthetase                                                                                             | 0.640 | 0.341 |
| 206613_s_at  | TAF1A            | TATA box binding protein (TBP)-associated factor, RNA polymerase I, A, 48kDa                                                | 0.613 | 0.341 |
| 1555964_at   | ARL17P1          | ADP-ribosylation factor-like 17 pseudogene 1                                                                                | 0.607 | 0.341 |
| 238451_at    | MPP7             | membrane protein, palmitoylated 7 (MAGUK p55 subfamily member 7)                                                            | 0.610 | 0.341 |
| 215592_at    | ---              | CDNA FLJ12232 fis, clone MAMMA1001206                                                                                       | 0.635 | 0.341 |
| 227082_at    | ---              | MRNA; cDNA DKFZp586K1922 (from clone DKFZp586K1922)                                                                         | 0.614 | 0.341 |
| 225864_at    | FAM84B           | family with sequence similarity 84, member B                                                                                | 0.559 | 0.341 |
| 219600_s_at  | TMEM50B          | transmembrane protein 50B                                                                                                   | 0.629 | 0.341 |
| 1564776_at   | LENG10           | leukocyte receptor cluster (LRC) member 10                                                                                  | 0.442 | 0.341 |
| 229119_s_at  | ACTB ///<br>SWS1 | actin, beta /// SWIM-domain containing Srs2 interacting protein 1                                                           | 0.633 | 0.341 |
| 222629_at    | REV1             | REV1 homolog (S. cerevisiae)                                                                                                | 0.667 | 0.341 |
| 206804_at    | CD3G             | CD3g molecule, gamma (CD3-TCR complex)                                                                                      | 0.627 | 0.341 |
| 227291_s_at  | BOLA3            | bolA homolog 3 (E. coli)                                                                                                    | 0.659 | 0.341 |
| 243626_at    | ---              | Transcribed locus, moderately similar to XP_944674.2 similar to alpha 3 type VI collagen isoform 1 precursor [Homo sapiens] | 0.552 | 0.341 |
| 231530_s_at  | C11orf1          | chromosome 11 open reading frame 1                                                                                          | 0.548 | 0.341 |
| 1565895_at   | ---              | Transcribed locus                                                                                                           | 0.662 | 0.341 |
| 225359_at    | DNAJC19          | DnaJ (Hsp40) homolog, subfamily C, member 19                                                                                | 0.663 | 0.341 |
| 236301_at    | ---              | Full length insert cDNA clone YY82H04                                                                                       | 0.658 | 0.341 |
| 212851_at    | DCUN1D4          | DCN1, defective in cullin neddylation 1, domain containing 4 (S. cerevisiae)                                                | 0.609 | 0.341 |
| 243546_at    | SESN3            | Sestrin 3                                                                                                                   | 0.579 | 0.341 |
| 217394_at    | TRA@             | T cell receptor alpha locus                                                                                                 | 0.649 | 0.341 |
| 213539_at    | CD3D             | CD3d molecule, delta (CD3-TCR complex)                                                                                      | 0.574 | 0.341 |
| 225595_at    | CREBZF           | CREB/ATF bZIP transcription factor                                                                                          | 0.643 | 0.341 |
| 221935_s_at  | C3orf64          | chromosome 3 open reading frame 64                                                                                          | 0.632 | 0.341 |
| 205599_at    | TRAF1            | TNF receptor-associated factor 1                                                                                            | 0.647 | 0.341 |
| 223096_at    | NOP5/NOP58       | nucleolar protein NOP5/NOP58                                                                                                | 0.665 | 0.341 |
| 213983_s_at  | SCC-112          | SCC-112 protein                                                                                                             | 0.645 | 0.341 |
| 219133_at    | OXSM             | 3-oxoacyl-ACP synthase, mitochondrial                                                                                       | 0.615 | 0.341 |

|              |                            |                                                                                                                                    |       |       |
|--------------|----------------------------|------------------------------------------------------------------------------------------------------------------------------------|-------|-------|
| 236796_at    | BACH2                      | BTB and CNC homology 1, basic leucine zipper transcription factor 2                                                                | 0.655 | 0.341 |
| 206734_at    | JRKL                       | jerky homolog-like (mouse)                                                                                                         | 0.630 | 0.341 |
| 238635_at    | C5orf28                    | chromosome 5 open reading frame 28                                                                                                 | 0.660 | 0.341 |
| 220797_at    | METT10D                    | methyltransferase 10 domain containing                                                                                             | 0.649 | 0.341 |
| 222785_x_at  | C11orf1                    | chromosome 11 open reading frame 1                                                                                                 | 0.576 | 0.341 |
| 205590_at    | RASGRP1                    | RAS guanyl releasing protein 1 (calcium and DAG-regulated)                                                                         | 0.641 | 0.341 |
| 202020_s_at  | LANCL1                     | LanC lantibiotic synthetase component C-like 1 (bacterial)                                                                         | 0.647 | 0.341 |
| 227393_at    | TMEM16J                    | transmembrane protein 16J                                                                                                          | 0.665 | 0.341 |
| 218706_s_at  | GRAMD3                     | GRAM domain containing 3                                                                                                           | 0.655 | 0.341 |
| 200685_at    | SFRS11                     | splicing factor, arginine/serine-rich 11                                                                                           | 0.621 | 0.341 |
| 1558517_s_at | LRRRC8C                    | Leucine rich repeat containing 8 family, member C                                                                                  | 0.658 | 0.341 |
| 213534_s_at  | PASK                       | PAS domain containing serine/threonine kinase                                                                                      | 0.608 | 0.341 |
| 228909_at    | C21orf86                   | Chromosome 21 open reading frame 86                                                                                                | 0.523 | 0.341 |
| 1556462_a_at | LOC730245                  | Hypothetical protein LOC730245                                                                                                     | 0.563 | 0.341 |
| 222819_at    | CTPS2                      | CTP synthase II                                                                                                                    | 0.650 | 0.341 |
| 226247_at    | PLEKHA1                    | pleckstrin homology domain containing, family A (phosphoinositide binding specific) member 1                                       | 0.644 | 0.341 |
| 230300_at    | ---                        | CDNA FLJ42315 fis, clone TRACH2019661                                                                                              | 0.612 | 0.341 |
| 202265_at    | BMI1                       | B lymphoma Mo-MLV insertion region (mouse)                                                                                         | 0.631 | 0.341 |
| 223093_at    | ANKH                       | ankylosis, progressive homolog (mouse)                                                                                             | 0.631 | 0.341 |
| 215708_s_at  | PRIM2A                     | primase, polypeptide 2A, 58kDa                                                                                                     | 0.627 | 0.341 |
| 238692_at    | BTBD11                     | BTB (POZ) domain containing 11                                                                                                     | 0.565 | 0.341 |
| 219869_s_at  | SLC39A8                    | solute carrier family 39 (zinc transporter), member 8                                                                              | 0.621 | 0.341 |
| 214823_at    | ZNF204                     | zinc finger protein 204                                                                                                            | 0.412 | 0.341 |
| 205041_s_at  | ORM1 ///<br>ORM2           | orosomuroid 1 /// orosomuroid 2                                                                                                    | 0.426 | 0.341 |
| 209889_at    | SEC31B                     | SEC31 homolog B ( <i>S. cerevisiae</i> )                                                                                           | 0.648 | 0.341 |
| 229323_at    | LOC387723 ///<br>LOC651940 | hypothetical LOC387723 /// hypothetical protein<br>LOC651940                                                                       | 0.625 | 0.341 |
| 221897_at    | TRIM52                     | tripartite motif-containing 52                                                                                                     | 0.650 | 0.341 |
| 207057_at    | SLC16A7                    | solute carrier family 16, member 7 (monocarboxylic acid transporter 2)                                                             | 0.627 | 0.341 |
| 214662_at    | WDR43                      | WD repeat domain 43                                                                                                                | 0.652 | 0.341 |
| 243492_at    | THEM4                      | Thioesterase superfamily member 4                                                                                                  | 0.631 | 0.341 |
| 216044_x_at  | FAM69A                     | family with sequence similarity 69, member A                                                                                       | 0.637 | 0.341 |
| 1561181_at   | ARID5B                     | AT rich interactive domain 5B (MRF1-like)                                                                                          | 0.625 | 0.341 |
| 228680_at    | KIF3A                      | kinesin family member 3A                                                                                                           | 0.651 | 0.341 |
| 220121_at    | LINS1                      | lines homolog 1 ( <i>Drosophila</i> )                                                                                              | 0.634 | 0.341 |
| 220606_s_at  | C17orf48                   | chromosome 17 open reading frame 48                                                                                                | 0.641 | 0.341 |
| 228920_at    | ZNF260                     | zinc finger protein 260                                                                                                            | 0.642 | 0.341 |
| 221618_s_at  | TAF9B ///<br>LOC728198     | TAF9B RNA polymerase II, TATA box binding protein (TBP)-associated factor, 31kDa /// similar to transcription associated factor 9B | 0.516 | 0.341 |
| 211423_s_at  | SC5DL                      | sterol-C5-desaturase (ERG3 delta-5-desaturase homolog, fungal)-like                                                                | 0.576 | 0.341 |
| 235172_at    | GABPB2                     | GA binding protein transcription factor, beta subunit 2                                                                            | 0.537 | 0.341 |

|              |                         |                                                                                                                                                  |       |       |
|--------------|-------------------------|--------------------------------------------------------------------------------------------------------------------------------------------------|-------|-------|
| 234427_at    | TRA@                    | T cell receptor alpha locus /// T cell receptor alpha chain (TRCAV2S1-N-AJ41-C) mRNA, anti-melanoma cytotoxic T lymphocyte clone MU-45, -63, -79 | 0.442 | 0.341 |
| 224365_s_at  | TIGD7                   | tigger transposable element derived 7 /// tigger transposable element derived 7                                                                  | 0.629 | 0.341 |
| 210612_s_at  | SYNJ2                   | synaptojanin 2                                                                                                                                   | 0.493 | 0.341 |
| 1569110_x_at | LOC728613               | programmed cell death protein 6-like                                                                                                             | 0.645 | 0.341 |
| 239317_at    | ---                     | ---                                                                                                                                              | 0.615 | 0.341 |
| 1554208_at   | RP5-821D11.2            | meiosis defective 1                                                                                                                              | 0.633 | 0.341 |
| 239147_at    | ARSK                    | arylsulfatase family, member K                                                                                                                   | 0.617 | 0.341 |
| 239482_x_at  | ZNF708                  | Zinc finger protein 708                                                                                                                          | 0.636 | 0.341 |
| 221973_at    | ---                     | CDNA clone IMAGE:5217021, with apparent retained intron                                                                                          | 0.656 | 0.341 |
| 203970_s_at  | PEX3                    | peroxisomal biogenesis factor 3                                                                                                                  | 0.610 | 0.341 |
| 215175_at    | PCNX                    | pecanex homolog (Drosophila)                                                                                                                     | 0.632 | 0.341 |
| 222735_at    | ---                     | ---                                                                                                                                              | 0.649 | 0.341 |
| 202979_s_at  | CREBZF                  | CREB/ATF bZIP transcription factor                                                                                                               | 0.643 | 0.341 |
| 212096_s_at  | MTUS1                   | mitochondrial tumor suppressor 1                                                                                                                 | 0.513 | 0.341 |
| 208602_x_at  | CD6                     | CD6 molecule                                                                                                                                     | 0.661 | 0.341 |
| 241699_at    | RY1                     | Putative nucleic acid binding protein RY-1                                                                                                       | 0.651 | 0.341 |
| 205321_at    | EIF2S3                  | eukaryotic translation initiation factor 2, subunit 3 gamma, 52kDa                                                                               | 0.568 | 0.341 |
| 220553_s_at  | TAF13 /// PRPF39        | TAF13 RNA polymerase II, TATA box binding protein (TBP)-associated factor, 18kDa /// PRP39 pre-mRNA processing factor 39 homolog (S. cerevisiae) | 0.632 | 0.341 |
| 203493_s_at  | CEP57                   | centrosomal protein 57kDa                                                                                                                        | 0.626 | 0.341 |
| 220132_s_at  | CLEC2D                  | C-type lectin domain family 2, member D                                                                                                          | 0.635 | 0.341 |
| 213528_at    | C1orf156                | chromosome 1 open reading frame 156                                                                                                              | 0.594 | 0.341 |
| 1568680_s_at | YTHDC2                  | YTH domain containing 2                                                                                                                          | 0.638 | 0.341 |
| 209602_s_at  | GATA3                   | GATA binding protein 3                                                                                                                           | 0.622 | 0.341 |
| 218984_at    | PUS7                    | pseudouridylate synthase 7 homolog (S. cerevisiae)                                                                                               | 0.652 | 0.341 |
| 222579_at    | UBE1DC1                 | ubiquitin-activating enzyme E1-domain containing 1                                                                                               | 0.595 | 0.341 |
| 234402_at    | TRA@                    | T cell receptor alpha locus /// T-cell receptor active alpha-chain V-region (V-J-C) mRNA, partial cds, clone AE212                               | 0.638 | 0.341 |
| 229428_at    | PARG                    | Poly (ADP-ribose) glycohydrolase                                                                                                                 | 0.624 | 0.341 |
| 205288_at    | CDC14A                  | CDC14 cell division cycle 14 homolog A (S. cerevisiae)                                                                                           | 0.632 | 0.341 |
| 228518_at    | IGH@ /// IGHG1 /// IGHM | immunoglobulin heavy locus /// immunoglobulin heavy constant gamma 1 (G1m marker) /// immunoglobulin heavy constant mu                           | 0.581 | 0.341 |
| 214831_at    | ELK4                    | ELK4, ETS-domain protein (SRF accessory protein 1)                                                                                               | 0.666 | 0.341 |
| 1558956_s_at | IFT80                   | intraflagellar transport 80 homolog (Chlamydomonas)                                                                                              | 0.654 | 0.341 |
| 235036_at    | LIX1L                   | Lix1 homolog (mouse)-like                                                                                                                        | 0.639 | 0.341 |
| 203803_at    | PCYOX1                  | prenylcysteine oxidase 1                                                                                                                         | 0.651 | 0.341 |
| 233500_x_at  | CLEC2D                  | C-type lectin domain family 2, member D                                                                                                          | 0.624 | 0.341 |
| 206059_at    | ZNF91                   | zinc finger protein 91                                                                                                                           | 0.655 | 0.341 |
| 226682_at    | LOC283666               | hypothetical protein LOC283666                                                                                                                   | 0.656 | 0.341 |
| 225752_at    | NIPA1                   | non imprinted in Prader-Willi/Angelman syndrome 1                                                                                                | 0.631 | 0.341 |

|              |                                             |                                                                                                                                                            |       |       |
|--------------|---------------------------------------------|------------------------------------------------------------------------------------------------------------------------------------------------------------|-------|-------|
| 233415_at    | ERCC5                                       | Excision repair cross-complementing rodent repair deficiency, complementation group 5 (xeroderma pigmentosum, complementation group G (Cockayne syndrome)) | 0.557 | 0.341 |
| 218545_at    | CCDC91                                      | coiled-coil domain containing 91                                                                                                                           | 0.621 | 0.341 |
| 203712_at    | KIAA0020                                    | KIAA0020                                                                                                                                                   | 0.659 | 0.341 |
| 214250_at    | NUMA1                                       | nuclear mitotic apparatus protein 1                                                                                                                        | 0.512 | 0.341 |
| 1553380_at   | PARP15                                      | poly (ADP-ribose) polymerase family, member 15                                                                                                             | 0.614 | 0.341 |
| 230020_at    | ---                                         | Transcribed locus                                                                                                                                          | 0.584 | 0.341 |
| 219854_at    | ZNF14                                       | zinc finger protein 14                                                                                                                                     | 0.633 | 0.341 |
| 1558605_at   | ---                                         | CDNA clone IMAGE:4819775                                                                                                                                   | 0.563 | 0.341 |
| 227559_at    | ---                                         | ---                                                                                                                                                        | 0.552 | 0.341 |
| 226098_at    | IFT80                                       | intraflagellar transport 80 homolog (Chlamydomonas)                                                                                                        | 0.648 | 0.341 |
| 207417_s_at  | ZNF177                                      | zinc finger protein 177                                                                                                                                    | 0.655 | 0.341 |
| 238940_at    | KLF12                                       | Kruppel-like factor 12                                                                                                                                     | 0.644 | 0.341 |
| 213677_s_at  | PMS1                                        | PMS1 postmeiotic segregation increased 1 (S. cerevisiae)                                                                                                   | 0.628 | 0.341 |
| 202741_at    | PRKACB                                      | protein kinase, cAMP-dependent, catalytic, beta                                                                                                            | 0.658 | 0.341 |
| 204215_at    | C7orf23                                     | chromosome 7 open reading frame 23                                                                                                                         | 0.658 | 0.341 |
| 239709_at    | RP11-78J21.1                                | Heterogeneous nuclear ribonucleoprotein A1-like                                                                                                            | 0.647 | 0.341 |
| 226989_at    | RGMB                                        | RGM domain family, member B                                                                                                                                | 0.363 | 0.341 |
| 244189_at    | KIAA1648                                    | KIAA1648 protein                                                                                                                                           | 0.485 | 0.341 |
| 204547_at    | RAB40B                                      | RAB40B, member RAS oncogene family                                                                                                                         | 0.628 | 0.341 |
| 1567213_at   | PNN                                         | pinin, desmosome associated protein                                                                                                                        | 0.620 | 0.341 |
| 1560741_at   | SNRPN                                       | small nuclear ribonucleoprotein polypeptide N                                                                                                              | 0.616 | 0.341 |
| 229252_at    | ATG9B                                       | ATG9 autophagy related 9 homolog B (S. cerevisiae)                                                                                                         | 0.479 | 0.341 |
| 227859_at    | RBJ                                         | Ras-associated protein Rap1                                                                                                                                | 0.649 | 0.341 |
| 224860_at    | C9orf123                                    | chromosome 9 open reading frame 123                                                                                                                        | 0.593 | 0.341 |
| 226934_at    | ---                                         | CDNA FLJ41019 fis, clone UTERU2019096                                                                                                                      | 0.572 | 0.341 |
| 219368_at    | NAP1L2                                      | nucleosome assembly protein 1-like 2                                                                                                                       | 0.502 | 0.341 |
| 237746_at    | SFRS11                                      | Splicing factor, arginine/serine-rich 11                                                                                                                   | 0.488 | 0.341 |
| 243150_at    | ---                                         | Transcribed locus                                                                                                                                          | 0.664 | 0.341 |
| 205047_s_at  | ASNS                                        | asparagine synthetase                                                                                                                                      | 0.657 | 0.341 |
| 243899_at    | ARL17P1                                     | ADP-ribosylation factor-like 17 pseudogene 1                                                                                                               | 0.599 | 0.341 |
| 1558512_at   | ---                                         | CDNA FLJ33400 fis, clone BRACE2009828                                                                                                                      | 0.635 | 0.341 |
| 219595_at    | ZNF26                                       | zinc finger protein 26                                                                                                                                     | 0.637 | 0.341 |
| 1555004_a_at | RBL1                                        | retinoblastoma-like 1 (p107)                                                                                                                               | 0.643 | 0.341 |
| 244631_at    | LOC389834 ///<br>LOC642398 ///<br>LOC727834 | hypothetical gene supported by AK123403 ///<br>hypothetical LOC642398 /// hypothetical protein<br>LOC727834                                                | 0.333 | 0.341 |
| 212855_at    | DCUN1D4                                     | DCN1, defective in cullin neddylation 1, domain containing 4 (S. cerevisiae)                                                                               | 0.650 | 0.341 |
| 210180_s_at  | SFRS10                                      | splicing factor, arginine/serine-rich 10 (transformer 2 homolog, Drosophila)                                                                               | 0.658 | 0.341 |
| 227385_at    | PPAPDC2                                     | phosphatidic acid phosphatase type 2 domain containing 2                                                                                                   | 0.661 | 0.341 |
| 1557433_at   | GPSM2                                       | G-protein signalling modulator 2 (AGS3-like, C. elegans)                                                                                                   | 0.612 | 0.341 |
| 218006_s_at  | ZNF22                                       | zinc finger protein 22 (KOX 15)                                                                                                                            | 0.621 | 0.341 |

|              |                                            |                                                                                                                             |       |       |
|--------------|--------------------------------------------|-----------------------------------------------------------------------------------------------------------------------------|-------|-------|
| 239017_at    | ---                                        | Transcribed locus, moderately similar to XP_944674.2 similar to alpha 3 type VI collagen isoform 1 precursor [Homo sapiens] | 0.633 | 0.341 |
| 232291_at    | C13orf25                                   | chromosome 13 open reading frame 25                                                                                         | 0.666 | 0.341 |
| 223433_at    | C7orf36                                    | chromosome 7 open reading frame 36                                                                                          | 0.644 | 0.341 |
| 231022_at    | NAIP                                       | similar to Occludin                                                                                                         | 0.632 | 0.341 |
| 223588_at    | THAP2                                      | THAP domain containing, apoptosis associated protein 2                                                                      | 0.620 | 0.341 |
| 244045_at    | ---                                        | ---                                                                                                                         | 0.660 | 0.341 |
| 230187_s_at  | ---                                        | Full-length cDNA clone CS0DI042YD07 of Placenta Cot 25-normalized of Homo sapiens (human)                                   | 0.565 | 0.341 |
| 236935_at    | ---                                        | CDNA clone IMAGE:4813920                                                                                                    | 0.625 | 0.341 |
| 214180_at    | MAN1C1                                     | mannosidase, alpha, class 1C, member 1                                                                                      | 0.641 | 0.341 |
| 238501_at    | ---                                        | Transcribed locus                                                                                                           | 0.636 | 0.341 |
| 216945_x_at  | PASK                                       | PAS domain containing serine/threonine kinase                                                                               | 0.616 | 0.341 |
| 242509_at    | C16orf74                                   | Chromosome 16 open reading frame 74                                                                                         | 0.627 | 0.341 |
| 211856_x_at  | CD28                                       | CD28 molecule                                                                                                               | 0.559 | 0.341 |
| 219871_at    | FLJ13197 ///<br>LOC727852 ///<br>LOC731366 | hypothetical protein FLJ13197 /// hypothetical protein LOC727852 /// hypothetical protein LOC731366                         | 0.628 | 0.503 |
| 1563182_at   | ---                                        | CDNA clone IMAGE:4796641                                                                                                    | 0.521 | 0.503 |
| 211675_s_at  | MDFIC                                      | MyoD family inhibitor domain containing /// MyoD family inhibitor domain containing                                         | 0.641 | 0.503 |
| 213060_s_at  | CHI3L2                                     | chitinase 3-like 2 /// chitinase 3-like 2                                                                                   | 0.517 | 0.503 |
| 210278_s_at  | AP4S1                                      | adaptor-related protein complex 4, sigma 1 subunit                                                                          | 0.644 | 0.503 |
| 228242_at    | ---                                        | ---                                                                                                                         | 0.609 | 0.503 |
| 203893_at    | TAF9                                       | TAF9 RNA polymerase II, TATA box binding protein (TBP)-associated factor, 32kDa                                             | 0.605 | 0.503 |
| 208664_s_at  | TTC3                                       | tetratricopeptide repeat domain 3                                                                                           | 0.556 | 0.503 |
| 210718_s_at  | ARL17P1                                    | ADP-ribosylation factor-like 17 pseudogene 1                                                                                | 0.493 | 0.503 |
| 1555543_a_at | CLCC1                                      | chloride channel CLIC-like 1                                                                                                | 0.615 | 0.503 |
| 1568836_at   | CLK4                                       | CDC-like kinase 4                                                                                                           | 0.601 | 0.503 |
| 1554878_a_at | ABCD3                                      | ATP-binding cassette, sub-family D (ALD), member 3                                                                          | 0.657 | 0.503 |
| 221256_s_at  | HDHD3                                      | haloacid dehalogenase-like hydrolase domain containing 3 /// haloacid dehalogenase-like hydrolase domain containing 3       | 0.638 | 0.503 |
| 218490_s_at  | ZNF302                                     | zinc finger protein 302                                                                                                     | 0.543 | 0.503 |
| 227149_at    | TNRC6C                                     | trinucleotide repeat containing 6C                                                                                          | 0.647 | 0.503 |
| 235302_at    | ---                                        | Full-length cDNA clone CS0CAP006YP08 of Thymus of Homo sapiens (human)                                                      | 0.648 | 0.503 |
| 238774_at    | KIAA1267                                   | KIAA1267                                                                                                                    | 0.595 | 0.503 |
| 209442_x_at  | ANK3                                       | ankyrin 3, node of Ranvier (ankyrin G)                                                                                      | 0.609 | 0.503 |
| 242523_at    | ---                                        | Transcribed locus                                                                                                           | 0.571 | 0.503 |
| 204794_at    | DUSP2                                      | dual specificity phosphatase 2                                                                                              | 0.660 | 0.503 |
| 242900_at    | ---                                        | CDNA FLJ41107 fis, clone BLADE2007923                                                                                       | 0.655 | 0.503 |
| 222502_s_at  | UFM1                                       | ubiquitin-fold modifier 1                                                                                                   | 0.630 | 0.503 |

|              |                                                         |                                                                                                                                                                              |       |       |
|--------------|---------------------------------------------------------|------------------------------------------------------------------------------------------------------------------------------------------------------------------------------|-------|-------|
| 210034_s_at  | RPL5 ///<br>LOC388907 ///<br>LOC642146 ///<br>LOC647436 | ribosomal protein L5 /// similar to ribosomal protein L5<br>/// similar to ribosomal protein L5 /// similar to ribosomal<br>protein L5                                       | 0.596 | 0.503 |
| 225358_at    | DNAJC19                                                 | DnaJ (Hsp40) homolog, subfamily C, member 19                                                                                                                                 | 0.613 | 0.503 |
| 204148_s_at  | ZP3 ///<br>POMZP3 ///<br>MEIS3                          | zona pellucida glycoprotein 3 (sperm receptor) /// POM<br>(POM121 homolog, rat) and ZP3 fusion /// Meis1,<br>myeloid ecotropic viral integration site 1 homolog 3<br>(mouse) | 0.547 | 0.503 |
| 237009_at    | CD69                                                    | CD69 molecule                                                                                                                                                                | 0.566 | 0.503 |
| 218005_at    | ZNF22                                                   | zinc finger protein 22 (KOX 15)                                                                                                                                              | 0.637 | 0.503 |
| 215743_at    | NMT2                                                    | N-myristoyltransferase 2                                                                                                                                                     | 0.627 | 0.503 |
| 211209_x_at  | SH2D1A                                                  | SH2 domain protein 1A, Duncan's disease<br>(lymphoproliferative syndrome)                                                                                                    | 0.586 | 0.503 |
| 1558093_s_at | MATR3                                                   | matrin 3                                                                                                                                                                     | 0.617 | 0.503 |
| 203856_at    | VRK1                                                    | vaccinia related kinase 1                                                                                                                                                    | 0.636 | 0.503 |
| 211106_at    | SUPT3H                                                  | suppressor of Ty 3 homolog (S. cerevisiae)                                                                                                                                   | 0.542 | 0.503 |
| 231975_s_at  | MIER3                                                   | mesoderm induction early response 1, family member 3                                                                                                                         | 0.593 | 0.503 |
| 238174_at    | FBXL17                                                  | F-box and leucine-rich repeat protein 17                                                                                                                                     | 0.666 | 0.503 |
| 210910_s_at  | POMZP3                                                  | POM (POM121 homolog, rat) and ZP3 fusion                                                                                                                                     | 0.486 | 0.503 |
| 235230_at    | PLCXD2                                                  | Phosphatidylinositol-specific phospholipase C, X<br>domain containing 2                                                                                                      | 0.639 | 0.503 |
| 230388_s_at  | LOC644246                                               | hypothetical protein LOC644246                                                                                                                                               | 0.564 | 0.503 |
| 1554609_at   | MGC12965                                                | similar to Cytochrome c, somatic                                                                                                                                             | 0.574 | 0.503 |
| 224364_s_at  | PPIL3                                                   | peptidylprolyl isomerase (cyclophilin)-like 3 ///<br>peptidylprolyl isomerase (cyclophilin)-like 3                                                                           | 0.652 | 0.503 |
| 210435_at    | LOC641522                                               | ADP-ribosylation factor-like protein                                                                                                                                         | 0.407 | 0.503 |
| 232341_x_at  | HABP4                                                   | hyaluronan binding protein 4                                                                                                                                                 | 0.659 | 0.503 |
| 228908_s_at  | C21orf86                                                | Chromosome 21 open reading frame 86                                                                                                                                          | 0.635 | 0.503 |
| 227141_at    | TYW3                                                    | tRNA-yW synthesizing protein 3 homolog (S. cerevisiae)                                                                                                                       | 0.647 | 0.503 |
| 225455_at    | TADA1L                                                  | transcriptional adaptor 1 (HFI1 homolog, yeast)-like                                                                                                                         | 0.642 | 0.503 |
| 226290_at    | BDP1                                                    | B double prime 1, subunit of RNA polymerase III<br>transcription initiation factor IIIB                                                                                      | 0.661 | 0.503 |
| 243179_at    | ---                                                     | CDNA FLJ33993 fis, clone DFNES2007757                                                                                                                                        | 0.634 | 0.503 |
| 227375_at    | ANKRD13C                                                | ankyrin repeat domain 13C                                                                                                                                                    | 0.618 | 0.503 |
| 223118_s_at  | USP47                                                   | ubiquitin specific peptidase 47                                                                                                                                              | 0.653 | 0.503 |
| 217850_at    | GNL3                                                    | guanine nucleotide binding protein-like 3 (nucleolar)                                                                                                                        | 0.651 | 0.503 |
| 216166_at    | RHOH                                                    | Ras homolog gene family, member H                                                                                                                                            | 0.577 | 0.503 |
| 219038_at    | MORC4                                                   | MORC family CW-type zinc finger 4                                                                                                                                            | 0.619 | 0.503 |
| 227641_at    | FBXL16                                                  | F-box and leucine-rich repeat protein 16                                                                                                                                     | 0.643 | 0.503 |
| 1555830_s_at | FAM62B                                                  | family with sequence similarity 62 (C2 domain<br>containing) member B                                                                                                        | 0.533 | 0.503 |
| 1555355_a_at | ETS1                                                    | v-ets erythroblastosis virus E26 oncogene homolog 1<br>(avian)                                                                                                               | 0.643 | 0.503 |
| 226475_at    | FAM118A                                                 | family with sequence similarity 118, member A                                                                                                                                | 0.655 | 0.503 |
| 210078_s_at  | KCNAB1                                                  | potassium voltage-gated channel, shaker-related<br>subfamily, beta member 1                                                                                                  | 0.610 | 0.503 |

|              |                                 |                                                                                                                                          |       |       |
|--------------|---------------------------------|------------------------------------------------------------------------------------------------------------------------------------------|-------|-------|
| 209993_at    | ABCB1                           | ATP-binding cassette, sub-family B (MDR/TAP), member 1                                                                                   | 0.634 | 0.503 |
| 214470_at    | KLRB1                           | killer cell lectin-like receptor subfamily B, member 1 /// killer cell lectin-like receptor subfamily B, member 1                        | 0.521 | 0.503 |
| 224507_s_at  | MGC12916                        | hypothetical protein MGC12916 /// hypothetical protein MGC12916                                                                          | 0.652 | 0.503 |
| 201313_at    | ENO2                            | enolase 2 (gamma, neuronal)                                                                                                              | 0.653 | 0.503 |
| 205371_s_at  | DBT                             | dihydrolipoamide branched chain transacylase E2                                                                                          | 0.652 | 0.503 |
| 213645_at    | ENOSF1                          | enolase superfamily member 1                                                                                                             | 0.616 | 0.503 |
| 241819_at    | ---                             | ---                                                                                                                                      | 0.659 | 0.503 |
| 222201_s_at  | CASP8AP2                        | CASP8 associated protein 2                                                                                                               | 0.655 | 0.503 |
| 216683_at    | TBCA                            | Tubulin folding cofactor A                                                                                                               | 0.584 | 0.503 |
| 1556839_s_at | SPTBN5 ///<br>VEPH1             | Homo sapiens, clone IMAGE:4704591 /// Spectrin, beta, non-erythrocytic 5 /// Ventricular zone expressed PH domain homolog 1 (zebrafish)  | 0.608 | 0.503 |
| 221683_s_at  | CEP290                          | centrosomal protein 290kDa                                                                                                               | 0.605 | 0.503 |
| 227678_at    | XRCC6BP1                        | XRCC6 binding protein 1                                                                                                                  | 0.572 | 0.503 |
| 1555691_a_at | KLRC4 ///<br>KLRK1              | killer cell lectin-like receptor subfamily C, member 4 /// killer cell lectin-like receptor subfamily K, member 1                        | 0.574 | 0.503 |
| 226642_s_at  | NUDCD2                          | NudC domain containing 2                                                                                                                 | 0.658 | 0.503 |
| 235652_at    | SCML1                           | Sex comb on midleg-like 1 (Drosophila)                                                                                                   | 0.558 | 0.503 |
| 216056_at    | CD44                            | CD44 molecule (Indian blood group)                                                                                                       | 0.610 | 0.503 |
| 235260_s_at  | C4orf28                         | chromosome 4 open reading frame 28                                                                                                       | 0.630 | 0.503 |
| 210694_s_at  | ---                             | ---                                                                                                                                      | 0.608 | 0.503 |
| 218859_s_at  | ESF1                            | ESF1, nucleolar pre-rRNA processing protein, homolog (S. cerevisiae)                                                                     | 0.655 | 0.503 |
| 224713_at    | MKI67IP                         | MKI67 (FHA domain) interacting nucleolar phosphoprotein                                                                                  | 0.633 | 0.503 |
| 1564435_a_at | KRT72                           | keratin 72                                                                                                                               | 0.373 | 0.503 |
| 235101_at    | FNBP4                           | formin binding protein 4                                                                                                                 | 0.644 | 0.503 |
| 226350_at    | CHML                            | choroideremia-like (Rab escort protein 2)                                                                                                | 0.645 | 0.503 |
| 216850_at    | SNRPN                           | small nuclear ribonucleoprotein polypeptide N                                                                                            | 0.604 | 0.503 |
| 223089_at    | VEZT                            | vezatin, adherens junctions transmembrane protein                                                                                        | 0.584 | 0.503 |
| 225594_at    | CREBZF                          | CREB/ATF bZIP transcription factor                                                                                                       | 0.651 | 0.503 |
| 235540_at    | ---                             | ---                                                                                                                                      | 0.623 | 0.503 |
| 236106_at    | C17orf67                        | Chromosome 17 open reading frame 67                                                                                                      | 0.632 | 0.503 |
| 210676_x_at  | RGPD5 ///<br>RGPD8 ///<br>RGPD6 | RANBP2-like and GRIP domain containing 5 ///<br>RANBP2-like and GRIP domain containing 8 ///<br>RANBP2-like and GRIP domain containing 6 | 0.652 | 0.503 |
| 202843_at    | DNAJB9                          | DnaJ (Hsp40) homolog, subfamily B, member 9                                                                                              | 0.646 | 0.503 |
| 203362_s_at  | MAD2L1                          | MAD2 mitotic arrest deficient-like 1 (yeast)                                                                                             | 0.644 | 0.503 |
| 1560171_at   | SHPRH                           | SNF2 histone linker PHD RING helicase                                                                                                    | 0.641 | 0.503 |
| 231241_at    | LOC645744                       | Similar to PCAF associated factor 65 beta isoform b                                                                                      | 0.659 | 0.503 |
| 230149_at    | ---                             | Transcribed locus                                                                                                                        | 0.543 | 0.503 |
| 225424_at    | GPAM                            | glycerol-3-phosphate acyltransferase, mitochondrial                                                                                      | 0.658 | 0.503 |
| 218127_at    | NFYB                            | nuclear transcription factor Y, beta                                                                                                     | 0.589 | 0.503 |
| 1555890_at   | LOC728377                       | Similar to rho guanine nucleotide exchange factor 5                                                                                      | 0.660 | 0.503 |
| 1569040_s_at | FLJ40330                        | similar to protein immuno-reactive with anti-PTH polyclonal antibodies                                                                   | 0.422 | 0.503 |
| 222580_at    | ZNF644                          | zinc finger protein 644                                                                                                                  | 0.664 | 0.503 |

|              |                                                        |                                                                                                                                                                                               |       |       |
|--------------|--------------------------------------------------------|-----------------------------------------------------------------------------------------------------------------------------------------------------------------------------------------------|-------|-------|
| 1565811_at   | ---                                                    | CDNA clone IMAGE:5278245                                                                                                                                                                      | 0.638 | 0.503 |
| 227124_at    | LOC221710                                              | Hypothetical protein LOC221710                                                                                                                                                                | 0.647 | 0.503 |
| 244490_at    | ---                                                    | MRNA; cDNA DKFZp686B0610 (from clone DKFZp686B0610)                                                                                                                                           | 0.618 | 0.503 |
| 224285_at    | GPR174                                                 | G protein-coupled receptor 174                                                                                                                                                                | 0.633 | 0.503 |
| 239385_at    | TFG                                                    | TRK-fused gene                                                                                                                                                                                | 0.656 | 0.503 |
| 231964_at    | ---                                                    | MRNA; cDNA DKFZp564H1663 (from clone DKFZp564H1663)                                                                                                                                           | 0.633 | 0.503 |
| 205250_s_at  | CEP290                                                 | centrosomal protein 290kDa                                                                                                                                                                    | 0.614 | 0.503 |
| 216050_at    | ---                                                    | CDNA: FLJ20931 fis, clone ADSE01282                                                                                                                                                           | 0.562 | 0.503 |
| 222805_at    | MANEA                                                  | mannosidase, endo-alpha                                                                                                                                                                       | 0.638 | 0.503 |
| 213687_s_at  | RPL35A                                                 | ribosomal protein L35a                                                                                                                                                                        | 0.625 | 0.503 |
| 204917_s_at  | MLLT3                                                  | myeloid/lymphoid or mixed-lineage leukemia (trithorax homolog, Drosophila); translocated to, 3                                                                                                | 0.664 | 0.503 |
| 226764_at    | LOC152485                                              | hypothetical protein LOC152485                                                                                                                                                                | 0.652 | 0.503 |
| 201485_s_at  | RCN2                                                   | reticulocalbin 2, EF-hand calcium binding domain                                                                                                                                              | 0.628 | 0.503 |
| 232063_x_at  | FARSLB                                                 | phenylalanine-tRNA synthetase-like, beta subunit                                                                                                                                              | 0.580 | 0.679 |
| 239063_at    | ---                                                    | CDNA FLJ39803 fis, clone SPLEN2007794                                                                                                                                                         | 0.644 | 0.679 |
| 235635_at    | ARHGAP5                                                | Rho GTPase activating protein 5                                                                                                                                                               | 0.632 | 0.679 |
| 207583_at    | ABCD2                                                  | ATP-binding cassette, sub-family D (ALD), member 2                                                                                                                                            | 0.635 | 0.679 |
| 1558842_at   | ---                                                    | ---                                                                                                                                                                                           | 0.536 | 0.679 |
| 223079_s_at  | GLS                                                    | glutaminase                                                                                                                                                                                   | 0.622 | 0.679 |
| 222073_at    | COL4A3                                                 | collagen, type IV, alpha 3 (Goodpasture antigen)                                                                                                                                              | 0.455 | 0.679 |
| 217482_at    | ---                                                    | CDNA FLJ11925 fis, clone HEMBB1000354                                                                                                                                                         | 0.628 | 0.679 |
| 213304_at    | KIAA0423                                               | KIAA0423                                                                                                                                                                                      | 0.650 | 0.679 |
| 209433_s_at  | PPAT                                                   | phosphoribosyl pyrophosphate amidotransferase                                                                                                                                                 | 0.497 | 0.679 |
| 228961_at    | MIER3                                                  | mesoderm induction early response 1, family member 3                                                                                                                                          | 0.653 | 0.679 |
| 204905_s_at  | EEF1E1                                                 | eukaryotic translation elongation factor 1 epsilon 1                                                                                                                                          | 0.512 | 0.679 |
| 211709_s_at  | CLEC11A                                                | C-type lectin domain family 11, member A /// C-type lectin domain family 11, member A                                                                                                         | 0.412 | 0.679 |
| 242363_at    | ---                                                    | Full-length cDNA clone CS0DF025YA01 of Fetal brain of Homo sapiens (human)                                                                                                                    | 0.660 | 0.679 |
| 220048_at    | EDAR                                                   | ectodysplasin A receptor                                                                                                                                                                      | 0.576 | 0.679 |
| 225088_at    | C16orf63                                               | chromosome 16 open reading frame 63                                                                                                                                                           | 0.586 | 0.679 |
| 219049_at    | ChGn                                                   | chondroitin beta1,4 N-acetylgalactosaminyltransferase                                                                                                                                         | 0.636 | 0.679 |
| 1553400_a_at | C17orf69                                               | chromosome 17 open reading frame 69                                                                                                                                                           | 0.625 | 0.679 |
| 200705_s_at  | EEF1B2                                                 | eukaryotic translation elongation factor 1 beta 2                                                                                                                                             | 0.578 | 0.679 |
| 222128_at    | NSUN6                                                  | NOL1/NOP2/Sun domain family, member 6                                                                                                                                                         | 0.651 | 0.679 |
| 240246_at    | ---                                                    | CDNA FLJ44826 fis, clone BRACE3046762                                                                                                                                                         | 0.531 | 0.679 |
| 235535_x_at  | FRG1 ///<br>MGC72104 ///<br>LOC642236 ///<br>LOC730510 | FSHD region gene 1 /// similar to FRG1 protein (FSHD region gene 1 protein) /// similar to FRG1 protein (FSHD region gene 1 protein) /// similar to FRG1 protein (FSHD region gene 1 protein) | 0.584 | 0.679 |
| 235150_at    | ---                                                    | MRNA; cDNA DKFZp313B1017 (from clone DKFZp313B1017)                                                                                                                                           | 0.595 | 0.679 |
| 204559_s_at  | LSM7                                                   | LSM7 homolog, U6 small nuclear RNA associated (S. cerevisiae)                                                                                                                                 | 0.663 | 0.679 |
| 236316_at    | FAM3C                                                  | family with sequence similarity 3, member C                                                                                                                                                   | 0.590 | 0.679 |

## Supplementary table 2

## Downregulated transcripts

|              |                                                         |                                                                                                                                                                          |       |       |
|--------------|---------------------------------------------------------|--------------------------------------------------------------------------------------------------------------------------------------------------------------------------|-------|-------|
| 215339_at    | NKTR                                                    | natural killer-tumor recognition sequence                                                                                                                                | 0.613 | 0.679 |
| 230305_at    | ---                                                     | Transcribed locus                                                                                                                                                        | 0.568 | 0.679 |
| 242393_x_at  | LOC399761 ///<br>LOC643564 ///<br>CTGLF9P ///<br>CTGLF2 | hypothetical protein LOC399761 /// hypothetical protein<br>LOC643564 /// centaurin, gamma-like family, member 9<br>pseudogene /// centaurin, gamma-like family, member 2 | 0.647 | 0.679 |
| 202260_s_at  | STXBP1                                                  | syntaxin binding protein 1                                                                                                                                               | 0.607 | 0.679 |
| 235170_at    | ZNF92                                                   | zinc finger protein 92                                                                                                                                                   | 0.620 | 0.679 |
| 239266_at    | SNHG5                                                   | Small nucleolar RNA host gene (non-protein coding) 5                                                                                                                     | 0.661 | 0.679 |
| 221092_at    | IKZF3                                                   | IKAROS family zinc finger 3 (Aiolos)                                                                                                                                     | 0.534 | 0.679 |
| 1555120_at   | CD96                                                    | CD96 molecule                                                                                                                                                            | 0.617 | 0.679 |
| 223681_s_at  | INADL                                                   | InaD-like (Drosophila)                                                                                                                                                   | 0.649 | 0.679 |
| 233519_at    | ARL17P1                                                 | ADP-ribosylation factor-like 17 pseudogene 1                                                                                                                             | 0.558 | 0.679 |
| 227255_at    | PDIK1L                                                  | PDLIM1 interacting kinase 1 like                                                                                                                                         | 0.667 | 0.679 |
| 200002_at    | RPL35                                                   | ribosomal protein L35 /// ribosomal protein L35                                                                                                                          | 0.663 | 0.679 |
| 1557166_at   | PDCD4                                                   | programmed cell death 4 (neoplastic transformation inhibitor)                                                                                                            | 0.654 | 0.679 |
| 1555913_at   | GON4L                                                   | gon-4-like (C. elegans)                                                                                                                                                  | 0.648 | 0.679 |
| 210690_at    | KLRC4                                                   | killer cell lectin-like receptor subfamily C, member 4                                                                                                                   | 0.513 | 0.679 |
| 240829_at    | PEX3                                                    | Peroxisomal biogenesis factor 3                                                                                                                                          | 0.642 | 0.679 |
| 204160_s_at  | ENPP4                                                   | ectonucleotide pyrophosphatase/phosphodiesterase 4 (putative function)                                                                                                   | 0.581 | 0.679 |
| 243835_at    | ZDHC21                                                  | Zinc finger, DHHC-type containing 21                                                                                                                                     | 0.569 | 0.679 |
| 1554606_at   | CCDC100                                                 | coiled-coil domain containing 100                                                                                                                                        | 0.656 | 0.679 |
| 232164_s_at  | EPPK1                                                   | epiplakin 1                                                                                                                                                              | 0.454 | 0.679 |
| 1559401_a_at | ZNF609                                                  | Zinc finger protein 609                                                                                                                                                  | 0.645 | 0.679 |
| 226003_at    | KIF21A                                                  | kinesin family member 21A                                                                                                                                                | 0.632 | 0.679 |
| 243319_at    | MED31                                                   | Mediator of RNA polymerase II transcription, subunit 31 homolog (S. cerevisiae)                                                                                          | 0.655 | 0.679 |
| 214251_s_at  | NUMA1                                                   | nuclear mitotic apparatus protein 1                                                                                                                                      | 0.656 | 0.679 |
| 210461_s_at  | ABLIM1                                                  | actin binding LIM protein 1                                                                                                                                              | 0.661 | 0.679 |
| 210639_s_at  | ATG5                                                    | ATG5 autophagy related 5 homolog (S. cerevisiae)                                                                                                                         | 0.662 | 0.679 |
| 235616_at    | ---                                                     | ---                                                                                                                                                                      | 0.419 | 0.679 |
| 229028_s_at  | LOC641522                                               | ADP-ribosylation factor-like protein                                                                                                                                     | 0.586 | 0.679 |
| 1555125_at   | C21orf66                                                | chromosome 21 open reading frame 66                                                                                                                                      | 0.652 | 0.679 |
| 1554450_s_at | MIER3                                                   | mesoderm induction early response 1, family member 3                                                                                                                     | 0.645 | 0.679 |
| 236760_at    | AMMECR1                                                 | Alport syndrome, mental retardation, midface hypoplasia and elliptocytosis chromosomal region, gene 1                                                                    | 0.616 | 0.679 |
| 238443_at    | ---                                                     | ---                                                                                                                                                                      | 0.633 | 0.679 |
| 242577_at    | LOC642398 ///<br>LOC727834                              | hypothetical LOC642398 /// hypothetical protein<br>LOC727834                                                                                                             | 0.368 | 0.679 |
| 206497_at    | C7orf44                                                 | chromosome 7 open reading frame 44                                                                                                                                       | 0.665 | 0.679 |
| 243093_at    | ---                                                     | ---                                                                                                                                                                      | 0.660 | 0.679 |
| 228529_at    | ---                                                     | Transcribed locus                                                                                                                                                        | 0.641 | 0.679 |
| 207845_s_at  | ANAPC10                                                 | anaphase promoting complex subunit 10                                                                                                                                    | 0.625 | 0.679 |
| 229437_at    | BIC                                                     | BIC transcript                                                                                                                                                           | 0.554 | 0.679 |
| 240070_at    | VSIG9                                                   | V-set and immunoglobulin domain containing 9                                                                                                                             | 0.653 | 0.679 |

|              |                     |                                                                                                  |       |       |
|--------------|---------------------|--------------------------------------------------------------------------------------------------|-------|-------|
| 244035_at    | BCL2                | B-cell CLL/lymphoma 2                                                                            | 0.461 | 0.679 |
| 220444_at    | ZNF557              | zinc finger protein 557                                                                          | 0.563 | 0.679 |
| 202512_s_at  | ATG5                | ATG5 autophagy related 5 homolog (S. cerevisiae)                                                 | 0.625 | 0.679 |
| 1558279_a_at | ---                 | CDNA FLJ36555 fis, clone TRACH2008716                                                            | 0.666 | 0.679 |
| 1568658_at   | LOC339804           | hypothetical gene supported by AK075484; BC014578                                                | 0.640 | 0.679 |
| 214567_s_at  | XCL1 /// XCL2       | chemokine (C motif) ligand 1 /// chemokine (C motif) ligand 2                                    | 0.625 | 0.679 |
| 235296_at    | EIF5A2              | eukaryotic translation initiation factor 5A2                                                     | 0.636 | 0.679 |
| 204353_s_at  | POT1                | POT1 protection of telomeres 1 homolog (S. pombe)                                                | 0.661 | 0.679 |
| 242134_at    | ---                 | Transcribed locus                                                                                | 0.641 | 0.679 |
| 205139_s_at  | UST                 | uronyl-2-sulfotransferase                                                                        | 0.641 | 0.679 |
| 228050_at    | UTP15               | UTP15, U3 small nucleolar ribonucleoprotein, homolog (S. cerevisiae)                             | 0.658 | 0.679 |
| 201757_at    | NDUFS5              | NADH dehydrogenase (ubiquinone) Fe-S protein 5, 15kDa (NADH-coenzyme Q reductase)                | 0.637 | 0.925 |
| 214097_at    | RPS21               | ribosomal protein S21                                                                            | 0.641 | 0.925 |
| 1555972_s_at | FBXO28              | F-box protein 28                                                                                 | 0.658 | 0.925 |
| 206157_at    | PTX3                | pentraxin-related gene, rapidly induced by IL-1 beta                                             | 0.657 | 0.925 |
| 229187_at    | ZNF542 /// MGC72104 | Zinc finger protein 542 /// Similar to FRG1 protein (FSDH region gene 1 protein)                 | 0.635 | 0.925 |
| 205040_at    | ORM1                | orosomuroid 1                                                                                    | 0.535 | 0.925 |
| 227993_at    | METAP2              | methionyl aminopeptidase 2                                                                       | 0.660 | 0.925 |
| 213461_at    | NUDT21              | nudix (nucleoside diphosphate linked moiety X)-type motif 21                                     | 0.663 | 0.925 |
| 209662_at    | CETN3               | centrin, EF-hand protein, 3 (CDC31 homolog, yeast)                                               | 0.623 | 0.925 |
| 225014_at    | LOC389203           | hypothetical gene supported by BC032431                                                          | 0.613 | 0.925 |
| 223301_s_at  | CCDC82              | coiled-coil domain containing 82                                                                 | 0.658 | 0.925 |
| 218129_s_at  | NFYB                | nuclear transcription factor Y, beta                                                             | 0.540 | 0.925 |
| 223231_at    | TATDN1              | TatD DNase domain containing 1                                                                   | 0.612 | 0.925 |
| 220961_s_at  | TBRG4               | transforming growth factor beta regulator 4 /// transforming growth factor beta regulator 4      | 0.533 | 0.925 |
| 234165_at    | PTGDR               | prostaglandin D2 receptor (DP)                                                                   | 0.666 | 0.925 |
| 219073_s_at  | OSBPL10             | oxysterol binding protein-like 10                                                                | 0.588 | 0.925 |
| 214876_s_at  | TUBGCP5             | tubulin, gamma complex associated protein 5                                                      | 0.661 | 0.925 |
| 218100_s_at  | IFT57               | intraflagellar transport 57 homolog (Chlamydomonas)                                              | 0.579 | 0.925 |
| 224841_x_at  | GAS5                | growth arrest-specific 5                                                                         | 0.575 | 0.925 |
| 1553055_a_at | SLFN5               | schlafen family member 5                                                                         | 0.613 | 0.925 |
| 236341_at    | CTLA4               | cytotoxic T-lymphocyte-associated protein 4                                                      | 0.627 | 0.925 |
| 201812_s_at  | TOMM7 /// LOC201725 | translocase of outer mitochondrial membrane 7 homolog (yeast) /// hypothetical protein LOC201725 | 0.588 | 0.925 |
| 229656_s_at  | FLJ42562            | similar to echinoderm microtubule associated protein like 5                                      | 0.575 | 0.925 |
| 212765_at    | CAMSAP1L1           | calmodulin regulated spectrin-associated protein 1-like 1                                        | 0.596 | 0.925 |
| 213683_at    | ACSL6               | acyl-CoA synthetase long-chain family member 6                                                   | 0.629 | 0.925 |
| 237839_at    | ANK3                | Ankyrin 3, node of Ranvier (ankyrin G)                                                           | 0.533 | 0.925 |
| 212216_at    | PREPL               | prolyl endopeptidase-like                                                                        | 0.588 | 0.925 |
| 219109_at    | SPAG16              | sperm associated antigen 16                                                                      | 0.613 | 0.925 |
| 205230_at    | RPH3A               | rabphilin 3A homolog (mouse)                                                                     | 0.532 | 0.925 |
| 218698_at    | APIP                | APAF1 interacting protein                                                                        | 0.567 | 0.925 |

|              |          |                                                                        |       |       |
|--------------|----------|------------------------------------------------------------------------|-------|-------|
| 220169_at    | TMEM156  | transmembrane protein 156                                              | 0.642 | 0.925 |
| 219313_at    | GRAMD1C  | GRAM domain containing 1C                                              | 0.612 | 0.925 |
| 203303_at    | DYNLT3   | dynein, light chain, Tctex-type 3                                      | 0.642 | 0.925 |
| 226238_at    | MCEE     | methylmalonyl CoA epimerase                                            | 0.659 | 0.925 |
| 239833_at    | COMMD1   | Copper metabolism (Murr1) domain containing 1                          | 0.658 | 0.925 |
| 228378_at    | C12orf29 | chromosome 12 open reading frame 29                                    | 0.641 | 0.925 |
| 214908_s_at  | TRRAP    | transformation/transcription domain-associated protein                 | 0.623 | 0.925 |
| 240105_at    | C21orf66 | Chromosome 21 open reading frame 66                                    | 0.666 | 0.925 |
| 214007_s_at  | TWF1     | twinfilin, actin-binding protein, homolog 1 (Drosophila)               | 0.644 | 0.925 |
| 211210_x_at  | SH2D1A   | SH2 domain protein 1A, Duncan's disease (lymphoproliferative syndrome) | 0.600 | 0.925 |
| 209570_s_at  | D4S234E  | DNA segment on chromosome 4 (unique) 234 expressed sequence            | 0.556 | 0.925 |
| 225439_at    | NUDCD1   | NudC domain containing 1                                               | 0.608 | 0.925 |
| 215118_s_at  | IGHA1    | Immunoglobulin heavy constant alpha 1                                  | 0.611 | 0.925 |
| 231950_at    | ZNF658   | zinc finger protein 658                                                | 0.665 | 0.925 |
| 1556889_s_at | ---      | CDNA FLJ37963 fis, clone CTONG2009689                                  | 0.646 | 0.925 |
| 1553725_s_at | ZNF644   | zinc finger protein 644                                                | 0.651 | 0.925 |
| 241403_at    | CLK4     | CDC-like kinase 4                                                      | 0.551 | 0.925 |
| 219714_s_at  | CACNA2D3 | calcium channel, voltage-dependent, alpha 2/delta 3 subunit            | 0.641 | 0.925 |
| 220917_s_at  | WDR19    | WD repeat domain 19                                                    | 0.627 | 0.925 |
| 208978_at    | CRIP2    | cysteine-rich protein 2                                                | 0.467 | 0.925 |
| 226750_at    | LARP2    | La ribonucleoprotein domain family, member 2                           | 0.653 | 0.925 |
| 224741_x_at  | GAS5     | growth arrest-specific 5                                               | 0.581 | 0.925 |
| 205803_s_at  | TRPC1    | transient receptor potential cation channel, subfamily C, member 1     | 0.614 | 0.925 |
| 203939_at    | NT5E     | 5'-nucleotidase, ecto (CD73)                                           | 0.615 | 0.925 |
| 243878_at    | FOXP1    | Forkhead box P1                                                        | 0.651 | 0.925 |
| 207723_s_at  | KLRC3    | killer cell lectin-like receptor subfamily C, member 3                 | 0.403 | 0.925 |
| 235078_at    | NBEAL1   | Neurobeachin-like 1                                                    | 0.663 | 0.925 |
| 228941_at    | ---      | Transcribed locus                                                      | 0.657 | 0.925 |
| 203337_x_at  | ITGB1BP1 | integrin beta 1 binding protein 1                                      | 0.631 | 0.925 |
| 208826_x_at  | HINT1    | histidine triad nucleotide binding protein 1                           | 0.597 | 1.191 |
| 227246_at    | ---      | ---                                                                    | 0.645 | 1.191 |
| 1562028_at   | CCND3    | Cyclin D3                                                              | 0.579 | 1.191 |
| 235920_at    | ---      | Transcribed locus                                                      | 0.646 | 1.191 |
| 243049_at    | ---      | ---                                                                    | 0.648 | 1.191 |
| 241808_at    | C8orf70  | Chromosome 8 open reading frame 70                                     | 0.666 | 1.191 |
| 228053_s_at  | C9orf105 | chromosome 9 open reading frame 105                                    | 0.611 | 1.191 |
| 224496_s_at  | TMEM107  | transmembrane protein 107 /// transmembrane protein 107                | 0.665 | 1.191 |
| 209795_at    | CD69     | CD69 molecule                                                          | 0.557 | 1.191 |
| 219147_s_at  | C9orf95  | chromosome 9 open reading frame 95                                     | 0.654 | 1.191 |
| 218311_at    | MAP4K3   | mitogen-activated protein kinase kinase kinase kinase 3                | 0.658 | 1.191 |
| 204864_s_at  | IL6ST    | interleukin 6 signal transducer (gp130, oncostatin M receptor)         | 0.662 | 1.191 |
| 226344_at    | ZMAT1    | zinc finger, matrin type 1                                             | 0.592 | 1.191 |
| 229850_at    | ---      | Full length insert cDNA clone YX81F03                                  | 0.648 | 1.191 |

## Supplementary table 2

## Downregulated transcripts

|              |               |                                                                                           |       |       |
|--------------|---------------|-------------------------------------------------------------------------------------------|-------|-------|
| 225341_at    | MTERFD3       | MTERF domain containing 3                                                                 | 0.622 | 1.191 |
| 1557624_at   | ZNF141        | Zinc finger protein 141                                                                   | 0.600 | 1.191 |
| 205619_s_at  | MEOX1         | mesenchyme homeobox 1                                                                     | 0.579 | 1.191 |
| 226558_at    | LOC653071     | similar to CG32820-PA, isoform A                                                          | 0.438 | 1.191 |
| 1569392_at   | GPSN2         | glycoprotein, synaptic 2                                                                  | 0.638 | 1.191 |
| 236128_at    | ZNF91         | zinc finger protein 91                                                                    | 0.666 | 1.191 |
|              | RPL31 ///     |                                                                                           |       |       |
|              | LOC285260 /// |                                                                                           |       |       |
|              | RPL31P4 ///   |                                                                                           |       |       |
|              | RPL31P10 ///  | ribosomal protein L31 ///                                                                 |       |       |
|              | LOC641790 /// | L31 ///                                                                                   |       |       |
| 200962_at    | LOC646841 /// | ribosomal protein L31 pseudogene 10 ///                                                   | 0.665 | 1.191 |
|              | LOC648737 /// | ribosomal protein L31 ///                                                                 |       |       |
|              | LOC653773 /// | L31 ///                                                                                   |       |       |
|              | LOC727792 /// |                                                                                           |       |       |
|              | LOC729646 /// |                                                                                           |       |       |
|              | LOC732015     |                                                                                           |       |       |
| 213331_s_at  | NEK1          | NIMA (never in mitosis gene a)-related kinase 1                                           | 0.634 | 1.191 |
| 200038_s_at  | RPL17         | ribosomal protein L17 ///                                                                 | 0.603 | 1.191 |
| 228160_at    | LOC400642     | hypothetical gene supported by BC041875; BX648984                                         | 0.654 | 1.191 |
| 206492_at    | FHIT          | fragile histidine triad gene                                                              | 0.421 | 1.191 |
| 213391_at    | DPY19L4       | dpy-19-like 4 (C. elegans)                                                                | 0.578 | 1.191 |
| 223341_s_at  | SCOC          | short coiled-coil protein                                                                 | 0.561 | 1.191 |
| 207721_x_at  | HINT1         | histidine triad nucleotide binding protein 1                                              | 0.613 | 1.191 |
| 214155_s_at  | LARP4         | La ribonucleoprotein domain family, member 4                                              | 0.662 | 1.191 |
| 213174_at    | TTC9          | tetratricopeptide repeat domain 9                                                         | 0.646 | 1.191 |
| 219399_at    | LIN7C         | lin-7 homolog C (C. elegans)                                                              | 0.655 | 1.191 |
| 235412_at    | ARHGEF7       | Rho guanine nucleotide exchange factor (GEF) 7                                            | 0.619 | 1.191 |
| 226458_at    | ---           | CDNA FLJ30340 fis, clone BRACE2007411                                                     | 0.637 | 1.191 |
| 238790_at    | LOC374443     | CLR pseudogene                                                                            | 0.615 | 1.191 |
| 223154_at    | MRPL1         | mitochondrial ribosomal protein L1                                                        | 0.609 | 1.191 |
| 204577_s_at  | CLUAP1        | clusterin associated protein 1                                                            | 0.627 | 1.191 |
| 218395_at    | ACTR6         | ARP6 actin-related protein 6 homolog (yeast)                                              | 0.643 | 1.191 |
| 220735_s_at  | SEN7          | SUMO1/sentrin specific peptidase 7                                                        | 0.662 | 1.191 |
| 212544_at    | ZNHIT3        | zinc finger, HIT type 3                                                                   | 0.625 | 1.191 |
| 205511_at    | FLJ10038      | hypothetical protein FLJ10038                                                             | 0.659 | 1.191 |
| 1559205_s_at | ---           | Homo sapiens, clone IMAGE:5745627, mRNA                                                   | 0.625 | 1.191 |
| 237625_s_at  | ---           | Immunoglobulin light chain variable region complementarity determining region (CDR3) mRNA | 0.500 | 1.191 |
| 212537_x_at  | RPL17         | ribosomal protein L17                                                                     | 0.594 | 1.191 |
| 223620_at    | GPR34         | G protein-coupled receptor 34                                                             | 0.649 | 1.191 |
| 225036_at    | SHB ///       | Src homology 2 domain containing adaptor protein B ///                                    |       |       |
|              | C9orf105      | chromosome 9 open reading frame 105                                                       | 0.647 | 1.191 |

|              |                                             |                                                                                                                                                   |       |       |
|--------------|---------------------------------------------|---------------------------------------------------------------------------------------------------------------------------------------------------|-------|-------|
| 200093_s_at  | HINT1                                       | histidine triad nucleotide binding protein 1 /// histidine triad nucleotide binding protein 1                                                     | 0.618 | 1.191 |
| 206366_x_at  | XCL2                                        | chemokine (C motif) ligand 2                                                                                                                      | 0.655 | 1.191 |
| 1556253_s_at | ---                                         | CDNA FLJ37989 fis, clone CTONG2011676                                                                                                             | 0.665 | 1.191 |
| 222848_at    | CENPK                                       | centromere protein K                                                                                                                              | 0.361 | 1.191 |
| 226223_at    | PAWR                                        | PRKC, apoptosis, WT1, regulator                                                                                                                   | 0.548 | 2.863 |
| 1556054_at   | TBC1D8                                      | TBC1 domain family, member 8 (with GRAM domain)                                                                                                   | 0.602 | 2.863 |
| 219278_at    | MAP3K6                                      | mitogen-activated protein kinase kinase kinase 6                                                                                                  | 0.659 | 2.863 |
| 223194_s_at  | C6orf85                                     | chromosome 6 open reading frame 85                                                                                                                | 0.614 | 2.863 |
| 212270_x_at  | RPL17                                       | ribosomal protein L17                                                                                                                             | 0.606 | 2.863 |
|              |                                             | ribosomal protein S7 /// ribosomal protein S7 /// similar to 40S ribosomal protein S7 (S8) /// similar to 40S                                     |       |       |
| 200082_s_at  | RPS7 ///<br>LOC644315 ///<br>LOC731257      | ribosomal protein S7 (S8) /// similar to 40S ribosomal protein S7 (S8) /// similar to 40S ribosomal protein S7 (S8)                               | 0.603 | 2.863 |
| 200032_s_at  | RPL9                                        | ribosomal protein L9 /// ribosomal protein L9                                                                                                     | 0.657 | 2.863 |
| 212281_s_at  | TMEM97                                      | transmembrane protein 97                                                                                                                          | 0.663 | 2.863 |
| 241762_at    | FBXO32                                      | F-box protein 32                                                                                                                                  | 0.657 | 2.863 |
| 242770_at    | ---                                         | CDNA FLJ44826 fis, clone BRACE3046762                                                                                                             | 0.645 | 2.863 |
| 225525_at    | CTA-221G9.4                                 | KIAA1671 protein                                                                                                                                  | 0.577 | 2.863 |
| 219629_at    | FAM118A                                     | family with sequence similarity 118, member A                                                                                                     | 0.574 | 2.863 |
| 212578_x_at  | RPS17                                       | ribosomal protein S17                                                                                                                             | 0.655 | 2.863 |
| 1557557_at   | MATN1                                       | Matrilin 1, cartilage matrix protein                                                                                                              | 0.664 | 2.863 |
| 202581_at    | HSPA1B                                      | heat shock 70kDa protein 1B                                                                                                                       | 0.628 | 2.863 |
| 228381_at    | ATF7IP2                                     | Activating transcription factor 7 interacting protein 2                                                                                           | 0.654 | 2.863 |
| 209686_at    | S100B                                       | S100 calcium binding protein B                                                                                                                    | 0.252 | 2.863 |
| 239292_at    | ---                                         | Transcribed locus                                                                                                                                 | 0.605 | 2.863 |
| 230557_at    | XRRA1                                       | X-ray radiation resistance associated 1                                                                                                           | 0.512 | 2.863 |
| 1558987_at   | FLJ40473                                    | hypothetical protein FLJ40473                                                                                                                     | 0.654 | 2.863 |
| 209031_at    | IGSF4                                       | Immunoglobulin superfamily, member 4                                                                                                              | 0.614 | 2.908 |
| 201665_x_at  | RPS17                                       | ribosomal protein S17                                                                                                                             | 0.666 | 2.908 |
| 235648_at    | ZNF567                                      | zinc finger protein 567                                                                                                                           | 0.653 | 2.908 |
|              |                                             | RPL34 /// ribosomal protein L34 /// ribosomal protein L34 ///                                                                                     |       |       |
|              |                                             | LOC342994 /// similar to ribosomal protein L34 /// similar to ribosomal                                                                           |       |       |
| 200026_at    | LOC651249 ///<br>LOC729536 ///<br>LOC731916 | protein L34 /// similar to ribosomal protein L34 /// similar to ribosomal protein L34 /// hypothetical protein LOC729536 /// hypothetical protein | 0.548 | 2.908 |
| 232600_at    | ANKRD42                                     | Ankyrin repeat domain 42                                                                                                                          | 0.641 | 2.908 |
| 213941_x_at  | RPS7                                        | ribosomal protein S7                                                                                                                              | 0.639 | 2.908 |
| 1555485_s_at | LOC202134                                   | hypothetical protein LOC202134                                                                                                                    | 0.466 | 2.908 |
| 206974_at    | CXCR6                                       | chemokine (C-X-C motif) receptor 6                                                                                                                | 0.644 | 2.908 |
| 211211_x_at  | SH2D1A                                      | SH2 domain protein 1A, Duncan's disease (lymphoproliferative syndrome)                                                                            | 0.663 | 2.908 |
|              |                                             | RPL36A /// ribosomal protein L36a /// similar to large subunit                                                                                    |       |       |
| 201406_at    | LOC729362                                   | ribosomal protein L36a                                                                                                                            | 0.576 | 2.908 |
| 232397_at    | HECW2                                       | HECT, C2 and WW domain containing E3 ubiquitin protein ligase 2                                                                                   | 0.662 | 2.908 |
| 200963_x_at  | RPL31                                       | ribosomal protein L31                                                                                                                             | 0.591 | 2.908 |

## Supplementary table 2

## Downregulated transcripts

|              |                                                          |                                                                                                                                                        |       |       |
|--------------|----------------------------------------------------------|--------------------------------------------------------------------------------------------------------------------------------------------------------|-------|-------|
| 200888_s_at  | RPL23                                                    | ribosomal protein L23                                                                                                                                  | 0.626 | 2.908 |
| 208195_at    | TTN                                                      | titin                                                                                                                                                  | 0.622 | 2.908 |
| 236511_at    | DUSP16                                                   | Dual specificity phosphatase 16                                                                                                                        | 0.629 | 2.908 |
| 221593_s_at  | RPL31                                                    | ribosomal protein L31                                                                                                                                  | 0.641 | 2.908 |
| 229130_at    | LOC285535                                                | hypothetical protein LOC285535                                                                                                                         | 0.653 | 2.908 |
| 217915_s_at  | C15orf15                                                 | chromosome 15 open reading frame 15                                                                                                                    | 0.550 | 2.908 |
| 200099_s_at  | RPS3A ///<br>LOC439992                                   | ribosomal protein S3A /// ribosomal protein S3A ///<br>similar to ribosomal protein S3a /// similar to ribosomal<br>protein S3a                        | 0.661 | 2.908 |
| 224786_at    | SCOC                                                     | short coiled-coil protein                                                                                                                              | 0.606 | 2.908 |
| 236107_at    | UBE2Z                                                    | ubiquitin-conjugating enzyme E2Z (putative)                                                                                                            | 0.647 | 3.003 |
| 242432_at    | LRRC37A2                                                 | Leucine rich repeat containing 37, member A2                                                                                                           | 0.664 | 3.003 |
| 222229_x_at  | LOC392501                                                | similar to 60S ribosomal protein L26                                                                                                                   | 0.662 | 3.003 |
| 1553513_at   | VNN3                                                     | vanin 3                                                                                                                                                | 0.646 | 3.003 |
| 219588_s_at  | NCAPG2                                                   | non-SMC condensin II complex, subunit G2                                                                                                               | 0.135 | 3.003 |
| 217753_s_at  | RPS26 ///<br>LOC644166 ///<br>LOC644191 ///<br>LOC728937 | ribosomal protein S26 /// similar to 40S ribosomal<br>protein S26 /// similar to 40S ribosomal protein S26 ///<br>similar to 40S ribosomal protein S26 | 0.635 | 3.003 |
| 1565834_a_at | ---                                                      | ---                                                                                                                                                    | 0.515 | 3.003 |
| 213472_at    | HNRPH1                                                   | heterogeneous nuclear ribonucleoprotein H1 (H)                                                                                                         | 0.631 | 3.003 |
| 1552656_s_at | UHMK1                                                    | U2AF homology motif (UHM) kinase 1                                                                                                                     | 0.620 | 3.003 |
| 230110_at    | MCOLN2                                                   | mucolipin 2                                                                                                                                            | 0.664 | 3.081 |
| 228818_at    | TPD52                                                    | Tumor protein D52                                                                                                                                      | 0.641 | 3.081 |
| 218865_at    | MOSC1                                                    | MOCO sulphurase C-terminal domain containing 1                                                                                                         | 0.654 | 3.081 |
| 205229_s_at  | COCH                                                     | coagulation factor C homolog, cochlin (Limulus<br>polyphemus)                                                                                          | 0.611 | 3.081 |
| 244779_at    | ---                                                      | CDNA FLJ34038 fis, clone FCBBF2005645                                                                                                                  | 0.646 | 3.081 |
| 244394_at    | BLK                                                      | B lymphoid tyrosine kinase                                                                                                                             | 0.649 | 3.081 |
| 225541_at    | RPL22L1                                                  | ribosomal protein L22-like 1                                                                                                                           | 0.643 | 3.081 |
| 207314_x_at  | KIR3DL2                                                  | killer cell immunoglobulin-like receptor, three domains,<br>long cytoplasmic tail, 2                                                                   | 0.638 | 3.081 |
| 232165_at    | EPPK1                                                    | epiplakin 1                                                                                                                                            | 0.665 | 3.081 |
| 240351_at    | LOC643749                                                | Hypothetical LOC643749                                                                                                                                 | 0.467 | 3.081 |
| 244521_at    | ---                                                      | Transcribed locus                                                                                                                                      | 0.433 | 3.081 |
| 209569_x_at  | D4S234E                                                  | DNA segment on chromosome 4 (unique) 234<br>expressed sequence                                                                                         | 0.576 | 3.081 |
| 200061_s_at  | RPS24                                                    | ribosomal protein S24 /// ribosomal protein S24                                                                                                        | 0.665 | 3.081 |
| 220328_at    | PHC3                                                     | polyhomeotic homolog 3 (Drosophila)                                                                                                                    | 0.613 | 3.223 |
| 202554_s_at  | GSTM3                                                    | glutathione S-transferase M3 (brain)                                                                                                                   | 0.466 | 3.223 |
| 222465_at    | C15orf15 ///<br>LOC284288                                | chromosome 15 open reading frame 15 /// similar to<br>ribosomal protein L24-like                                                                       | 0.593 | 3.223 |
| 201134_x_at  | COX7C                                                    | cytochrome c oxidase subunit VIIc                                                                                                                      | 0.639 | 3.223 |
| 238577_s_at  | ---                                                      | Transcribed locus                                                                                                                                      | 0.569 | 3.223 |
| 213013_at    | MAPK8IP1                                                 | mitogen-activated protein kinase 8 interacting protein 1                                                                                               | 0.649 | 3.223 |
| 230913_at    | ---                                                      | Full length insert cDNA clone ZE12B03                                                                                                                  | 0.631 | 3.223 |
| 228316_at    | FLJ31438                                                 | hypothetical protein FLJ31438                                                                                                                          | 0.497 | 3.223 |
| 1558185_at   | CLLU1                                                    | chronic lymphocytic leukemia up-regulated 1                                                                                                            | 0.642 | 3.223 |

|              |                    |                                                                                                                      |       |       |
|--------------|--------------------|----------------------------------------------------------------------------------------------------------------------|-------|-------|
| 226665_at    | AHSA2              | AHA1, activator of heat shock 90kDa protein ATPase homolog 2 (yeast)                                                 | 0.651 | 3.223 |
| 213846_at    | COX7C              | cytochrome c oxidase subunit VIIc                                                                                    | 0.613 | 3.223 |
| 1555194_at   | C18orf17           | Chromosome 18 open reading frame 17                                                                                  | 0.600 | 3.223 |
| 234398_at    | ---                | T-cell receptor alpha, clone PPN82                                                                                   | 0.661 | 3.433 |
| 224140_at    | NPCDR1             | nasopharyngeal carcinoma, down-regulated 1                                                                           | 0.654 | 3.433 |
| 225312_at    | COMMD6             | COMM domain containing 6                                                                                             | 0.650 | 3.433 |
| 202635_s_at  | POLR2K             | polymerase (RNA) II (DNA directed) polypeptide K, 7.0kDa                                                             | 0.581 | 3.433 |
| 215891_s_at  | GM2A               | GM2 ganglioside activator                                                                                            | 0.558 | 3.433 |
| 207229_at    | KLRA1              | killer cell lectin-like receptor subfamily A, member 1                                                               | 0.574 | 3.433 |
| 1552546_a_at | LETM2              | leucine zipper-EF-hand containing transmembrane protein 2                                                            | 0.593 | 3.433 |
| 1565833_at   | ---                | ---                                                                                                                  | 0.508 | 3.433 |
| 235400_at    | FCRLA              | Fc receptor-like A                                                                                                   | 0.665 | 3.631 |
| 1554273_a_at | LRAP               | leukocyte-derived arginine aminopeptidase                                                                            | 0.664 | 3.631 |
| 206785_s_at  | KLRC1 ///<br>KLRC2 | killer cell lectin-like receptor subfamily C, member 1 ///<br>killer cell lectin-like receptor subfamily C, member 2 | 0.642 | 3.631 |
| 231941_s_at  | MUC20              | mucin 20, cell surface associated                                                                                    | 0.653 | 3.631 |
| 206088_at    | LRRC37A2           | leucine rich repeat containing 37, member A2                                                                         | 0.654 | 3.913 |
| 231996_at    | N4BP2              | Nedd4 binding protein 2                                                                                              | 0.617 | 3.913 |
| 220112_at    | ANKRD55            | ankyrin repeat domain 55                                                                                             | 0.585 | 3.913 |
| 229189_s_at  | ---                | CDNA FLJ90295 fis, clone NT2RP2000240                                                                                | 0.652 | 3.913 |
| 221805_at    | NEFL               | neurofilament, light polypeptide 68kDa                                                                               | 0.519 | 3.913 |
| 211608_at    | ---                | Rearranged TCR Vbeta 12.3 mRNA for T cell receptor<br>/// Rearranged TCR Vbeta 12.3 mRNA for T cell receptor         | 0.488 | 3.913 |
| 239287_at    | ---                | Transcribed locus                                                                                                    | 0.621 | 4.263 |
| 205361_s_at  | PFDN4              | prefoldin subunit 4                                                                                                  | 0.654 | 4.263 |
| 234042_at    | TAS2R45            | taste receptor, type 2, member 45                                                                                    | 0.568 | 4.263 |
| 227340_s_at  | RGMB               | RGM domain family, member B                                                                                          | 0.627 | 4.263 |
| 233261_at    | EBF1               | Early B-cell factor 1                                                                                                | 0.622 | 4.263 |
| 208719_s_at  | DDX17              | DEAD (Asp-Glu-Ala-Asp) box polypeptide 17                                                                            | 0.651 | 4.263 |
| 206371_at    | FOLR3              | folate receptor 3 (gamma)                                                                                            | 0.580 | 4.663 |
| 206279_at    | PRKY               | protein kinase, Y-linked                                                                                             | 0.507 | 4.663 |
| 232618_at    | CYorf15A           | chromosome Y open reading frame 15A                                                                                  | 0.323 | 4.663 |
| 211469_s_at  | CXCR6              | chemokine (C-X-C motif) receptor 6                                                                                   | 0.648 | 4.663 |
| 229748_x_at  | LOC389833          | similar to hypothetical protein MGC27019                                                                             | 0.645 | 4.950 |
